# Supplementary material for: FusionFinder: A Software Tool to Identify Expressed Gene Fusion Candidates from RNA-Seq Data
Source: PLoS One. 2012 Jun 27;7(6):e39987. doi: 10.1371/journal.pone.0039987 (PMC3384600; doi:10.1371/journal.pone.0039987)
Supplement: Table S1 — The raw FusionMap (a) and Tophat-Fusion (b) output following an analysis of the Levin dataset. (XLS) [file pone.0039987.s001.xls]

## Sheet: a) FusionMap Raw Results
FusionID	BI.081030_SL-XBF_0001_FC30CB2AAXX.7.fq.UniqueCuttingPositionCount	BI.081030_SL-XBF_0001_FC30CB2AAXX.7.fq.SeedCount	BI.081030_SL-XBF_0001_FC30CB2AAXX.7.fq.RescuedCount	Strand	Chromosome1	Position1	Chromosome2	Position2	KnownGene1	KnownTranscript1	KnownExonNumber1	KnownTranscriptStrand1	KnownGene2	KnownTranscript2	KnownExonNumber2	KnownTranscriptStrand2	FusionJunctionSequence	SplicePattern
FUS_17007663_144877212(--)	8	9	7	--	1	17007664	1	144877213	RP1-163M9.6	ENST00000429207	5	-	PDE4DIP	ENST00000313382,ENST00000369356,ENST00000369354,ENST00000369353,ENST00000369359	31,28,28,24,31	-----	CCCGGGAACTGTCTTACCTACGGCAAAAAAatacgagaagggagaggtatttgttatctt	TA-AA
FUS_17008515_144879157(--)	4	1	3	--	1	17008516	1	144879158	RP1-163M9.6	ENST00000429207	4	-	PDE4DIP	ENST00000313382,ENST00000369356,ENST00000369354,ENST00000369353,ENST00000369359	30,27,27,23,30	-----	CTGAAGGCCCAGCTGCAGAATGCCAACAAGggcttcaggccaaaaaggacctggagagtc	GT-AG
FUS_17013825_144880857(--)	32	2	62	--	1	17013826	1	144880858	RP1-163M9.6	ENST00000429207	2	-	PDE4DIP	ENST00000313382,ENST00000369356,ENST00000369354,ENST00000369353,ENST00000369359	29,26,26,22,29	-----	ACGAGCTGGAGAAATACAGAGTTATACTTAgtgaatccttggtgaagcaggacagcaagc	GT-AG
FUS_17183429_144879157(+-)	4	1	3	+-	1	17183430	1	144879158	RP11-108M9.2	ENST00000414128	2	+	PDE4DIP	ENST00000313382,ENST00000369356,ENST00000369354,ENST00000369353,ENST00000369359	30,27,27,23,30	-----	CTGAAGGCCCAGCTGCAGAATGCCAACAAGggcttcaggccaaaaaggacctggagagtc	GT-AG
FUS_38226631_1068539928(--)	5	3	5	--	1	38226632	16	89845209	EPHA10	ENST00000319637	3	-	FANCA	ENST00000305699,ENST00000389301	19,20	--	GCCTCAGCCTCCTGAGTAGCTGGGATTATAgagcagataaaatccccccatctctgtact	GG-GA
FUS_51910716_2507957122(+-)	4	3	3	+-	1	51910717	7	73639491	EPS15	ENST00000396118,ENST00000371730,ENST00000396122,ENST00000371733	11,11,11,11	----	LAT2	ENST00000398475	13	+	TTCCCACAGTCCTTTGTGTCGCATAATGACctcggcctcccaaagtgccgggattacagg	CT-GC
FUS_51910716_2534251813(+-)	4	3	3	+-	1	51910717	7	99934182	EPS15	ENST00000396118,ENST00000371730,ENST00000396122,ENST00000371733	11,11,11,11	----	PILRB	ENST00000488972	1	+	TTCCCACAGTCCTTTGTGTCGCATAATGACctcggcctcccaaagtgccgggattacagg	CT-GC
FUS_144852393_145373506(--)	6	6	2	--	1	144852394	1	145373507	PDE4DIP	ENST00000469668,ENST00000460027,ENST00000369356,ENST00000313382,ENST00000369354,ENST00000369353,ENST00000369359,ENST00000464924	1,2,44,46,44,40,47,2	--------	RP11-458D21.2	ENST00000421937	2	-	CCACCAGAAGTCCTTAAAACAGCAGGAAAGgatttcctttttatcactggttttgatgga	GT-AG
FUS_144942689_149590971(--)	15	3	19	--	1	144942690	1	149590972	PDE4DIP	ENST00000496572,ENST00000477941	4,4	--	RP11-353N4.1	ENST00000428508	2	-	TACACTGAGGCCCTGGCCCAGAGGGACAATatctaaaaaaaataatgctgggaagtccta	TA-GG
FUS_144946740_149590970(--)	55	203	1179	--	1	144946741	1	149590971	PDE4DIP	ENST00000313382,ENST00000369356,ENST00000369354,ENST00000369359,ENST00000369351,ENST00000369349,ENST00000496572,ENST00000497529	8,5,5,8,5,5,3,6	--------	RP11-353N4.1	ENST00000428508	2	-	ACACTGAGGCCCTGGCCCAGAGGGACAAGAtctaaaaaaaataatgctgggaagtcctaa	GA-GA
FUS_144952200_149590972(--)	60	651	1181	--	1	144952201	1	149590973	PDE4DIP	ENST00000369347,ENST00000369348,ENST00000313382,ENST00000369356,ENST00000369354,ENST00000369359,ENST00000369351,ENST00000369349,ENST00000477941,ENST00000464103	4,7,7,4,4,7,4,4,3,5	----------	RP11-353N4.1	ENST00000428508	2	-	ATACACTGAGGCCCTGGCCCAGAGGGACAAgatctaaaaaaaataatgctgggaagtcct	GT-AG
FUS_144952200_149591758(--)	5	3	4	--	1	144952201	1	149591759	PDE4DIP	ENST00000369347,ENST00000369348,ENST00000313382,ENST00000369356,ENST00000369354,ENST00000369359,ENST00000369351,ENST00000369349,ENST00000477941,ENST00000464103	4,7,7,4,4,7,4,4,3,5	----------	RP11-353N4.1,RP11-277L2.2	ENST00000428508,ENST00000419105	1,2	-+	ATACACTGAGGCCCTGGCCCAGAGGGACAAatctaggtttctccactcaggaaaagagga	GT-AG
FUS_144952201_149591586(--)	8	19	7	--	1	144952202	1	149591587	PDE4DIP	ENST00000369347,ENST00000369348,ENST00000313382,ENST00000369356,ENST00000369354,ENST00000369359,ENST00000369351,ENST00000369349,ENST00000477941,ENST00000464103	4,7,7,4,4,7,4,4,3,5	----------	RP11-353N4.1	ENST00000428508	1	-	AATACACTGAGGCCCTGGCCCAGAGGGACAtgatctaaaaaaaataatgctgggaagtcc	AG-CC
FUS_144955215_149590972(--)	5	1	6	--	1	144955216	1	149590973	PDE4DIP	ENST00000313382,ENST00000369356,ENST00000369354,ENST00000369359,ENST00000369351,ENST00000369349,ENST00000477941,ENST00000369347,ENST00000369348,ENST00000464103	5,2,2,5,2,2,1,2,5,3	----------	RP11-353N4.1	ENST00000428508	2	-	GGACAAGAAACAGCATCTGGATAAAACATGgatctaaaaaaaataatgctgggaagtcct	GT-AG
FUS_154143186_1282267615(+-)	5	1	5	+-	1	154143187	19	53945568	TPM3	ENST00000509601,ENST00000368530,ENST00000323144,ENST00000368531,ENST00000302206,ENST00000513769,ENST00000312970,ENST00000271850,ENST00000509409,ENST00000328159,ENST00000341372,ENST00000330188,ENST00000341485,ENST00000368545,ENST00000368533,ENST00000469717	4,7,6,6,6,2,6,7,5,6,6,6,6,2,6,3	----------------	CTD-2224J9.2	ENST00000492121,ENST00000424846	1,2	++	TTCCTCATATTTATCTTCTTTTTGAGAGTAgactctgccagctcagctcgttcctctgtg	CT-GG
FUS_388509529_1878618326(+-)	6	1	15	+-	11	3724122	3	185507799	NUP98	ENST00000429801,ENST00000324932,ENST00000355260,ENST00000359171,ENST00000397013	3,23,23,23,23	-----	AC108670.1	ENST00000502700	3	+	TTGTAAATTTTGATTGTAGTAACCCACCAActgtaatctcagcactttgggaagctgagg	CT-AC
FUS_388509529_1966240363(+-)	10	5	19	+-	11	3724122	4	75107372	NUP98	ENST00000429801,ENST00000324932,ENST00000355260,ENST00000359171,ENST00000397013	3,23,23,23,23	-----	MTHFD2L	ENST00000429519,ENST00000433372	10,8	++	TTGTAAATTTTGATTGTAGTAACCCACCAActgtaatctcagcactttgggaagctgagg	CT-GC
FUS_388509529_2292076296(++)	8	2	19	++	11	3724122	6	28873737	NUP98	ENST00000429801,ENST00000324932,ENST00000355260,ENST00000359171,ENST00000397013	3,23,23,23,23	-----	TRIM27	ENST00000481474	6	-	TTGTAAATTTTGATTGTAGTAACCCACCAActgtaatctcagcactttgggaagctgagg	CT-GC
FUS_388509529_2298756843(++)	6	1	15	++	11	3724122	6	35554284	NUP98	ENST00000429801,ENST00000324932,ENST00000355260,ENST00000359171,ENST00000397013	3,23,23,23,23	-----	FKBP5	ENST00000373875	7	-	TTGTAAATTTTGATTGTAGTAACCCACCAActgtaatctcagcactttgggaagctgagg	CT-GC
FUS_388509529_2574113049(++)	8	3	17	++	11	3724122	7	139795418	NUP98	ENST00000429801,ENST00000324932,ENST00000355260,ENST00000359171,ENST00000397013	3,23,23,23,23	-----	JHDM1D	ENST00000472616	10	-	TTGTAAATTTTGATTGTAGTAACCCACCAActgtaatctcagcactttgggaagcagagg	CT-AC
FUS_432044795_824348157(--)	4	4	2	--	11	47259388	14	55534398	DDB2	ENST00000378600,ENST00000378601,ENST00000378603,ENST00000256996	4,7,7,8	++++	MAPK1IP1L	ENST00000395468	4	+	AATGAGGTTGTAGCGAGGATGCCAGGCTGCctgtaatctcagcactttgggaggctgagg	CT-GC
FUS_432044796_1490075856(-+)	5	1	6	-+	11	47259389	2	202624785	DDB2	ENST00000378600,ENST00000378601,ENST00000378603,ENST00000256996	4,7,7,8	++++	ALS2	ENST00000467448	4	-	CAATGAGGTTGTAGCGAGGATGCCAGGCTGcctgtaatctcaacactttgggaggctgag	CC-TG
FUS_432044796_2374793240(--)	5	1	6	--	11	47259389	6	111590681	DDB2	ENST00000378600,ENST00000378601,ENST00000378603,ENST00000256996	4,7,7,8	++++	KIAA1919	ENST00000368847	4	+	CAATGAGGTTGTAGCGAGGATGCCAGGCTGcctgtaatctcaacactttgggaggctgag	CC-TG
FUS_432044796_2532173620(-+)	5	1	6	-+	11	47259389	7	97855989	DDB2	ENST00000378600,ENST00000378601,ENST00000378603,ENST00000256996	4,7,7,8	++++	TECPR1	ENST00000479911	4	-	CAATGAGGTTGTAGCGAGGATGCCAGGCTGcctgtaatctcaacactttgggaggctgag	CC-TG
FUS_573637822_2871276304(--)	5	7	5	--	12	53845887	9	131455953	PCBP2	ENST00000437231,ENST00000455667,ENST00000447282,ENST00000359282,ENST00000439930,ENST00000359462	1,1,1,1,1,1	++++++	SET	ENST00000372692,ENST00000409104,ENST00000372688,ENST00000322030,ENST00000494141,ENST00000372686,ENST00000477806	6,6,7,6,5,6,6	+++++++	CTGCTCCGGCTGCTGCCTCTGCTGGTCTGGctttattctgcgtttgactcgaacgtttcg	GA-GG
FUS_576900406_576919866(++)	9	5	15	++	12	57108471	12	57127931	NACA	ENST00000450688,ENST00000435567,ENST00000393891,ENST00000454682,ENST00000356769	3,3,3,4,3	-----	PRIM1	ENST00000338193	12	-	ATTCATCACTGTCAGATTCTGTTCCAGACCcactcttcttaagaagttctccttttcggg	CT-AC
FUS_789598148_2585018053(-+)	5	2	4	-+	14	20784389	7	150700422	CCNB1IP1	ENST00000398160,ENST00000437553,ENST00000358932,ENST00000353689,ENST00000398169,ENST00000398163	5,1,5,4,5,5	------	NOS3	ENST00000484524,ENST00000467517	14,14	++	AGCTCCCGAGCGCTGGCCTTCTGGACATATcaggctggtctctaactcctgggttcaagc	CA-CC
FUS_861351118_1029870403(--)	4	1	3	--	14	92537359	16	51175684	ATXN3	ENST00000429774,ENST00000359819,ENST00000393289,ENST00000359366,ENST00000393287,ENST00000502250,ENST00000503767,ENST00000340660,ENST00000447800	7,11,11,9,10,7,9,9,11	---------	SALL1	ENST00000457559,ENST00000251020,ENST00000440970	3,2,2	---	AAAGCAGCAACAGCAGCAGCAGCAGCAGCAgcagcagcagcagcagcagcagcagcagcg	GC-AA
FUS_871363215_2081528581(-+)	4	2	9	-+	14	102549456	4	190395590	HSP90AA1	ENST00000216281,ENST00000334701,ENST00000441629	9,10,5	---	RP11-45F23.1	ENST00000506915	1	+	AGGCCTGGAACTTCCAGAGGATGAAGAAGAaccagaaacatatctattatatcacaggtg	GA-AA
FUS_871363974_2081528374(-+)	6	2	9	-+	14	102550215	4	190395383	HSP90AA1	ENST00000216281,ENST00000334701,ENST00000441629	7,8,3	---	RP11-45F23.1	ENST00000506915	1	+	TTTGAAAGTTATCAGGAAGAATTTGGTCAAaaaaatgcttagaactctttactgaactgg	AA-CA
FUS_918029340_1232819101(++)	5	2	7	++	15	41866013	19	4497054	TYRO3	ENST00000263798	18	+	AC011498.2	ENST00000398364	11	+	GAAACAGCCTCCGGAGTGTATGGAGGACGTtagacacggggtttcatcatgttggccagg	GT-AG
FUS_1068539928_1817912969(++)	5	3	5	++	16	89845209	3	124802442	FANCA	ENST00000305699,ENST00000389301	19,20	--	SLC12A8	ENST00000430155,ENST00000332979,ENST00000423114,ENST00000393469,ENST00000473262,ENST00000465475,ENST00000469902	8,15,15,13,13,6,14	-------	AGTACAGAGATGGGGGGATTTTATCTGCTCtataatcccagctactcaggaggctgaggc	TC-CC
FUS_1068539928_2395418126(+-)	5	3	5	+-	16	89845209	6	132215567	FANCA	ENST00000305699,ENST00000389301	19,20	--	ENPP1	ENST00000360971,ENST00000358229	25,25	++	AGTACAGAGATGGGGGGATTTTATCTGCTCtataatcccagctactcaggaggctgaggc	TC-CC
FUS_1068539928_2948784639(-+)	5	4	4	-+	16	89845209	X	67734272	FANCA	ENST00000305699,ENST00000389301	19,20	--	YIPF6	ENST00000470730	3	+	CCGTGTGGCGTTTATAGAGTCTCTGAAGAGatggagtctcgctctgttgcccaggctgga	GT-AG
FUS_1098136067_1099342725(++)	10	12	4	++	17	29086532	17	30293190	AC127024.1	ENST00000499895,ENST00000502024	4,4	++	SUZ12	ENST00000322652,ENST00000494429	5,3	++	CAAAAGCTTGTCAGCTCATTTGCAGCTTACgtttactggtttcttccacaaaaatgataa	AT-AC
FUS_1098143139_1099352201(++)	6	3	15	++	17	29093604	17	30302666	AC127024.1	ENST00000499895,ENST00000502024	5,5	++	SUZ12	ENST00000322652,ENST00000494429	7,5	++	TGCTTGTGAAAGTTTGCCACAAAAAAAGAAagagtgactcgtccaggaagaagagagttt	AG-TT
FUS_1098145389_1099352203(++)	6	3	5	++	17	29095854	17	30302668	AC127024.1	ENST00000502024,ENST00000499895	6,6	++	SUZ12	ENST00000322652,ENST00000494429	7,5	++	GTGAAAGTTTGCCACAAAAAAAGAAAGGATagtgactcgtccaggaagaagagagtttaa	GT-AG
FUS_1098146518_1099364874(++)	6	4	8	++	17	29096983	17	30315339	AC127024.1	ENST00000502024,ENST00000499895	7,6	++	SUZ12	ENST00000322652	10	+	TGCACAAATGACAGTATTTGATAAAAACAGaggctgcctccattcgaaacattttctcag	GT-AG
FUS_1229540463_1357978729(-+)	6	1	8	-+	19	1218416	2	70527658	STK11	ENST00000326873,ENST00000405031	2,3	++	FAM136A	ENST00000498665	2	-	TGCCGTAACCTCCTCAGTAGTTGAATTTCCcatgttggccaggatggtcttgatctcctg	CT-AC
FUS_1229540463_1846214957(-+)	8	5	8	-+	19	1218416	3	153104430	STK11	ENST00000326873,ENST00000405031	2,3	++	RP11-292E2.3	ENST00000492569	1	-	TGCCGTAACCTCCTCAGTAGTTGAATTTCCcatgttggccaggatggtctggatctcctg	CT-AC
FUS_1547348720_2572506666(-+)	6	1	8	-+	20	16698225	7	138189035	RP4-705D16.3	ENST00000425939	3	-	TRIM24	ENST00000439939,ENST00000343526,ENST00000452999,ENST00000415680,ENST00000476785,ENST00000497516,ENST00000378381,ENST00000494040	3,2,2,2,2,2,2,1	++++++++	CCTCAGCCTCCCAAAATGTTGGGATTACAGttggagtcattcgttgcccagtttgcagcc	GT-AG
FUS_1659094924_2873894753(+-)	48	42	103	+-	22	17288973	9	134074402	XKR3	ENST00000331428	2	-	NUP214	ENST00000483497,ENST00000359428,ENST00000411637,ENST00000451030,ENST00000453861	29,29,29,29,19	+++++	TCTTCAAACACTGTCTCCATTCTCAGGGTGctgaagcttggcaaaagctgaacccagagg	CT-AC
FUS_1659108450_2873894750(+-)	35	8	103	+-	22	17302499	9	134074399	XKR3	ENST00000331428	1	-	NUP214	ENST00000483497,ENST00000359428,ENST00000411637,ENST00000451030,ENST00000453861	29,29,29,29,19	+++++	TCAAACACTGTCTCCATTCTCAGGGTGCTTaagcttggcaaaagctgaacccagaggttg	AT-TG
FUS_1659108450_2873894753(+-)	7	4	9	+-	22	17302499	9	134074402	XKR3	ENST00000331428	1	-	NUP214	ENST00000483497,ENST00000359428,ENST00000411637,ENST00000451030,ENST00000453861	29,29,29,29,19	+++++	TCAAACACTGTCTCCATTCTCAGGGTGCTTctgaagcttggcaaaagctgaacccagagg	AT-AC
FUS_1665438549_2873410189(++)	4	33	0	++	22	23632598	9	133589838	BCR	ENST00000305877,ENST00000398512,ENST00000359540,ENST00000290956,ENST00000292697,ENST00000334149,ENST00000436011,ENST00000487968	14,13,14,11,10,15,10,5	++++++++	ABL1	ENST00000426772,ENST00000393293,ENST00000372348,ENST00000438426	1,1,1,1	++++	CCACTCAGCCACTGGATTTAAGCAGAGTTCacaagcccttcagcggccagtagcatctga	AA-GA
FUS_1665438549_2873531262(++)	4	33	0	++	22	23632598	9	133710911	BCR	ENST00000305877,ENST00000398512,ENST00000359540,ENST00000290956,ENST00000292697,ENST00000334149,ENST00000436011,ENST00000487968	14,13,14,11,10,15,10,5	++++++++	ABL1	ENST00000444970,ENST00000318560	1,1	++	CCACTCAGCCACTGGATTTAAGCAGAGTTCagaagcccttcagcggccagtagcatctga	AA-GA
FUS_1665438551_2873549802(++)	64	298	666	++	22	23632600	9	133729451	BCR	ENST00000305877,ENST00000398512,ENST00000359540,ENST00000290956,ENST00000292697,ENST00000334149,ENST00000436011,ENST00000487968	14,13,14,11,10,15,10,5	++++++++	ABL1	ENST00000393293,ENST00000372348,ENST00000438426,ENST00000318560,ENST00000444970	2,2,2,2,2	+++++	ACTCAGCCACTGGATTTAAGCAGAGTTCAAaagcccttcagcggccagtagcatctgact	GT-AG
FUS_1665440680_2873549804(++)	59	14	666	++	22	23634729	9	133729453	BCR	ENST00000305877,ENST00000398512,ENST00000359540,ENST00000290956,ENST00000292697,ENST00000334149,ENST00000436011,ENST00000419722	15,14,15,12,11,16,11,2	++++++++	ABL1	ENST00000393293,ENST00000372348,ENST00000438426,ENST00000318560,ENST00000444970	2,2,2,2,2	+++++	TCAGCCACTGGATTTAAGCAGAGTTCAAATgcccttcagcggccagtagcatctgacttt	CT-AA
FUS_2307402724_2307418926(++)	16	7	30	++	6	44200165	6	44216367	SLC29A1	ENST00000371708,ENST00000371713,ENST00000371724,ENST00000393841,ENST00000371731,ENST00000371740,ENST00000371755,ENST00000313248,ENST00000427851,ENST00000393844	10,11,12,12,12,12,11,12,11,11	++++++++++	HSP90AB1	ENST00000353801,ENST00000371646,ENST00000441736,ENST00000371565,ENST00000371556,ENST00000371562,ENST00000371554	2,2,2,2,2,2,2	+++++++	GGCCGGAGCCTCACAGCTGTATTCATGTGGatgcctgaggaagtgcaccatggagaggag	GT-AG
FUS_2945858859_2945987047(++)	7	1	16	++	X	64808492	X	64936680	RP11-368D24__A.1	ENST00000439474,ENST00000429601,ENST00000447323	1,1,1	+++	MSN	ENST00000360270,ENST00000396084	2,2	++	CAGTGTTCGTGGACCATGCAAAACAACCAAatcagtgtgcgtgtgaccaccatggatgca	GT-AG

## Sheet: b) Tophat-fusion Raw Results
Fusion	Sample Name	Gene on left	Chr on left	Coord on left	Gene on right	Chr on right	Coord on right	Span reads	Span Mates	Span Mate Span
1	chr22-chr9	BCR	chr22	23632599	ABL1	chr9	133655755	31	0	0
1	chr22-chr9	BCR	chr22	23632599	ABL1	chr9	133729450	586	0	0
2	chr9-chr22	NUP214	chr9	134074401	XKR3	chr22	17288972	84	0	0
2	chr9-chr22	NUP214	chr9	134074401	XKR3	chr22	17288975	8	0	0
3	chr17-chr16	TAF15	chr17	34147025	ALDOA	chr16	30078559	9	0	0
4	chr1-chr1	TPR	chr1	186319519	ENSG00000229344	chr1	568235	4	0	0
5	chr19-chr4	EEF2	chr19	3976066	HSP90AB3P	chr4	88814627	4	0	0
6	chr17-chr1	SEPT9	chr17	75484327	ENSG00000237973	chr1	567043	4	0	0
7	chr20-chr12	TOP1	chr20	39726852	SCYL2	chr12	100732860	7	0	0
8	chr20-chr5	GNAS	chr20	57485427	SDHA	chr5	236657	4	0	0
9	chr11-chr2	CARS	chr11	3026608	SNRNP200	chr2	96952105	4	0	0
10	chr21-chr11	GART	chr21	34893260	NUP98	chr11	3752804	4	0	0
11	chr22-chr9	BCR	chr22	23630281	ABL1	chr9	133655893	4	0	0
12	chr22-chr1	CHEK2	chr22	29095919	ENSG00000237973	chr1	566934	5	0	0
