# Supplementary material for: FusionFinder: A Software Tool to Identify Expressed Gene Fusion Candidates from RNA-Seq Data
Source: PLoS One. 2012 Jun 27;7(6):e39987. doi: 10.1371/journal.pone.0039987 (PMC3384600; doi:10.1371/journal.pone.0039987)
Supplement: Table S2 — The sensitivity measurements for each of the 55 simulated fusion genes (a) and the raw FusionFinder (b), FusionMap (c) and Tophat-Fusion (d) output. (XLS) [file pone.0039987.s002.xls]

## Sheet: a) Simulated Fusion Genes
This table shows the 55 simulated fusion genes along with the number of fusion reads designed against them. It also shows whether FusionFinder (FF), FusionMap (FM) or Tophat-Fusion (THF) were able to detect these fusions and how many reads gave evidence for their existence. Finally the comments section gives details of any fusions that were not detected for any known reason and other information …
sym_G1	sym_G2	sym_reads	FF_detect	FF_reads	FM_detect	FM_reads	THF_detect	THF_reads	Comments
ENSG00000211691:TRGJP(ENSE00001693039)	ENSG00000153037:SRP19(ENSE00002307562)	295	1	219	1	295	1	295
ENSG00000172487:OR8J1(ENSE00001172518)	ENSG00000171310:CHST11(ENSE00001401214)	280	1	280	0	0	1	280
ENSG00000183549:ACSM5(ENSE00001297544)	ENSG00000222007:AC064874.1(ENSE00001582924)	260	1	260	0	0	1	280
ENSG00000155100:OTUD6B(ENSE00001019195)	ENSG00000101751:POLI(ENSE00000669401)	237	1	237	1	237	1	237
ENSG00000188511:C22orf34(ENSE00001541232)	ENSG00000160868:CYP3A4(ENSE00001786394)	234	0	0	1	234	0	0	FF and THF not found due to same class of repeat present in both genes at the simulated breakpoint
ENSG00000164830:AC090579.1(ENSE00002127511)	ENSG00000178935:ZNF552(ENSE00002208311)	219	1	63	0	0	1	219
ENSG00000188015:S100A3(ENSE00001447827)	ENSG00000213648:SULT1A4(ENSE00001720833)	211	1	70	0	0	1	211
ENSG00000158769:F11R(ENSE00001375812)	ENSG00000165704:HPRT1(ENSE00001095669)	182	1	182	1	182	1	182
ENSG00000117560:FASLG(ENSE00000789865)	ENSG00000222014:RAB6C(ENSE00001588213)	179	1	23	0	0	0	0
ENSG00000213020:ZNF611(ENSE00002220640)	ENSG00000147121:ZNF673(ENSE00001388167)	155	1	155	0	0	0	0
ENSG00000156345:CDK20(ENSE00001712932)	ENSG00000164951:PDP1(ENSE00002288091)	148	1	111	1	148	1	148
ENSG00000164330:EBF1(ENSE00002228909)	ENSG00000071243:ING3(ENSE00000881961)	144	1	120	1	144	1	144
ENSG00000168539:CHRM1(ENSE00002289812)	ENSG00000161960:EIF4A1(ENSE00001762686)	121	1	121	0	0	0	0
ENSG00000091136:LAMB1(ENSE00001608407)	ENSG00000108296:CWC25(ENSE00000717976)	112	1	112	0	0	1	112
ENSG00000101441:CST4(ENSE00001638329)	ENSG00000130764:LRRC47(ENSE00000896210)	112	1	28	0	0	0	0
ENSG00000256718:AL009172.1(ENSE00002239871)	ENSG00000188559:RALGAPA2(ENSE00001711909)	112	0	0	1	112	0	0	FF and THF not found due to same class of repeat present in both genes at the simulated breakpoint
ENSG00000130202:PVRL2(ENSE00000893924)	ENSG00000109861:CTSC(ENSE00002172917)	108	1	43	1	108	1	108
ENSG00000174175:SELP(ENSE00002219841)	ENSG00000156413:FUT6(ENSE00002168595)	108	0	0	0	0	0	0
ENSG00000135540:NHSL1(ENSE00001370074)	ENSG00000219545:AC006465.3(ENSE00002321542)	107	1	107	1	107	1	107
ENSG00000135828:RNASEL(ENSE00002263029)	ENSG00000169239:CA5B(ENSE00001924396)	103	1	103	0	0	1	103
ENSG00000150455:TIRAP(ENSE00000994997)	ENSG00000197444:OGDHL(ENSE00000883717)	99	1	75	1	99	1	99
ENSG00000158290:CUL4B(ENSE00001454953)	ENSG00000211966:IGHV5-51(ENSE00001896292)	87	1	87	0	0	1	87
ENSG00000122970:IFT81(ENSE00001195384)	ENSG00000254550:OMP(ENSE00002199725)	70	1	70	1	70	1	70
ENSG00000156885:COX6A2(ENSE00001028900)	ENSG00000142867:BCL10(ENSE00001453072)	70	1	70	0	0	1	70
ENSG00000121440:PDZRN3(ENSE00002227935)	ENSG00000206432:TMEM200C(ENSE00001497187)	69	1	69	1	69	1	69
ENSG00000092377:TBL1Y(ENSE00001729171)	ENSG00000203782:LOR(ENSE00001447885)	66	1	66	0	0	1	66
ENSG00000114656:KIAA1257(ENSE00002035187)	ENSG00000204010:IFIT1B(ENSE00001456138)	66	1	66	1	66	1	66
ENSG00000158528:PPP1R9A(ENSE00001593289)	ENSG00000251258:RFPL4B(ENSE00002289141)	59	1	59	1	59	1	59
ENSG00000108175:ZMIZ1(ENSE00002294999)	ENSG00000172331:BPGM(ENSE00001242893)	52	1	52	1	52	1	52
ENSG00000179029:TMEM107(ENSE00001236177)	ENSG00000089250:NOS1(ENSE00002289716)	32	0	0	0	0	0	0
ENSG00000055147:FAM114A2(ENSE00001372734)	ENSG00000255407:AC114947.1(ENSE00001380617)	9	1	7	0	0	0	0
ENSG00000173465:SSSCA1(ENSE00002157801)	ENSG00000090372:STRN4(ENSE00002232220)	9	1	9	1	9	0	0
ENSG00000102468:HTR2A(ENSE00001478423)	ENSG00000052126:PLEKHA5(ENSE00001318648)	8	1	8	1	8	1	8
ENSG00000115523:GNLY(ENSE00000767621)	ENSG00000186777:ZNF732(ENSE00001608370)	8	0	0	0	0	0	0
ENSG00000117425:PTCH2(ENSE00001045273)	ENSG00000213625:LEPROT(ENSE00000774050)	8	1	8	1	8	1	8
ENSG00000118690:ARMC2(ENSE00000800331)	ENSG00000150433:TMEM218(ENSE00002153919)	8	1	7	1	8	1	8
ENSG00000227140:USP17L5(ENSE00002053022)	ENSG00000115561:VPS24(ENSE00000799938)	8	1	1	0	0	0	0
ENSG00000130703:OSBPL2(ENSE00001211285)	ENSG00000213782:DDX47(ENSE00001288400)	7	1	5	1	7	0	0
ENSG00000103353:UBFD1(ENSE00000677044)	ENSG00000137807:KIF23(ENSE00000696301)	6	1	6	1	6	1	6
ENSG00000183035:CYLC1(ENSE00001391227)	ENSG00000182742:HOXB4(ENSE00001315607)	6	1	6	1	6	0	0
ENSG00000196843:ARID5A(ENSE00001773513)	ENSG00000085185:BCORL1(ENSE00001763862)	6	0	0	0	0	0	0
ENSG00000120500:ARR3(ENSE00000672306)	ENSG00000105298:C19orf29(ENSE00000876021)	5	1	2	1	5	1	5
ENSG00000239862:IGKV1-37(ENSE00001852981)	ENSG00000178096:BOLA1(ENSE00001826545)	5	1	4	0	0	0	0
ENSG00000244038:DDOST(ENSE00001281955)	ENSG00000132341:RAN(ENSE00002290307)	5	1	4	1	5	1	5
ENSG00000119487:MAPKAP1(ENSE00001776429)	ENSG00000213494:CCL14(ENSE00001601988)	4	1	4	1	4	1	4
ENSG00000143153:ATP1B1(ENSE00002294588)	ENSG00000081842:PCDHA6(ENSE00002275042)	4	0	0	1	4	0	0	FF found ATB1P1:PCDHA4,10,13. Neither of these genes are the same as PCDHA6 so this has been counted as false
ENSG00000169208:OR10G3(ENSE00001122725)	ENSG00000183856:IQGAP3(ENSE00001295781)	4	1	4	1	4	0	0
ENSG00000214194:AC073346.2(ENSE00001802513)	ENSG00000152439:ZNF773(ENSE00002251820)	4	1	2	1	4	1	4	FM found LOC401397:ZNF773. LOC401397 is the same gene as AC073346.2 so this was counted as true
ENSG00000151835:SACS(ENSE00001739205)	ENSG00000137491:SLCO2B1(ENSE00002197212)	3	1	3	0	0	0	0
ENSG00000164091:WDR82(ENSE00002223033)	ENSG00000111271:ACAD10(ENSE00002299071)	3	1	3	0	0	1	3
ENSG00000095464:PDE6C(ENSE00001702429)	ENSG00000204118:NAP1L6(ENSE00001460744)	2	1	2	0	0	0	0
ENSG00000188771:C11orf34(ENSE00002185023)	ENSG00000110442:COMMD9(ENSE00002155302)	2	1	1	1	2	1	2
ENSG00000107937:GTPBP4(ENSE00001094477)	ENSG00000176407:KCMF1(ENSE00002255775)	1	1	1	1	1	1	1
ENSG00000187098:MITF(ENSE00002204572)	ENSG00000151812:SLC35F4(ENSE00001317036)	1	1	1	1	1	1	1
ENSG00000255828:AL359091.1(ENSE00002227323)	ENSG00000154447:SH3RF1(ENSE00002216997)	1	1	1	1	1	1	1	All software found CERCAM:SH3RF1. CERCAM is the same gene as AL359091.1 so this has been counted as true in all cases
		4224	48	2937	32	2065	35	3120

## Sheet: b) FusionFinder Raw Results
G1_Ensembl_HGNC_ID	G1_chromosome	G2_Ensembl_HGNC_ID	G2_chromosome	totalreads	G1_blocks	G2_blocks	isoforms	category
ENSG00000172487 (OR8J1)	chromosome_11	ENSG00000171310 (CHST11)	chromosome_12	280	1	1	1	INTERCHROMOSOMAL
ENSG00000183549 (ACSM5)	chromosome_16	ENSG00000222007 (AC064874.1)	chromosome_2	260	1	1	1	INTERCHROMOSOMAL
ENSG00000155100 (OTUD6B)	chromosome_8	ENSG00000101751 (POLI)	chromosome_18	237	1	1	1	INTERCHROMOSOMAL
ENSG00000211691 (TRGJP)	chromosome_7	ENSG00000153037 (SRP19)	chromosome_5	219	1	1	1	INTERCHROMOSOMAL
ENSG00000158769 (F11R)	chromosome_1	ENSG00000165704 (HPRT1)	chromosome_X	182	1	1	1	INTERCHROMOSOMAL
ENSG00000164830 (AC090579.1)	chromosome_8	ENSG00000198466 (ZNF587)	chromosome_19	156	1	1	1	INTERCHROMOSOMAL
ENSG00000213020 (ZNF611)	chromosome_19	ENSG00000147121 (ZNF673)	chromosome_X	155	1	1	1	INTERCHROMOSOMAL
ENSG00000188015 (S100A3)	chromosome_1	ENSG00000213599 (SULT1A3)	chromosome_16	141	1	1	1	INTERCHROMOSOMAL
ENSG00000168539 (CHRM1)	chromosome_11	ENSG00000161960 (EIF4A1)	chromosome_17	121	1	1	1	INTERCHROMOSOMAL
ENSG00000164330 (EBF1)	chromosome_5	ENSG00000071243 (ING3)	chromosome_7	120	1	1	1	INTERCHROMOSOMAL
ENSG00000091136 (LAMB1)	chromosome_7	ENSG00000108296 (CWC25)	chromosome_17	112	1	1	1	INTERCHROMOSOMAL
ENSG00000156345 (CDK20)	chromosome_9	ENSG00000164951 (PDP1)	chromosome_8	111	1	1	1	INTERCHROMOSOMAL
ENSG00000135540 (NHSL1)	chromosome_6	ENSG00000219545 (AC006465.3)	chromosome_7	107	1	1	1	INTERCHROMOSOMAL
ENSG00000135828 (RNASEL)	chromosome_1	ENSG00000169239 (CA5B)	chromosome_X	103	1	1	1	INTERCHROMOSOMAL
ENSG00000158290 (CUL4B)	chromosome_X	ENSG00000211966 (IGHV5-51)	chromosome_14	87	1	1	1	INTERCHROMOSOMAL
ENSG00000150455 (TIRAP)	chromosome_11	ENSG00000197444 (OGDHL)	chromosome_10	75	1	1	1	INTERCHROMOSOMAL
ENSG00000122970 (IFT81)	chromosome_12	ENSG00000254550 (OMP)	chromosome_11	70	1	1	1	INTERCHROMOSOMAL
ENSG00000156885 (COX6A2)	chromosome_16	ENSG00000142867 (BCL10)	chromosome_1	70	1	1	1	INTERCHROMOSOMAL
ENSG00000188015 (S100A3)	chromosome_1	ENSG00000213648 (SULT1A4)	chromosome_16	70	1	1	1	INTERCHROMOSOMAL
ENSG00000121440 (PDZRN3)	chromosome_3	ENSG00000206432 (TMEM200C)	chromosome_18	69	1	1	1	INTERCHROMOSOMAL
ENSG00000092377 (TBL1Y)	chromosome_Y	ENSG00000203782 (LOR)	chromosome_1	66	1	1	1	INTERCHROMOSOMAL
ENSG00000114656 (KIAA1257)	chromosome_3	ENSG00000204010 (IFIT1B)	chromosome_10	66	1	1	1	INTERCHROMOSOMAL
ENSG00000164830 (AC090579.1)	chromosome_8	ENSG00000178935 (ZNF552)	chromosome_19	63	1	1	1	INTERCHROMOSOMAL
ENSG00000158528 (PPP1R9A)	chromosome_7	ENSG00000251258 (RFPL4B)	chromosome_6	59	1	1	1	INTERCHROMOSOMAL
ENSG00000170373 (CST1)	chromosome_20	ENSG00000130764 (LRRC47)	chromosome_1	56	1	1	1	INTERCHROMOSOMAL
ENSG00000108175 (ZMIZ1)	chromosome_10	ENSG00000172331 (BPGM)	chromosome_7	52	1	1	1	INTERCHROMOSOMAL
ENSG00000130202 (PVRL2)	chromosome_19	ENSG00000109861 (CTSC)	chromosome_11	43	1	1	1	INTERCHROMOSOMAL
ENSG00000211691 (TRGJP)	chromosome_7	ENSG00000134982 (APC)	chromosome_5	41	1	1	1	INTERCHROMOSOMAL
ENSG00000101441 (CST4)	chromosome_20	ENSG00000130764 (LRRC47)	chromosome_1	28	1	1	1	INTERCHROMOSOMAL
ENSG00000170369 (CST2)	chromosome_20	ENSG00000130764 (LRRC47)	chromosome_1	28	1	1	1	INTERCHROMOSOMAL
ENSG00000117560 (FASLG)	chromosome_1	ENSG00000222014 (RAB6C)	chromosome_2	23	1	1	1	INTERCHROMOSOMAL
ENSG00000173465 (SSSCA1)	chromosome_11	ENSG00000090372 (STRN4)	chromosome_19	9	1	1	1	INTERCHROMOSOMAL
ENSG00000102468 (HTR2A)	chromosome_13	ENSG00000052126 (PLEKHA5)	chromosome_12	8	1	1	1	INTERCHROMOSOMAL
ENSG00000117425 (PTCH2)	chromosome_1	ENSG00000213625 (LEPROT)	chromosome_1	8	1	1	1	INVERSION,INTRACHROMOSOMAL
ENSG00000055147 (FAM114A2)	chromosome_5	ENSG00000255407 (AC114947.1)	chromosome_5	7	1	1	1	INVERSION,INTRACHROMOSOMAL
ENSG00000118690 (ARMC2)	chromosome_6	ENSG00000150433 (TMEM218)	chromosome_11	7	1	1	1	INTERCHROMOSOMAL
ENSG00000103353 (UBFD1)	chromosome_16	ENSG00000137807 (KIF23)	chromosome_15	6	1	1	1	INTERCHROMOSOMAL
ENSG00000183035 (CYLC1)	chromosome_X	ENSG00000182742 (HOXB4)	chromosome_17	6	1	1	1	INTERCHROMOSOMAL
ENSG00000130703 (OSBPL2)	chromosome_20	ENSG00000213782 (DDX47)	chromosome_12	5	1	1	1	INTERCHROMOSOMAL
ENSG00000119487 (MAPKAP1)	chromosome_9	ENSG00000213494 (CCL14)	chromosome_17	4	1	1	1	INTERCHROMOSOMAL
ENSG00000169208 (OR10G3)	chromosome_14	ENSG00000183856 (IQGAP3)	chromosome_1	4	1	1	1	INTERCHROMOSOMAL
ENSG00000239862 (IGKV1-37)	chromosome_2	ENSG00000178096 (BOLA1)	chromosome_1	4	1	1	1	INTERCHROMOSOMAL
ENSG00000244038 (DDOST)	chromosome_1	ENSG00000132341 (RAN)	chromosome_12	4	1	1	1	INTERCHROMOSOMAL
ENSG00000151835 (SACS)	chromosome_13	ENSG00000137491 (SLCO2B1)	chromosome_11	3	1	1	1	INTERCHROMOSOMAL
ENSG00000164091 (WDR82)	chromosome_3	ENSG00000111271 (ACAD10)	chromosome_12	3	1	1	1	INTERCHROMOSOMAL
ENSG00000095464 (PDE6C)	chromosome_10	ENSG00000204118 (NAP1L6)	chromosome_X	2	1	1	1	INTERCHROMOSOMAL
ENSG00000120500 (ARR3)	chromosome_X	ENSG00000105298 (C19orf29)	chromosome_19	2	1	1	1	INTERCHROMOSOMAL
ENSG00000130703 (OSBPL2)	chromosome_20	ENSG00000255661 (RP11-59H1.3)	chromosome_12	2	1	1	1	INTERCHROMOSOMAL
ENSG00000143153 (ATP1B1)	chromosome_1	ENSG00000204967 (PCDHA4)	chromosome_5	2	1	1	1	INTERCHROMOSOMAL
ENSG00000214194 (AC073346.2)	chromosome_7	ENSG00000152439 (ZNF773)	chromosome_19	2	1	1	1	INTERCHROMOSOMAL
ENSG00000250844 (RP11-1286E23.13)	chromosome_4	ENSG00000249884 (RNF103-VPS24)	chromosome_2	2	1	1	1	INTERCHROMOSOMAL
ENSG00000107937 (GTPBP4)	chromosome_10	ENSG00000176407 (KCMF1)	chromosome_2	1	1	1	1	INTERCHROMOSOMAL
ENSG00000143153 (ATP1B1)	chromosome_1	ENSG00000239389 (PCDHA13)	chromosome_5	1	1	1	1	INTERCHROMOSOMAL
ENSG00000143153 (ATP1B1)	chromosome_1	ENSG00000250120 (PCDHA10)	chromosome_5	1	1	1	1	INTERCHROMOSOMAL
ENSG00000167123 (CERCAM)	chromosome_9	ENSG00000154447 (SH3RF1)	chromosome_4	1	1	1	1	INTERCHROMOSOMAL
ENSG00000187098 (MITF)	chromosome_3	ENSG00000151812 (SLC35F4)	chromosome_14	1	1	1	1	INTERCHROMOSOMAL
ENSG00000188771 (C11orf34)	chromosome_11	ENSG00000110442 (COMMD9)	chromosome_11	1	1	1	1	INTRACHROMOSOMAL
ENSG00000227140 (USP17L5)	chromosome_4	ENSG00000115561 (VPS24)	chromosome_2	1	1	1	1	INTERCHROMOSOMAL
ENSG00000227140 (USP17L5)	chromosome_4	ENSG00000249884 (RNF103-VPS24)	chromosome_2	1	1	1	1	INTERCHROMOSOMAL
ENSG00000232264 (AC116655.1)	chromosome_4	ENSG00000115561 (VPS24)	chromosome_2	1	1	1	1	INTERCHROMOSOMAL
ENSG00000232399 (RP11-1286E23.8)	chromosome_4	ENSG00000249884 (RNF103-VPS24)	chromosome_2	1	1	1	1	INTERCHROMOSOMAL
ENSG00000248933 (RP11-1286E23.17)	chromosome_4	ENSG00000249884 (RNF103-VPS24)	chromosome_2	1	1	1	1	INTERCHROMOSOMAL
ENSG00000249104 (RP11-1286E23.12)	chromosome_4	ENSG00000115561 (VPS24)	chromosome_2	1	1	1	1	INTERCHROMOSOMAL

## Sheet: c) FusionMap Raw Results
FusionID	randomreads.txt.UniqueCuttingPositionCount	randomreads.txt.SeedCount	randomreads.txt.RescuedCount	Strand	Chromosome1	Position1	Chromosome2	Position2	KnownGene1	KnownTranscript1	KnownExonNumber1	KnownTranscriptStrand1	KnownGene2	KnownTranscript2	KnownExonNumber2	KnownTranscriptStrand2	FusionJunctionSequence	SplicePattern	FusionGene	FrameShift
FUS_1770676_1009286990(++)	10	8	4	++	1	1770677	16	30592271	GNB1	NM_002074_chr1	2	-	ZNF785	NM_152458_chr16	3	-	TGGTCTGGTCTCCAATACATGTAAATTTGTctgaggtcaggaattggagaccagcctggc	CT-AC	ZNF785->GNB1	->
FUS_2303919_453308984(--)	6	2	4	--	1	2303920	11	68523577	MORN1	NM_024848_chr1	8	-	CPT1A	NM_001876_chr11	19	-	TGCTGCAGGACCACGGGGAAATTGCCAAGAatggagtttcactcttgttgcccaggctgg	GT-AG	MORN1->CPT1A	0->
FUS_2303919_983434506(-+)	17	2	18	-+	1	2303920	16	4739787	MORN1	NM_024848_chr1	8	-	MGRN1	NM_001142290_chr16,NM_001142291_chr16,NM_015246_chr16,NM_001142289_chr16	17,16,17,16	++++	TGCTGCAGGACCACGGGGAAATTGCCAAGAatggagtttcactcttgctgcccaggctgg	GT-AG	MORN1->MGRN1	0->
FUS_3697534_1943885795(+-)	8	4	7	+-	1	3697535	4	52752804	LRRC47	NM_020710_chr1	7	-	DCUN1D4	NM_015115_chr4,NM_001040402_chr4	6,6	++	CTCCAGCCTGGCGACAGAGCGAGACTCCATgttttctggttcaacaccaatgtcttcaca	CT-AC	DCUN1D4->LRRC47	2->
FUS_6582866_1247634505(-+)	7	6	5	-+	1	6582867	19	19312458	NOL9	NM_024654_chr1	12	-	NR2C2AP,RFXANK,RFXANK	NM_176880_chr19,NM_003721_chr19,NM_134440_chr19	5,10,9	-++	TCTCGGCTCACTGCAACTTCCGCCTCCCAGtgcaacaggtgatcgagaaccacatcctca	GT-AG	NR2C2AP,RFXANK,RFXANK->NOL9	1->
FUS_7980710_2375304332(++)	7	3	4	++	1	7980711	6	112101773	TNFRSF9	NM_001561_chr1	8	-	FYN	NM_002037_chr6	3	-	GCCTGGGTGACAGAGTGAGACCCTGTCAAAatgtccgccaacgatcacaaactttatata	AA-AA	FYN->TNFRSF9	->
FUS_9327062_2203935273(--)	3	1	2	--	1	9327063	5	121647978	H6PD	NM_004285_chr1	5	+	SNCAIP	NM_005460_chr5	1	+	AGCCTGGGCAACATGGTGAAACCCTGTCTCcggggcgcccggcgcgccggcggctcagga	TA-CC	SNCAIP->H6PD	->
FUS_10057387_381117283(-+)	5	1	4	-+	1	10057388	10	131866660	RBP7	NM_052960_chr1	1	+	LOC387723	NR_034125_chr10	6	-	GCTATTTTACGAGTGGCAAAGTCAATACCTgaggtcaggagtttgagaccagcctgatca	AG-TT	LOC387723->RBP7	->2
FUS_13944012_529639294(++)	4	1	4	++	1	13944013	12	9847359	PDPN	NM_001006624_chr1,NM_198389_chr1,NM_006474_chr1,NM_001006625_chr1	6,6,6,6	++++	CLEC2D	NR_036693_chr12,NM_001197317_chr12,NM_001197318_chr12,NM_013269_chr12,NM_001004419_chr12,NM_001197319_chr12	4,4,4,5,6,3	++++++	CAGCCTCCTGAGTAGCTGGGACTACAGGTTtcctatcctgggagcaggagagtgtgccta	CC-TT	PDPN->CLEC2D	->02
FUS_15896890_961642076(--)	3	1	2	--	1	15896891	15	85478749	DNAJC16	NM_015291_chr1	15	+	SLC28A1	NM_004213_chr15	15	+	CAGCCTGGGCAACATAGCAAGACCTCGTCTggagatccactgcttcctgtcgccgaccca	CT-AC	SLC28A1->DNAJC16	2->
FUS_16066954_323870908(--)	2	2	1	--	1	16066955	10	74620285	SLC25A34	NM_207348_chr1	5	+	CCDC109A	NM_138357_chr10	4	+	TCTGGCCAACATGGCAAAACCCCATCTCTActctttttggtggtcgtacgtggtatgtta	CT-AC	CCDC109A->SLC25A34	0->
FUS_16358951_16382184(++)	1	1	0	++	1	16358952	1	16382185	CLCNKA	NM_004070_chr1,NM_001042704_chr1	18,18	++	CLCNKB	NM_001165945_chr1,NM_000085_chr1	11,18	++	AGGGCTCCAGGACACCAGTGTCTCCAGGACatcttggctgcaggctgccccacagaacca	AT-AC	CLCNKA->CLCNKB	2->0
FUS_19586439_2593875196(--)	10	7	3	--	1	19586440	8	418877	MRTO4	NM_016183_chr1	8	+	FBXO25	NM_183421_chr8,NM_183420_chr8,NM_012173_chr8	11,10,9	+++	CCTGGGCAACATGGTGAAACCCCATCTCTCacagaacactcactatgagccctgcacaga	CT-TC	FBXO25->MRTO4	->
FUS_20238067_452583607(--)	10	2	10	--	1	20238068	11	67798200	OTUD3	NM_015207_chr1	8	+	NDUFS8	NM_002496_chr11	1	+	CAGCCTGGCTAACATGGTGAAACCCCGTCTcttgaagcgccgccgctacttgccttgcca	CT-AC	NDUFS8->OTUD3	->
FUS_20982593_651149064(-+)	1	5	0	-+	1	20982594	12	131357129	DDOST	NM_005216_chr1	3	-	RAN	NM_006325_chr12	2	+	GTGTGCTGGTAGCTGCCAGCTCCGACATTGgaacgccgcgatggctgcgcagggagagcc	GT-AG	DDOST->RAN	0->
FUS_22304861_1148335617(-+)	18	8	14	-+	1	22304862	17	79286082	CELA3B	NM_007352_chr1	2	+	TMEM105	NM_178520_chr17	3	-	GGCGAGAGGAAGGTGGGCCATAGCCTGAGGctgtaatcccagtgctttgagaggccgagg	CT-AC	TMEM105->CELA3B	->1
FUS_23519096_247263558(++)	2	3	1	++	1	23519097	1	247263559	HTR1D	NM_000864_chr1	1	-	ZNF669	NM_024804_chr1,NM_001142572_chr1	4,4	--	CTCATGCCTGTAATCCCAGCACTTTGGGATtacaggcgtaagccaccgtgcccggcatta	GC-AT	ZNF669->HTR1D	->
FUS_26227097_551654291(++)	5	6	2	++	1	26227098	12	31862356	STMN1	NM_203399_chr1,NM_005563_chr1,NM_203401_chr1	5,5,5	---	AMN1	NM_001113402_chr12,NR_004854_chr12	2,2	--	TGCAGTTTTATTAACCATTCAAGTCCAGTAgcatagatccaggagctgactgacccgccg	GC-AG	AMN1->STMN1	2->
FUS_26227101_551673840(++)	8	9	2	++	1	26227102	12	31881905	STMN1	NM_203399_chr1,NM_005563_chr1,NM_203401_chr1	5,5,5	---	AMN1	NM_001113402_chr12	1	-	GTTTTATTAACCATTCAAGTCCAGTAGCATagatccaggagctgactgacccgccgtggg	CT-AC	AMN1->STMN1	1->
FUS_26774150_1036093616(++)	18	3	18	++	1	26774151	16	57398897	DHDDS	NM_024887_chr1,NM_205861_chr1	6,6	++	CCL22	NM_002990_chr16	3	+	GGGGGTGGAGCAAGGCCTGTTGGATCCCAGtagagacaggtttcaccatattggccaggc	GT-AG	DHDDS->CCL22	1->
FUS_31984436_925327666(+-)	3	1	2	+-	1	31984437	15	49164339	LOC284551	NR_027085_chr1	1	+	SHC4	NM_203349_chr15	5	-	AGACAGCCTATTGTGGGACCTTGTGATCATattattgcaaatcatcatatgcagtctatt	GT-AG	LOC284551->SHC4	->0
FUS_31989150_45796187(-+)	10	1	9	-+	1	31989151	1	45796188	LOC284551	NR_027085_chr1	3	+	MUTYH	NM_012222_chr1,NM_001128425_chr1,NM_001048172_chr1,NM_001048174_chr1,NM_001048173_chr1,NM_001048171_chr1	15,15,15,15,15,15	------	CCTAGGCAACATGGTGAAACCCTGTCTCTAcatacaggtccctggctgttggccctgata	CT-AC	MUTYH->LOC284551	2->
FUS_32053063_588834416(++)	28	22	28	++	1	32053064	12	69042481	TINAGL1	NM_022164_chr1	12	+	RAP1B	NM_001010942_chr12,NM_015646_chr12	2,2	++	TCAGCCTCTCAAGTAGCTGGGACTACAGGTactaggttttgacaagcttgcatcatgcgt	GC-GT	TINAGL1->RAP1B	->
FUS_33068294_1283811167(++)	8	1	7	++	1	33068295	19	55489120	ZBTB8A	NM_001040441_chr1	5	+	NLRP2	NM_001174083_chr19,NM_017852_chr19,NM_001174082_chr19,NM_001174081_chr19	5,4,4,4	++++	CTCAGCCTCCCGAGTAGCTGGGACTTACAGggataacacggaaagaacgaccacctctag	GC-AG	ZBTB8A->NLRP2	->1
FUS_33145240_1231917299(-+)	1	1	0	-+	1	33145241	19	3595252	RBBP4	NM_005610_chr1,NM_001135256_chr1,NM_001135255_chr1	12,12,12	+++	TBXA2R	NM_001060_chr19	3	-	AGGGTCTTCATCATTATAAATGTTCTCTGCctatagtcccagctactcaggaggctgagg	CT-GC	TBXA2R->RBBP4	->0
FUS_35320161_1478121551(+-)	5	1	4	+-	1	35320162	2	190670480	C1orf212	NM_001164824_chr1,NM_001164825_chr1,NM_138428_chr1	3,2,2	---	PMS1	NM_001128143_chr2,NM_000534_chr2,NM_001128144_chr2	4,4,4	+++	GCACTCCAGCCTGTGTGACAGAGTGAGACCcttgaccaagatgtgaaggtttctgagaaa	CT-AC	PMS1->C1orf212	0->
FUS_35449547_35457834(++)	3	1	2	++	1	35449548	1	35457835	LOC100130633	NM_001195156_chr1	2	-	ZMYM6	NM_007167_chr1	15	-	CACCTCAGCAAACTGCACGAACAGGGCATTctgtctgacattctttgtgctgtgtatgtg	CT-AC	ZMYM6->LOC100130633	0->0
FUS_35452170_2161696743(--)	7	2	5	--	1	35452171	5	79409448	ZMYM6	NM_007167_chr1	16	-	SERINC5	NM_001174071_chr5,NM_178276_chr5	12,12	--	TAGCTGGGGTTACAGGCATGTGCCACCATGaagtgcctttcacctcctgccatgattctg	CC-AG	ZMYM6->SERINC5	->2
FUS_39880148_39888045(++)	7	2	5	++	1	39880149	1	39888046	KIAA0754	NM_015038_chr1	1	+	MACF1	NM_012090_chr1,NM_033044_chr1	55,23	++	GCTGCAACCGCTGGATTAAATTCAGATGAGatgtttcagaaagaacaagtggatcctctt	GT-AG	KIAA0754->MACF1	2->0
FUS_45297646_65895544(-+)	1	8	0	-+	1	45297647	1	65895545	PTCH2	NM_003738_chr1,NM_001166292_chr1	4,4	--	LEPROT	NM_017526_chr1,NM_001198681_chr1	3,4	++	CCCCTTATTGAAAATGGAATGATTGAGCGGcgtttactggcccttattcgtcctgatttt	GT-AG	PTCH2->LEPROT	2->2
FUS_47059951_47082382(++)	31	14	30	++	1	47059952	1	47082383	MKNK1	NM_001135553_chr1,NM_198973_chr1,NR_024174_chr1,NM_003684_chr1,NR_024176_chr1	2,2,2,2,2	-----	MOBKL2C	NM_201403_chr1	1	-	CAGTTCTCCATTGGCCTCTGACATGGAAACgggtcctcttctggccgtggggtcacattc	CT-AC	MOBKL2C->MKNK1	->
FUS_47131035_47148971(++)	3	1	2	++	1	47131036	1	47148972	ATPAF1	NM_001042546_chr1,NM_022745_chr1	2,2	--	KIAA0494	NM_014774_chr1	10	-	AGGCGGGACTCAAAAGCAGCTGGGTCTGACcttcagtgctagaaactcctggtagggaga	CT-AC	KIAA0494->ATPAF1	0->2
FUS_54618853_54649833(++)	2	1	1	++	1	54618854	1	54649834	CDCP2	NM_201546_chr1	1	-	CYB5RL	NM_001031672_chr1	6	-	CACACTATCAGGAAGGGAAGGAACTCAGGCctggtttggtttatagaagaaatctccgaa	CT-AC	CYB5RL->CDCP2	2->
FUS_67725418_2535193822(+-)	8	6	3	+-	1	67725419	7	100876191	IL23R	NM_144701_chr1	11	+	CLDN15	NM_001185080_chr7,NM_014343_chr7	4,3	--	TAATCCCAGCACTTTGGTAGGCTGAGGTAGctgcgggatggtggccatctcctggtacgc	GT-AT	IL23R->CLDN15	->2
FUS_78211283_2859195877(++)	11	2	11	++	1	78211284	9	119375526	USP33	NM_015017_chr1,NM_201626_chr1	2,2	--	ASTN2	NM_001184735_chr9	5	-	TTTCCATGTTTAGTGCTTCCTTCAGGAGCTcaaaataagtccaggaccagatggattcac	CT-AC	ASTN2->USP33	->
FUS_87569271_87599296(++)	9	2	8	++	1	87569272	1	87599297	HS2ST1	NM_012262_chr1	6	+	LOC339524	NR_026988_chr1,NR_026989_chr1,NR_026985_chr1,NR_026986_chr1,NR_026987_chr1	2,2,3,2,2	+++++	TCAGGGGTGCTACTGAACTCTATCGCACAGcaccagatactgctacaccatctcatcggc	GT-AG	HS2ST1->LOC339524	0->
FUS_90152169_90309196(++)	14	7	12	++	1	90152170	1	90309197	LRRC8C	NM_032270_chr1	2	+	LRRC8D	NM_001134479_chr1,NM_018103_chr1	2,2	++	ATGATCGGCGTGTTTGGATGTACTTTACAGgaagtgcacggctgtctataacgtgctgcc	GT-AG	LRRC8C->LRRC8D	2->
FUS_92428277_979822372(-+)	5	2	4	-+	1	92428278	16	1127653	BRDT	NM_001726_chr1,NM_207189_chr1	2,2	++	LOC146336	NR_027242_chr16	2	-	AACTGCTTTGAATCCTGTCTACAAGTACATgtcctcaggtgatccacccgcctcggcctc	GT-CT	LOC146336->BRDT	->
FUS_95558167_2526097479(-+)	3	2	1	-+	1	95558168	7	91779848	TMEM56	NM_001199679_chr1	1	+	LOC401387	NM_001161528_chr7	3	-	CTTGCTGGCTTCAGGAGTGAAGCTGCAGACcatctctttcatctgccctctgtagatagc	CT-AC	LOC401387->TMEM56	0->
FUS_100231026_1498335469(-+)	19	1	24	-+	1	100231027	2	210884398	FRRS1	NM_001013660_chr1	1	-	RPE	NM_006916_chr2,NM_199229_chr2	6,6	++	GCCTCCTGAGTAGCTGGGATTACAGGCAGGagctaacatgattgtgtctggcagtgctat	CA-GG	FRRS1->RPE	->2
FUS_109392197_109505982(++)	3	1	2	++	1	109392198	1	109505983	AKNAD1	NM_152763_chr1	3	-	CLCC1	NM_015127_chr1,NM_001048210_chr1	1,1	--	TTCTTGGTGGATATGTACTATGGGCTCCATgtccgggatcccctgcctgcctctcgagga	CT-AC	CLCC1->AKNAD1	->0
FUS_111833571_2621411055(++)	9	2	7	++	1	111833572	8	27954736	CHIA	NM_201653_chr1,NM_021797_chr1	1,1	++	ELP3	NM_018091_chr8	2	+	CCAGTCTGGTGGTGAATCCTCCATAGTCTGgagatctcagccctgctgagctgatgatgc	GT-AG	CHIA->ELP3	->1
FUS_152770248_152779076(-+)	2	1	1	-+	1	152770249	1	152779077	LCE1D	NM_178352_chr1	2	+	LCE1C	NM_178351_chr1	1	-	CAGGACATCTCGGTGGTGGGTGTTCAGGAGcggggtcacaggcagcacagggtccttcag	CT-AC	LCE1C->LCE1D	->
FUS_154454484_526738089(-+)	1	1	0	-+	1	154454485	12	6946154	SHE	NM_001010846_chr1	6	-	LEPREL2	NM_014262_chr12	10	+	TCCATCTCAAAAAAAAAAAAAAAAAAAAGCagctggggctggagccaggtctggctatcg	CT-GC	SHE->LEPREL2	->1
FUS_154946723_1526512101(-+)	2	2	1	-+	1	154946724	2	239061030	SHC1	NM_001130041_chr1,NM_003029_chr1	1,1	--	KLHL30	NM_198582_chr2	8	+	GGTGCGGTGCGGAGACTCCATGAGGCCCTGacggagtctcgctcttgtcgtccaggctgg	GT-AG	SHC1->KLHL30	->
FUS_156509781_790851693(++)	2	4	0	++	1	156509782	14	22037934	IQGAP3	NM_178229_chr1	24	-	OR10G3	NM_001005465_chr14	1	-	GGTCAGCTTCTTGCAGTGGGAGACCACTTCtcaaacctcactcggagttcttgggcttct	CT-TT	OR10G3->IQGAP3	->0
FUS_159828080_159842733(++)	11	5	7	++	1	159828081	1	159842734	VSIG8	NM_001013661_chr1	3	-	CCDC19	NM_012337_chr1	11	-	GTTGATCCTCTTGTCCTGGTAACTAAGGAActcagctcttcaagctttttcctcttgatc	CT-AC	CCDC19->VSIG8	1->0
FUS_159828523_159842734(++)	7	1	7	++	1	159828524	1	159842735	VSIG8	NM_001013661_chr1	2	-	CCDC19	NM_012337_chr1	11	-	TTGATCCTCTTGTCCTGGTAACTAAGGAACtcagctcttcaagctttttcctcttgatct	AC-CC	CCDC19->VSIG8	0->2
FUS_159828701_159842733(++)	19	5	22	++	1	159828702	1	159842734	VSIG8	NM_001013661_chr1	2	-	CCDC19	NM_012337_chr1	11	-	CCCCGTTGATCCGCACAGCAGACAGCAGTGctcagctcttcaagctttttcctcttgatc	CT-AC	CCDC19->VSIG8	1->1
FUS_160971142_161008669(++)	5	2	6	++	1	160971143	1	161008670	F11R	NM_016946_chr1	2	-	TSTD1	NM_001113205_chr1,NM_001113206_chr1,NM_001113207_chr1	1,1,1	---	GCACTGTAACACTGCCCAATGCCAGGGAGCctccagccatggtgcgcgtagcaaccgcga	CT-AC	TSTD1->F11R	0->1
FUS_160990799_3014657756(-+)	2	182	0	-+	1	160990800	X	133607389	F11R	NM_016946_chr1	1	-	HPRT1	NM_000194_chrX	2	+	TGTGCCTCTTCATATTGGCGATCCTGTTGTattagtgatgatgaaccaggttatgacctt	GT-AG	F11R->HPRT1	0->0
FUS_162336993_162351680(++)	24	11	17	++	1	162336994	1	162351681	NOS1AP	NM_014697_chr1,NM_001164757_chr1,NM_001126060_chr1	10,10,2	+++	C1orf226	NM_001085375_chr1,NM_001135240_chr1	1,2	++	ACTTTGCCCACCCTGCGGGCAGCCCCTTAGttgaccacggcatgtttgagaatttgaaca	GT-AG	NOS1AP->C1orf226	0->1
FUS_162337252_162351680(++)	9	3	6	++	1	162337253	1	162351681	NOS1AP	NM_014697_chr1,NM_001164757_chr1,NM_001126060_chr1	10,10,2	+++	C1orf226	NM_001085375_chr1,NM_001135240_chr1	1,2	++	GGGCGACGGCCTGGATGATGAGATCGCCGTttgaccacggcatgtttgagaatttgaaca	GT-AG	NOS1AP->C1orf226	1->1
FUS_169080735_2222649355(++)	1	4	0	++	1	169080736	5	140362060	ATP1B1	NM_001677_chr1	2	+	PCDHA1,PCDHA1,PCDHA2,PCDHA3,PCDHA4,PCDHA5,PCDHA6,PCDHA6,PCDHA7,PCDHA8,PCDHA9,PCDHA10,PCDHA10,PCDHA11,PCDHA12,PCDHA13,PCDHAC1,PCDHAC2	NM_031411_chr5,NM_018900_chr5,NM_018905_chr5,NM_018906_chr5,NM_018907_chr5,NM_018908_chr5,NM_031849_chr5,NM_018909_chr5,NM_018910_chr5,NM_018911_chr5,NM_031857_chr5,NM_018901_chr5,NM_031860_chr5,NM_018902_chr5,NM_018903_chr5,NM_018904_chr5,NM_018898_chr5,NM_018899_chr5	3,3,3,3,3,3,3,3,3,3,3,3,3,3,3,3,3,3	++++++++++++++++++	CCACATATCAGGACCGAGTGGCCCCGCCAGctctgtgcacctagaggaggctggcattct	GT-AG	ATP1B1->PCDHA1,PCDHA1,PCDHA2,PCDHA3,PCDHA4,PCDHA5,PCDHA6,PCDHA6,PCDHA7,PCDHA8,PCDHA9,PCDHA10,PCDHA10,PCDHA11,PCDHA12,PCDHA13,PCDHAC1,PCDHAC2	0->2
FUS_200080329_231990489(++)	15	2	15	++	1	200080330	1	231990490	NR5A2	NM_003822_chr1,NM_205860_chr1	5,6	++	DISC1	NM_001164539_chr1	10	+	GGAGTAGTATCTTCTTCAGAGAACTTAAGGgtctcactctgtcgcccagtctggagtgca	TT-GA	NR5A2->DISC1	0->0
FUS_204392450_1117232270(-+)	9	3	8	-+	1	204392451	17	48182735	PIK3C2B	NM_002646_chr1	34	-	PDK2	NM_002611_chr17	3	+	CCTCAGCCTCCCGAGTAGCTGGGATTACAGgtatgtccagagcctcctggacatcatgga	GC-AG	PIK3C2B->PDK2	->2
FUS_206288104_2891586010(--)	1	1	0	--	1	206288105	X	10535643	C1orf186	NM_001007544_chr1	1	-	MID1	NM_033290_chrX,NM_001193278_chrX,NM_001193279_chrX,NM_001193280_chrX,NM_001193281_chrX,NM_001193277_chrX,NM_000381_chrX,NM_033289_chrX,NM_001098624_chrX	2,1,1,1,1,2,2,2,2	---------	GGCACTTGGAGTCCGGACATCTGAAACTTGatagctgatcagcttccttgggttttgctg	GT-AG	C1orf186->MID1	->
FUS_207288760_232176016(--)	2	1	1	--	1	207288761	1	232176017	C4BPA	NM_000715_chr1	4	+	TSNAX-DISC1,DISC1,DISC1,DISC1,DISC1	NR_028393_chr1,NM_001164537_chr1,NM_001012957_chr1,NM_018662_chr1,NM_001164540_chr1	16,14,13,13,11	+++++	GTAACTCTCCTGGGTGTCTGCATCGTTTGTctgtaatctcagcactttgggaagccgagg	CT-AC	TSNAX-DISC1,DISC1,DISC1,DISC1,DISC1->C4BPA	->1
FUS_211444577_2564123265(-+)	2	1	2	-+	1	211444578	7	129805634	RCOR3	NM_001136224_chr1,NM_018254_chr1,NM_001136225_chr1,NM_001136223_chr1	3,2,3,3	++++	TMEM209	NM_032842_chr7	15	-	CCTCCATTGTCTTTATCTGTGTACTTTGTAgcacctataatcccagcactttgggaggcc	GC-TC	TMEM209->RCOR3	->2
FUS_211650769_2533326438(+-)	9	3	7	+-	1	211650770	7	99008807	RD3	NM_183059_chr1,NM_001164688_chr1	3,3	--	BUD31	NM_003910_chr7	3	+	AGCCGAGATCACGCCACTGCACTGCAGCCTtctctcatcttttgatctaattcatccagt	GG-CT	BUD31->RD3	1->
FUS_222919872_2423302807(-+)	7	2	5	-+	1	222919873	6	160100248	FAM177B	NM_207468_chr1	3	+	SOD2	NM_001024465_chr6,NM_001024466_chr6	6,5	--	ACCGTCAATCTCCATAATGAAACAAAACAActtatagggttttcagtatgtaccaggctt	CT-AC	SOD2->FAM177B	->
FUS_224505395_1849368918(--)	2	1	1	--	1	224505396	3	156258391	NVL	NM_206840_chr1,NM_002533_chr1	3,4	--	SSR3	NM_007107_chr3	5	-	AAGGGCAAGACAAGGTGAAGAGGATAATGAacagcgtctcgctctgtcacccaggctgga	GT-AG	NVL->SSR3	1->
FUS_226075729_226108318(++)	2	1	1	++	1	226075730	1	226108319	LEFTY1	NM_020997_chr1	2	-	PYCR2	NM_013328_chr1	7	-	GGCCTCCAACGCCAGGAACCTGCCGGCCACctcgtgttcggatacaggaggcctcaactg	CT-CT	PYCR2->LEFTY1	0->0
FUS_226075731_226108907(++)	4	3	1	++	1	226075732	1	226108908	LEFTY1	NM_020997_chr1	2	-	PYCR2	NM_013328_chr1	6	-	CCTCCAACGCCAGGAACCTGCCGGCCACCTcgtgttcggatacaggaggcctcaactgca	CT-AC	PYCR2->LEFTY1	1->1
FUS_231990604_467493773(+-)	17	4	16	+-	1	231990605	11	82708366	DISC1	NM_001164539_chr1	10	+	RAB30	NM_014488_chr11	3	-	CCTCAGCCTCCGGAGTAGCTGGGATTACAGctgtgtaaatgagtatggaagattatgatt	GT-AG	DISC1->RAB30	1->
FUS_239792483_1128016592(++)	14	2	13	++	1	239792484	17	58967057	CHRM3	NM_000740_chr1	1	+	BCAS3	NM_017679_chr17,NM_001099432_chr17	10,10	++	CTCCGTGGGCGTAGGACCCTCCGAGCCAGGctgctatccatgtccagggccaaacatgaa	TG-GG	CHRM3->BCAS3	->2
FUS_239792572_541319389(+-)	10	7	6	+-	1	239792573	12	21527454	CHRM3	NM_000740_chr1	1	+	SLCO1A2	NM_134431_chr12	2	-	GGGTGGGAGTGACCCGATTTTCCAGGTGCTgtagaaatctttgcatattgctatgggctt	TC-CT	CHRM3->SLCO1A2	->
FUS_245285342_2738226483(++)	4	1	3	++	1	245285343	8	144770164	EFCAB2	NR_026587_chr1,NM_001143943_chr1,NR_026586_chr1	6,7,8	+++	ZNF707	NM_173831_chr8	2	+	CCTCAGCCTCCTGAGCAGCTGGGATGACAGatggagtctcactctgttgcccaggctgga	GC-AG	EFCAB2->ZNF707	->
FUS_247162649_1173841321(--)	5	2	3	--	1	247162650	18	23596522	ZNF695	NM_020394_chr1	3	-	SS18	NM_001007559_chr18,NM_005637_chr18	11,10	--	TGAACACAGAGAAGACAGCCAGACACTCAGtagagacgaggtttcgccatgttggccagg	GT-AG	ZNF695->SS18	0->
FUS_249132749_1267755149(-+)	11	3	10	-+	1	249132750	19	39433102	ZNF672	NM_024836_chr1	1	+	FBXO17	NM_024907_chr19,NM_148169_chr19	6,6	--	GGCAAAAGGGTCACGCTTGAAGTGGAAACCatgttgcccaggctggtcttgaactcccga	GG-CT	FBXO17->ZNF672	->
FUS_249623572_2854802953(--)	2	1	1	--	10	372949	9	114982602	DIP2C	NM_014974_chr10	31	-	ROD1	NM_005156_chr9,NM_001163788_chr9,NM_001163790_chr9	15,14,15	---	GGTTGCAGGGTGAACCTGGCGATTTGCTTGcagtgctgggattacaggcatgagccacca	CA-CA	DIP2C->ROD1	2->
FUS_250292595_1372724298(++)	1	1	0	++	10	1041972	2	85273227	GTPBP4	NM_012341_chr10	3	+	KCMF1	NM_020122_chr2	5	+	AATAAATATTGCCAAAAATTTAGTGGACAAgatgaatcgagtggtgttcgacatgtacgt	GT-AT	GTPBP4->KCMF1	1->0
FUS_255516799_1110080723(+-)	3	1	2	+-	10	6266176	17	41031188	PFKFB3	NM_004566_chr10,NM_001145443_chr10	13,13	++	LOC388387	NR_027254_chr17	4	-	TCCGTCTGCACACACCGGGAGAGGTCAGAGggtctcactctgttgcccaggctggagtgc	GT-AG	PFKFB3->LOC388387	2->
FUS_264339748_1549419147(-+)	1	1	0	-+	10	15089125	20	18768652	OLAH	NM_018324_chr10,NM_001039702_chr10	2,2	++	HSPC072	NR_026883_chr20,NR_026884_chr20	4,3	--	GGCGCTGACTCTTATTGACCTCTCCAATCCagttccacatggctggggaggcctcacaat	CT-AC	HSPC072->OLAH	->
FUS_264394958_1299356730(++)	16	1	16	++	10	15144335	2	11905659	RPP38	NM_001097590_chr10,NM_183005_chr10	2,2	++	LPIN1	NM_145693_chr2	2	+	CCTCAGCCTCCCAAGTAGCTGGGACTACAGgtgcagaccatgaattacgtggggcagtta	GT-AG	RPP38->LPIN1	->
FUS_271856108_271865983(++)	11	3	11	++	10	22605485	10	22615360	COMMD3	NM_012071_chr10	1	+	BMI1	NM_005180_chr10	2	+	TGGACGCCCAGGCGGACGAGGCCGTGTTAGgattttttatcaagcagaaatgcatcgaac	GT-AG	COMMD3->BMI1	0->
FUS_274565573_2533300956(++)	20	5	23	++	10	25314950	7	98983325	THNSL1	NM_024838_chr10	3	+	ARPC1B	NM_005720_chr7	2	+	CCTCAGCCTCCCAGGTAGCTGGGATTACAGgagccaagccgccatggcctaccacagctt	GC-AG	THNSL1->ARPC1B	->
FUS_295279358_573229069(++)	1	1	0	++	10	46028735	12	53437134	2008-03-01	NM_001002265_chr10,NM_001002266_chr10,NM_145021_chr10	3,2,2	---	LOC283335	NR_033854_chr12	4	-	TGGTAGAGTCATTTTGGGCCATGGATTTCAagctgtaatcccagcactttgggaggccaa	AG-AC	LOC283335->MARCH8	->
FUS_295279360_510143724(++)	8	5	6	++	10	46028737	11	125358317	2008-03-01	NM_001002265_chr10,NM_001002266_chr10,NM_145021_chr10	3,2,2	---	FEZ1	NM_022549_chr11	2	-	GTAGAGTCATTTTGGGCCATGGATTTCAAGctgtaatcccagcactttgggaggccaagg	CT-GC	FEZ1->MARCH8	->
FUS_295299273_344007995(+-)	1	1	0	+-	10	46048650	10	94757372	2008-03-01	NM_001002265_chr10	2	-	EXOC6	NM_001013848_chr10,NM_019053_chr10	19,19	++	ACCAGTCTGGGCAACACAGCAAGACCCCATattcacactgtatgacatctaagttaaact	CT-AC	EXOC6->MARCH8	0->
FUS_300209654_510948357(+-)	2	99	0	+-	10	50959031	11	126162950	OGDHL	NM_018245_chr10,NM_001143996_chr10,NM_001143997_chr10	7,6,5	---	TIRAP	NM_001039661_chr11,NM_148910_chr11	5,5	++	GACCATTTCCGGGCCAGGAAGTCTTCAAACaacgcatgacagcttctttgacttgacgaa	CT-AC	TIRAP->OGDHL	0->2
FUS_301213213_301750364(+-)	4	1	3	+-	10	51962590	10	52499741	ASAH2	NM_001143974_chr10,NM_019893_chr10	14,15	--	ASAH2B	NM_001079516_chr10	1	+	TTGTCGATGCTGCCTCATATCGCTGAGCCTgttcacaattgcgactcctcaggtccgctt	GG-CT	ASAH2B->ASAH2	->1
FUS_323221212_822056234(++)	15	3	15	++	10	73970589	14	53242475	ASCC1	NM_001198798_chr10,NM_015947_chr10,NM_001198799_chr10,NM_001198800_chr10	3,3,3,3	----	GNPNAT1	NM_198066_chr14	6	-	CACAGGGCTCATCAGCACACTCCATGGAGCctgtagttccagctactggggaggctgagg	CT-AC	GNPNAT1->ASCC1	->1
FUS_324411238_451219920(+-)	1	1	0	+-	10	75160615	11	66434513	ANXA7	NM_001156_chr10,NM_004034_chr10	2,2	--	RBM4	NM_001198844_chr11	3	+	CCTGTTGGGGGATAGCCTGGGTATGACATTctgtagtcccaactattcaggaagctgagg	CT-GC	RBM4->ANXA7	->
FUS_328939133_573345347(-+)	2	1	1	-+	10	79688510	12	53553412	LOC100128292	NR_024585_chr10	1	+	CSAD	NM_015989_chr12	16	-	GTGCTGGGATTACAGGCGTGAGCCACTTTGacagcctttcgtggtaatctggactctcct	CC-TG	CSAD->LOC100128292	0->
FUS_330301556_2568663830(++)	2	52	0	++	10	81050933	7	134346199	ZMIZ1	NM_020338_chr10	10	+	BPGM	NM_199186_chr7,NM_001724_chr7	3,2	++	CTACCCCGGCAGCGGGGGCTTTGGGGCCAGatgtattgctgtccttgaatattagcccat	GT-AG	ZMIZ1->BPGM	1->
FUS_337946252_1679346196(--)	3	3	0	--	10	88695629	22	37540245	MMRN2	NM_024756_chr10	7	-	IL2RB	NM_000878_chr22	2	-	TTCCTGAGGCCTCCCCAGCCATGTGGAACAggcttccttcctcggctccaccctgtggat	GT-AG	MMRN2->IL2RB	->
FUS_340388436_1821822413(-+)	2	66	0	-+	10	91137813	3	128711886	IFIT1B	NM_001010987_chr10	1	+	KIAA1257	NM_020741_chr3	2	-	GGCTCCTTCAAGGTTCATCCACAGAGTTCTccatattcacagggaaggccagtgagatgg	AG-AC	KIAA1257->IFIT1B	0->
FUS_341912361_2258801326(--)	5	3	2	--	10	92661738	5	176514031	RPP30	NM_006413_chr10	11	+	FGFR4	NM_002011_chr5,NM_213647_chr5	1,1	++	CCTGGCTAACACGGTGAAACCCCGTCTCTGgctcctcctcacctggctcctccgccgcct	CT-TG	FGFR4->RPP30	->
FUS_346501500_1750722838(++)	5	1	4	++	10	97250877	3	57612311	SORBS1	NM_015385_chr10,NM_024991_chr10	2,2	--	FAM116A	NM_152678_chr3	20	-	TTCACGAACTCTTCCAAAGGATGCCAACTCctgtaatcccagctactcaggaggctgagg	CT-AC	FAM116A->SORBS1	->
FUS_348491322_961484741(-+)	7	1	6	-+	10	99240699	15	85321414	MMS19	NM_022362_chr10	3	-	ZNF592	NM_014630_chr15	3	+	ACTGTCACACCTTGCTCCTGGAGAAGGAAGgagcggagagtttaataggcaagaaggaag	GT-AG	MMS19->ZNF592	0->
FUS_348612367_348651555(++)	1	1	0	++	10	99361744	10	99400932	DHDPSL	NM_001134670_chr10,NM_138413_chr10	2,6	++	PI4K2A	NM_018425_chr10	1	+	CTGCAGCACCGCCTCATTGAGCCAAACGCTgggaggatcattgctgtcttcaaacccaag	GC-AG	DHDPSL->PI4K2A	2->0
FUS_348612370_348661321(++)	12	3	11	++	10	99361747	10	99410698	DHDPSL	NM_001134670_chr10,NM_138413_chr10	2,6	++	PI4K2A	NM_018425_chr10	2	+	CAGCACCGCCTCATTGAGCCAAACGCTGCGaggatcattgctgtcttcaaacccaagaat	GT-AG	DHDPSL->PI4K2A	2->0
FUS_351527340_351536779(++)	5	1	4	++	10	102276717	10	102286156	SEC31B	NM_015490_chr10	2	-	NDUFB8	NM_005004_chr10	4	-	GCTCAAGTTCCTTCAGCTTCATGGTCTATCcacaggctggtagacagggtacacgtcccc	CT-AC	NDUFB8->SEC31B	2->
FUS_351527340_351537355(++)	9	1	10	++	10	102276717	10	102286732	SEC31B	NM_015490_chr10	2	-	NDUFB8	NM_005004_chr10	3	-	GCTCAAGTTCCTTCAGCTTCATGGTCTATCcggttcaccccagttcaacctcaggcccgg	CT-AC	NDUFB8->SEC31B	2->
FUS_353481775_1215421064(+-)	6	1	5	+-	10	104231152	18	65176265	TMEM180	NM_024789_chr10	6	+	DSEL	NM_032160_chr18	2	-	CCTGTGGTTCGTGAGCATGGACCTGGTGCAggtgcagtggctcacgcctgtaatcccagc	GG-CG	TMEM180->DSEL	1->
FUS_353483234_1215421062(+-)	6	1	5	+-	10	104232611	18	65176263	TMEM180	NM_024789_chr10	7	+	DSEL	NM_032160_chr18	2	-	TGTGGTTCGTGAGCATGGACCTGGTGCAGGtgcagtggctcacgcctgtaatcccagcac	TC-GG	TMEM180->DSEL	0->
FUS_361880868_1812499039(--)	3	1	2	--	10	112630245	3	119388512	LOC282997	NR_026932_chr10	1	-	COX17	NM_005694_chr3	3	-	CCTCAGCCTCCTGAGTAACTGGGACTACAGgtggtctgctgtgtgaataaataattcctg	GC-AG	LOC282997->COX17	->
FUS_368498880_1687016503(-+)	7	4	3	-+	10	119248257	22	45210552	EMX2OS	NR_002791_chr10	4	-	PRR5-ARHGAP8,ARHGAP8,ARHGAP8,ARHGAP8	NM_181334_chr22,NM_001198726_chr22,NM_001017526_chr22,NM_181335_chr22	8,5,6,5	++++	CCTGTAATCCCAGTACTTTGGGAGGCCAAGgtacaagaagaacttgaaggccctctacgt	GC-AG	EMX2OS->PRR5-ARHGAP8,ARHGAP8,ARHGAP8,ARHGAP8	->2
FUS_374778861_1142987922(++)	2	1	1	++	10	125528238	17	73938387	CPXM2	NM_198148_chr10	9	-	ACOX1	NM_007292_chr17,NM_004035_chr17,NM_001185039_chr17	14,14,14	---	CCCCCGCGATGTAGTGGAACTCGGGCTCACctgtaatcccagcttctcaggaggctgagg	CT-CG	ACOX1->CPXM2	->1
FUS_384375966_384411551(++)	3	1	2	++	10	135125343	10	135160928	ZNF511	NM_145806_chr10	5	+	PRAP1	NM_145202_chr10,NM_001145201_chr10	1,1	++	CCGGCAGGTGAGAGGCGGATCTACAGACATaggctcctcctggtcaccagcctggtggtt	AG-GG	ZNF511->PRAP1	2->0
FUS_384375968_384414222(++)	3	2	2	++	10	135125345	10	135163599	ZNF511	NM_145806_chr10	5	+	PRAP1	NM_145202_chr10,NM_001145201_chr10	2,2	++	GGCAGGTGAGAGGCGGATCTACAGACATAGgctcctcctggtcaccagcctggtggttgt	GT-AG	ZNF511->PRAP1	1->2
FUS_384991018_1891005074(-+)	13	3	13	-+	11	205611	3	197894547	BET1L	NM_001098787_chr11,NM_016526_chr11	3,3	--	FAM157A	NM_001145248_chr3	5	+	GAGGATCAGAACCGGTACCTGGATGGCATGgtatttcaggacagccaggagggggcgcac	GT-AG	BET1L->FAM157A	2->0
FUS_385459943_940610725(-+)	2	1	1	-+	11	674536	15	64447398	DEAF1	NM_021008_chr11	10	-	SNX22	NM_024798_chr15	7	+	AAGATCCACGCTGACGCAGAGCGGAAGGAGgtgatccacccgcctcggcttcccaaagtg	GT-AG	DEAF1->SNX22	2->
FUS_386554756_386560440(++)	9	3	6	++	11	1769349	11	1775033	LOC402778	NM_001170820_chr11	1	-	CTSD	NM_001909_chr11	8	-	CGGGGCTGGGCACTGGCCGGGGCCCTGGGCcttgagcgtgtagtcctctggggacagctt	CT-AC	CTSD->LOC402778	2->
FUS_388634843_979809325(++)	5	1	4	++	11	3849436	16	1114606	RHOG	NM_001665_chr11	2	-	LOC146336	NR_027242_chr16	4	-	TCTCTTCTGGACCCCTCTGGCTGCAGTGACacctgtagtcccagctactcgggaggctga	CT-GC	LOC146336->RHOG	->
FUS_390491505_974449908(--)	11	5	9	--	11	5706098	15	98286581	TRIM5	NM_033092_chr11,NM_033034_chr11	1,1	--	LOC91948	NR_024173_chr15,NR_024172_chr15	2,3	--	AGTCTTTGGGACAAAACTGTATTTACCTTGaatgaagccgcggaccctcgcagtgagtgt	GT-AG	TRIM5->LOC91948	->
FUS_391288924_391303967(++)	13	2	13	++	11	6503517	11	6518560	FXC1	NM_012192_chr11	3	+	DNHD1	NM_144666_chr11,NM_173589_chr11	1,1	++	CCCTCAGATTGAAGGACCCGGTGGACCTTGgggcgatcgccagctcgagtgcagattcct	GG-GC	FXC1->DNHD1	->
FUS_391288926_391304222(++)	16	6	13	++	11	6503519	11	6518815	FXC1	NM_012192_chr11	3	+	DNHD1	NM_144666_chr11,NM_173589_chr11	2,2	++	CTCAGATTGAAGGACCCGGTGGACCTTGGGgcgatcgccagctcgagtgcagattccttg	GT-AG	FXC1->DNHD1	->
FUS_391288926_391309390(++)	17	6	11	++	11	6503519	11	6523983	FXC1	NM_012192_chr11	3	+	DNHD1	NM_144666_chr11,NM_173589_chr11	4,3	++	CTCAGATTGAAGGACCCGGTGGACCTTGGGgtctcagcttgactatgaagttcccaggga	GT-AG	FXC1->DNHD1	->2
FUS_393421166_529639293(-+)	7	1	7	-+	11	8635759	12	9847358	TRIM66	NM_014818_chr11	20	-	CLEC2D	NR_036693_chr12,NM_001197317_chr12,NM_001197318_chr12,NM_013269_chr12,NM_001004419_chr12,NM_001197319_chr12	4,4,4,5,6,3	++++++	TCAGCCTCCTGAGTAGCTGGGACTACAGGTttcctatcctgggagcaggagagtgtgcct	GC-GT	TRIM66->CLEC2D	->12
FUS_395459136_2689340432(-+)	2	1	1	-+	11	10673729	8	95884113	MRVI1	NM_001100167_chr11,NM_001098579_chr11	3,1	--	INTS8	NM_017864_chr8	21	+	CTCAGCCTCCCAAGTAGCTGGGATTACAGCctccagtctgtggactttgaagctgtggca	CT-GC	MRVI1->INTS8	1->0
FUS_399305938_399312110(++)	23	5	21	++	11	14520531	11	14526703	COPB1	NM_016451_chr11,NM_001144061_chr11,NM_001144062_chr11	2,2,2	---	PSMA1	NM_148976_chr11,NM_002786_chr11	11,10	--	TTGACACAAGATTTAAGGATGCCAGAAAATatatttgataatacatatatagactggctt	CT-AC	PSMA1->COPB1	->
FUS_401559848_1733641451(++)	16	3	16	++	11	16774441	3	40530924	C11orf58	NM_014267_chr11	4	+	ZNF619	NM_001145082_chr3,NM_001145093_chr3,NR_026746_chr3	6,5,6	+++	CGGCGACATTGTGGACTTGGCTTCAGTGAGagacagagttttgccatgttgcccaggctg	GT-AG	C11orf58->ZNF619	2->
FUS_401563247_1975530822(-+)	5	3	2	-+	11	16777840	4	84397831	C11orf58	NM_014267_chr11	5	+	FAM175A	NM_139076_chr4	3	-	ACTCCAGCCTGGGCGACAGAATGAGACTCCgtcaattgtataaacaacttcaacatcatc	GT-AT	FAM175A->C11orf58	2->
FUS_402102283_1109008533(-+)	9	3	7	-+	11	17316876	17	39958998	NUCB2	NM_005013_chr11	3	+	LEPREL4	NM_006455_chr17	8	-	AAGCAATACTGTAGCAGGATGGTCCTCCACctcatcatgttggccaggctggtcttgaac	CT-GT	LEPREL4->NUCB2	->2
FUS_403206385_1252428526(--)	4	1	3	--	11	18420978	19	24106479	LDHA	NM_001165416_chr11,NM_005566_chr11,NM_001135239_chr11,NM_001165415_chr11,NM_001165414_chr11	3,3,3,3,3	+++++	ZNF726	NM_001190829_chr19	4	+	ATCAACAAGAGCAAGTTCATCTGCCAAGTCatctgtaatcccagcactttgggaggccga	CT-GC	ZNF726->LDHA	->0
FUS_415191702_1725916828(+-)	2	1	1	+-	11	30406295	3	32806301	MPPED2	NM_001145399_chr11	7	-	CNOT10	NM_015442_chr3	17	+	CAAAGTGCTGGGAGGCATGAGCCACCGCGCctggtggagacactttcgggctttgtcata	CT-AC	CNOT10->MPPED2	2->
FUS_416238251_1682981080(+-)	7	4	5	+-	11	31452844	22	41175129	DNAJC24	NM_181706_chr11	5	+	SLC25A17	NM_006358_chr22	5	-	CCTCGACCTCCCAAAGTGCTAGGATTACAGgagtggttaatgtgttgctaacaactccac	GT-AG	DNAJC24->SLC25A17	->1
FUS_416623594_416904097(++)	2	2	0	++	11	31838187	11	32118690	DKFZp686K1684	NR_033971_chr11	1	+	RCN1	NM_002901_chr11	2	+	GAACCCGCGGAGGAGAGGATCCCGGCCCAGgaagattgttgatcgaatcgacaatgatgg	GT-AG	DKFZp686K1684->RCN1	->2
FUS_418505467_418516859(++)	17	6	20	++	11	33720060	11	33731452	C11orf91	NM_001166692_chr11	2	-	CD59	NM_203331_chr11,NM_203330_chr11,NM_203329_chr11,NM_000611_chr11,NM_001127225_chr11,NM_001127227_chr11,NM_001127226_chr11,NM_001127223_chr11	5,6,5,4,4,4,4,3	--------	TTTCGTCTTTTAGCGCCTTCAGGAATGTGTttcactcttagacttcttccttcaagtggg	CT-AC	CD59->C11orf91	->1
FUS_418505467_418517159(++)	26	13	21	++	11	33720060	11	33731752	C11orf91	NM_001166692_chr11	2	-	CD59	NM_203331_chr11,NM_203330_chr11,NM_203329_chr11,NM_000611_chr11,NM_001127225_chr11,NM_001127227_chr11,NM_001127226_chr11,NM_001127223_chr11	5,6,5,4,4,4,4,3	--------	TTTCGTCTTTTAGCGCCTTCAGGAATGTGTcattttcaagctgttcgttaaagttacaca	CT-AC	CD59->C11orf91	0->1
FUS_418529413_2477898397(-+)	15	3	12	-+	11	33744006	7	43580766	CD59	NM_203331_chr11,NM_203330_chr11,NM_203329_chr11,NM_000611_chr11,NM_001127225_chr11,NM_001127227_chr11,NM_001127226_chr11,NM_001127223_chr11	3,4,3,2,2,2,2,1	--------	HECW1	NM_015052_chr7	25	+	AGCCTCTCAAGTAGCTGGGATTACAGGTTCaggtttagcggtcgcatcctgggtctggct	TG-TC	CD59->HECW1	->0
FUS_421083197_496904929(++)	1	2	0	++	11	36297790	11	112119522	COMMD9	NM_001101653_chr11,NM_014186_chr11	4,5	--	C11orf34	NM_001145024_chr11	4	-	AGTCCAGATCGACCAGGCGTGGCAGAGAGAttagaagagaagtgtgctggtgagaaaagc	CT-CT	C11orf34->COMMD9	->1
FUS_421084046_496904930(++)	1	2	0	++	11	36298639	11	112119523	COMMD9	NM_001101653_chr11,NM_014186_chr11	3,4	--	C11orf34	NM_001145024_chr11	4	-	GTCCAGATCGACCAGGCGTGGCAGAGAGATtagaagagaagtgtgctggtgagaaaagca	CT-TT	C11orf34->COMMD9	->0
FUS_441942836_441960460(++)	15	4	13	++	11	57157429	11	57175053	PRG2	NM_002728_chr11	2	-	SLC43A3	NM_017611_chr11,NM_014096_chr11,NM_199329_chr11	14,14,14	---	AAGTAAGGGGAGTTTCATCTTGGCTTTATCctttgctttgagtctgtgtgatatcaatct	CT-GC	SLC43A3->PRG2	->
FUS_441942836_441962055(++)	14	4	12	++	11	57157429	11	57176648	PRG2	NM_002728_chr11	2	-	SLC43A3	NM_017611_chr11,NM_014096_chr11,NM_199329_chr11	13,13,13	---	AAGTAAGGGGAGTTTCATCTTGGCTTTATCgtaaaatgggtcattctgaagggagccttt	CT-AC	SLC43A3->PRG2	2->
FUS_441943476_441960461(++)	14	1	13	++	11	57158069	11	57175054	PRG2	NM_002728_chr11	1	-	SLC43A3	NM_017611_chr11,NM_014096_chr11,NM_199329_chr11	14,14,14	---	AGTAAGGGGAGTTTCATCTTGGCTTTATCCtttgctttgagtctgtgtgatatcaatctg	CA-CC	SLC43A3->PRG2	->
FUS_442295863_442344264(++)	8	2	6	++	11	57510456	11	57558857	C11orf31	NM_170746_chr11	4	+	TMX2-CTNND1,CTNND1,CTNND1,CTNND1,CTNND1,CTNND1,CTNND1	NR_037646_chr11,NM_001085459_chr11,NM_001085461_chr11,NM_001331_chr11,NM_001085458_chr11,NM_001085462_chr11,NM_001085460_chr11	4,3,3,3,3,2,3	+++++++	ATGAAGGTTCAGTTATGAGGCAACCCTCTAtgtgaagtgagggggtctctctccctcctt	GT-AG	C11orf31->TMX2-CTNND1,CTNND1,CTNND1,CTNND1,CTNND1,CTNND1,CTNND1	->
FUS_443170448_443175621(++)	5	1	4	++	11	58385041	11	58390214	ZFP91-CNTF,ZFP91,ZFP91	NR_024091_chr11,NM_053023_chr11,NM_001197051_chr11	11,11,11	+++	CNTF	NM_000614_chr11	1	+	TCAAAGTCATACTGCAGTGGGACGGAACGGttgagttaagggatggctttcacagagcat	GT-AG	ZFP91-CNTF,ZFP91,ZFP91->CNTF	2->
FUS_443706724_1737544874(++)	4	1	3	++	11	58921317	3	44434347	FAM111A	NM_022074_chr11,NM_001142520_chr11,NM_001142521_chr11,NM_001142519_chr11,NM_198847_chr11	4,5,5,5,4	+++++	C3orf23	NM_173826_chr3	6	+	CCTCAGTCTCCTGAGCAGCTGGGATTACAGatcctggttagataacaatgggaaaagtgc	GC-AG	FAM111A->C3orf23	->2
FUS_444893808_444949442(++)	13	5	11	++	11	60108401	11	60164035	MS4A6E	NM_139249_chr11	4	+	MS4A14	NM_001079692_chr11,NM_032597_chr11	1,1	++	TATAAAAAAGCAAACTTGAGTTTCCTAAATagttctgccatagaatcatggagtcaacat	GT-AG	MS4A6E->MS4A14	->
FUS_445990992_446034661(++)	9	5	7	++	11	61205585	11	61249254	SDHAF2	NM_017841_chr11	3	+	C11orf66	NM_145017_chr11,NM_001170753_chr11	2,2	++	ATGACTGGGATATTTACTACTGGGCCACAGgccccctggggccctgccccacagcatcat	GT-AG	SDHAF2->C11orf66	0->
FUS_445990992_570161998(++)	7	3	6	++	11	61205585	12	50370063	SDHAF2	NM_017841_chr11	3	+	AQP6	NM_001652_chr12	4	+	ATGACTGGGATATTTACTACTGGGCCACAGgctggagtgcagtggcatgatctcggctca	GT-AG	SDHAF2->AQP6	0->
FUS_445999110_446034661(++)	9	7	4	++	11	61213703	11	61249254	SDHAF2	NM_017841_chr11	4	+	C11orf66	NM_145017_chr11,NM_001170753_chr11	2,2	++	ATGGACATAACCCTCTCCTAGGACATACATgccccctggggccctgccccacagcatcat	GT-AG	SDHAF2->C11orf66	->
FUS_447202876_447216037(++)	17	3	16	++	11	62417469	11	62430630	INTS5	NM_030628_chr11	2	-	C11orf48	NM_024099_chr11	7	-	AAGCCTTGATTTCCTGGGACAGCTCCTGAGcacttccatggctgtcttctctttctgggc	CA-TC	C11orf48->INTS5	0->1
FUS_447202878_447216115(++)	20	9	16	++	11	62417471	11	62430708	INTS5	NM_030628_chr11	2	-	C11orf48	NM_024099_chr11	6	-	GCCTTGATTTCCTGGGACAGCTCCTGAGCActtccatggctgtcttctctttctgggcaa	CT-AC	C11orf48->INTS5	1->2
FUS_447260203_447268379(++)	2	1	1	++	11	62474796	11	62482972	BSCL2	NM_001130702_chr11,NM_001122955_chr11	2,1	--	HNRNPUL2	NM_001079559_chr11	13	-	ATTTTCCTGGATATGGAAAATGGAGGGTCCatcccgattgtattgtctgtaatagtctct	CT-AC	HNRNPUL2->BSCL2	2->
FUS_447291369_2562730987(++)	16	1	18	++	11	62505962	7	128413356	TTC9C	NM_173810_chr11	3	+	CALU	NM_001130674_chr7,NM_001199671_chr7,NM_001199672_chr7,NM_001199673_chr7,NM_001199674_chr7,NM_001219_chr7	7,8,8,6,5,7	++++++	AGAGAAATTAACCCTATACCTCTGACCCAGttccaggatacatgtgcaggatgtgcaggt	GT-AG	TTC9C->CALU	->
FUS_447719137_2729143299(++)	6	3	3	++	11	62933730	8	135686980	SLC22A25	NM_199352_chr11	7	-	ZFAT	NM_001029939_chr8	2	-	AGGCCCCAAAAAGGGATGGTACTTGCAAATaggagagctctggctggcatctggcaggtg	CT-AC	ZFAT->SLC22A25	->2
FUS_447733539_702635295(--)	1	1	0	--	11	62948132	13	48991456	SLC22A25	NM_199352_chr11	6	-	LPAR6	NM_001162497_chr13,NM_005767_chr13	3,4	--	TAAAAGAATCTGTTTCCTGTCCTTTGTGAGgtctgctggaatttgctggaggtccactcc	GT-AG	SLC22A25->LPAR6	1->
FUS_450123633_1275564192(+-)	2	9	0	+-	11	65338226	19	47242145	SSSCA1	NM_006396_chr11	2	+	STRN4	NM_013403_chr19,NM_001039877_chr19	2,2	--	ATGCTGGGCGAGACGTGTGCGGACTGCGGGgctcaggtggccttccttcagggagagagg	GT-AG	SSSCA1->STRN4	2->0
FUS_451169933_451230643(+-)	1	1	0	+-	11	66384526	11	66445236	RBM14,RBM14,RBM14,RBM14-RBM4,RBM14-RBM4	NM_006328_chr11,NM_001198836_chr11,NM_001198837_chr11,NM_001198845_chr11,NM_001198846_chr11	1,1,1,1,1	+++++	RBM4B	NM_031492_chr11	1	-	CGGACGCGTCATCGAGTGTGACGTGGTGAAaggctcttgtcaggatggtgaagctgttca	AG-GG	RBM14,RBM14,RBM14,RBM14-RBM4,RBM14-RBM4->RBM4B	1->
FUS_451169935_451192578(++)	1	1	0	++	11	66384528	11	66407171	RBM14,RBM14,RBM14,RBM14-RBM4,RBM14-RBM4	NM_006328_chr11,NM_001198836_chr11,NM_001198837_chr11,NM_001198845_chr11,NM_001198846_chr11	1,1,1,1,1	+++++	RBM4	NM_001198843_chr11,NM_002896_chr11,NM_001198844_chr11	2,2,2	+++	GACGCGTCATCGAGTGTGACGTGGTGAAAGgctcttgtcaggatggtgaagctgttcatc	GT-AG	RBM14,RBM14,RBM14,RBM14-RBM4,RBM14-RBM4->RBM4	0->
FUS_452728055_496530620(++)	9	1	8	++	11	67942648	11	111745213	SUV420H1	NM_016028_chr11,NM_017635_chr11	5,5	--	FDXACB1	NM_138378_chr11	5	-	GTTCTTCCTGCCTTCCTTTAATAGGCCTAAatctataatcccagcactttgggaggccga	AT-AC	FDXACB1->SUV420H1	->1
FUS_452728057_2306788725(+-)	15	4	12	+-	11	67942650	6	43586166	SUV420H1	NM_016028_chr11,NM_017635_chr11	5,5	--	POLH	NM_006502_chr6	11	+	TCTTCCTGCCTTCCTTTAATAGGCCTAAATctataatcccagcactttgggaggccgagg	CT-GC	POLH->SUV420H1	->2
FUS_458718821_1148335702(+-)	8	2	6	+-	11	73933414	17	79286167	PPME1	NM_016147_chr11	4	+	TMEM105	NM_178520_chr17	3	-	GGATTGTAGCTTTGGATCTGCGAAGTCATGtagagacggggtttcaccatgttggccagg	GT-AG	PPME1->TMEM105	0->
FUS_461599293_630420788(--)	2	70	0	--	11	76813886	12	110628853	OMP	NM_006189_chr11	1	+	IFT81	NM_001143779_chr12,NM_014055_chr12	13,13	++	CTGCGGCTGCTGCGGCCTGTCCTCCGCCATcatttcagacatatcatccaatgttcgtcc	GG-AC	IFT81->OMP	2->0
FUS_462368629_1834575373(++)	5	1	5	++	11	77583222	3	141464846	C11orf67	NM_024684_chr11	4	+	RNF7	NM_014245_chr3,NM_183237_chr3	3,3	++	TGGCCGAGGGATGAGTGAGGCCTTGAAGGTtcttgctctgccacccaggctggagtgcag	GC-AG	C11orf67->RNF7	1->
FUS_462513721_462566488(++)	13	1	14	++	11	77728314	11	77781081	KCTD14	NM_023930_chr11	2	-	NDUFC2	NM_004549_chr11	3	-	CCCCCGACGTTCAGCTCCACAACAGTAGACatcttcttcaggaaaatcctctggatgtaa	AT-TT	NDUFC2->KCTD14	2->2
FUS_462513723_462569451(++)	14	5	14	++	11	77728316	11	77784044	KCTD14	NM_023930_chr11	2	-	NDUFC2	NM_004549_chr11	2	-	CCCGACGTTCAGCTCCACAACAGTAGACATcttcttcaggaaaatcctctggatgtaatt	CT-AC	NDUFC2->KCTD14	0->0
FUS_462513723_462576032(++)	21	14	15	++	11	77728316	11	77790625	KCTD14	NM_023930_chr11	2	-	NDUFC2	NM_004549_chr11	1	-	CCCGACGTTCAGCTCCACAACAGTAGACATcagccgtcgcgatcggcctccgccggatta	CT-AC	NDUFC2->KCTD14	0->0
FUS_462519613_462569452(++)	13	1	14	++	11	77734206	11	77784045	KCTD14	NM_023930_chr11	1	-	NDUFC2	NM_004549_chr11	2	-	CCGACGTTCAGCTCCACAACAGTAGACATCttcttcaggaaaatcctctggatgtaattt	GT-CC	NDUFC2->KCTD14	2->2
FUS_467409835_1238083674(+-)	9	1	8	+-	11	82624428	19	9761627	C11orf82	NM_145018_chr11	2	+	ZNF562	NM_001130031_chr19,NM_001130032_chr19,NM_017656_chr19	6,6,4	---	CCTTAGCCTCCCAAGCAGCTGGTATTACAGatggagttttgctcttgttgcccaggctgg	GT-AG	C11orf82->ZNF562	->
FUS_471587844_653141061(+-)	4	1	3	+-	11	86802437	12	133349126	TMEM135	NM_001168724_chr11,NM_022918_chr11	4,4	++	GOLGA3	NM_005895_chr12	24	-	GGGCTGCTCACAATTTATATGGCCAACTTGacagagtctcgctttgttgcccaggctgga	GT-AG	TMEM135->GOLGA3	2->
FUS_471587844_1265703801(+-)	2	2	0	+-	11	86802437	19	37381754	TMEM135	NM_001168724_chr11,NM_022918_chr11	4,4	++	ZNF829	NM_001171979_chr19,NM_001037232_chr19	6,6	--	GGGCTGCTCACAATTTATATGGCCAACTTGacagagtctcgctctgttgcccaggctgga	GT-AG	TMEM135->ZNF829	2->
FUS_472841522_1911848153(+-)	10	3	12	+-	11	88056115	4	20715162	CTSC	NM_148170_chr11,NM_001114173_chr11	4,4	--	PACRGL	NM_001130727_chr4,NM_145048_chr4	4,7	++	ATGAGGCCAGCATCATCCTGATACCAAAACgcttgtaagcagatgcttcagatggtcgtt	CT-AC	PACRGL->CTSC	2->
FUS_472856308_1273711523(+-)	2	108	0	+-	11	88070901	19	45389476	CTSC	NM_148170_chr11,NM_001114173_chr11,NM_001814_chr11	1,1,1	---	PVRL2	NM_001042724_chr19	8	+	TTACCAGGAAGCCGAGCGCTGCGGGCTAGCctgctcagtgcatgaggcgccagcatcaaa	GG-AC	PVRL2->CTSC	2->
FUS_477411111_2689131048(++)	1	1	0	++	11	92625704	8	95674729	FAT3	NM_001008781_chr11	25	+	ESRP1	NM_001122827_chr8,NM_001122825_chr8,NM_017697_chr8,NM_001122826_chr8,NM_001034915_chr8	6,6,6,6,6	+++++	TCAAGCGATTCTCCTGCCTCAGCCTCCCAGatcacaggttttcagatccagagagagtga	GT-AG	FAT3->ESRP1	->1
FUS_495120323_704231521(++)	7	2	5	++	11	110334916	13	50587682	FDX1	NM_004109_chr11	4	+	TRIM13	NM_052811_chr13,NM_213590_chr13,NM_005798_chr13,NM_001007278_chr13	3,2,3,4	++++	TCAGCCTCCCAAAATGCTGGGATTACAGATggagtcttgctctgtcgcccaggctggagt	GT-AT	FDX1->TRIM13	->
FUS_496442651_1968835398(+-)	4	8	0	+-	11	111657244	4	77702407	ALG9	NM_001077691_chr11,NM_001077690_chr11,NM_024740_chr11,NM_001077692_chr11	15,15,15,15	----	SHROOM3	NM_020859_chr4	11	+	ACATAGAATGCCCGCAGCAGCTTTGAAGATttgggaggctgagatgggaggatggcttga	CT-AC	SHROOM3->ALG9	->02
FUS_496526499_496532235(++)	15	3	21	++	11	111741092	11	111746828	ALG9	NM_001077691_chr11,NM_001077690_chr11,NM_024740_chr11,NM_001077692_chr11	2,2,2,2	----	FDXACB1	NM_138378_chr11	5	-	CCAGACTTGTCCTGCTTTGTTCCCAGATAAcctgttcaactttcctacaagtgcttctgg	CC-CC	FDXACB1->ALG9	2->1
FUS_496526500_496532612(++)	22	29	21	++	11	111741093	11	111747205	ALG9	NM_001077691_chr11,NM_001077690_chr11,NM_024740_chr11,NM_001077692_chr11	2,2,2,2	----	FDXACB1	NM_138378_chr11	4	-	CAGACTTGTCCTGCTTTGTTCCCAGATAACctgttcaactttcctacaagtgcttctggt	CT-AC	FDXACB1->ALG9	1->0
FUS_496527620_496532612(++)	6	1	9	++	11	111742213	11	111747205	ALG9	NM_001077690_chr11,NM_024740_chr11	1,1	--	FDXACB1	NM_138378_chr11	4	-	TGCCGAGCCCCTCGACTAGCCATGGCAAGCctgttcaactttcctacaagtgcttctggt	CT-AC	FDXACB1->ALG9	1->
FUS_496745141_496825461(++)	26	1	44	++	11	111959734	11	112040054	SDHD	NM_003002_chr11	3	+	TEX12	NM_031275_chr11	2	+	TGGCTGCAGCCCTCACTCTTCATGGTCACTgtctccagtgccagatagtccacagctgtc	GG-GA	SDHD->TEX12	0->2
FUS_496745142_496826549(++)	35	19	44	++	11	111959735	11	112041142	SDHD	NM_003002_chr11	3	+	TEX12	NM_031275_chr11	3	+	GGCTGCAGCCCTCACTCTTCATGGTCACTGtctccagtgccagatagtccacagctgtcc	GC-AG	SDHD->TEX12	1->0
FUS_496745142_1278402160(+-)	2	1	1	+-	11	111959735	19	50080113	SDHD	NM_003002_chr11	3	+	NOSIP	NM_015953_chr19	2	-	GGCTGCAGCCCTCACTCTTCATGGTCACTGgctggagtgcaatggtgcgatcttggctca	GC-AG	SDHD->NOSIP	1->
FUS_496826804_496835408(++)	9	9	4	++	11	112041397	11	112050001	TEX12	NM_031275_chr11	4	+	BCO2	NM_031938_chr11,NM_001037290_chr11	2,2	++	AATGTTGTCTACCTATGCAAAGCTTTTAAGttttcaaaaggtacatgggaaatactcctc	GC-AG	TEX12->BCO2	1->1
FUS_496826804_496849604(++)	17	12	11	++	11	112041397	11	112064197	TEX12	NM_031275_chr11	4	+	BCO2	NM_031938_chr11,NM_001037290_chr11	3,3	++	AATGTTGTCTACCTATGCAAAGCTTTTAAGgtacaatcattggtttgatgggatggcgct	GC-AG	TEX12->BCO2	1->2
FUS_496827902_496835409(++)	5	2	4	++	11	112042495	11	112050002	TEX12	NM_031275_chr11	5	+	BCO2	NM_031938_chr11,NM_001037290_chr11	2,2	++	ATGTTGTCTACCTATGCAAAGCTTTTAAGTtttcaaaaggtacatgggaaatactcctca	GA-GT	TEX12->BCO2	2->2
FUS_507561769_1678728129(+-)	5	3	3	+-	11	122776362	22	36922178	C11orf63	NM_199124_chr11	4	+	EIF3D	NM_003753_chr22	2	-	TGGGAGGTCGAGGTGGGAGGATCACTTGAGattttggaagatggcaaagttcatgacacc	GC-AG	C11orf63->EIF3D	->
FUS_509758112_2372418305(+-)	2	8	0	+-	11	124972705	6	109215746	TMEM218	NM_001080546_chr11	1	-	ARMC2	NM_032131_chr6	6	+	TCTTATTCAAGAGGATGAAAACTCCCAGTCctgctttggtttgcagcctgctcaggtctg	CT-AC	ARMC2->TMEM218	0->
FUS_510615669_1725280095(-+)	1	1	0	-+	11	125830262	3	32169568	CDON	NM_016952_chr11	20	-	GPD1L	NM_015141_chr3	2	+	CCTCAGCCTCCTGAGTAGCTGGGACTACAGgggttcagctgttgcaaaaataattggtaa	GC-AG	CDON->GPD1L	->2
FUS_510949904_510959510(++)	22	16	16	++	11	126164497	11	126174103	TIRAP	NM_001039661_chr11	6	+	DCPS	NM_014026_chr11	1	+	CCATTTTTCTTCTGGCAGATGACTGTATTCcgttctccggcttcagactgcagaaggtgc	CT-AC	TIRAP->DCPS	->1
FUS_514549661_2680942146(--)	22	5	27	--	11	129764254	8	87485827	NFRKB	NM_001143835_chr11	2	-	FAM82B	NM_016033_chr8	10	-	CCTCAAATAAGGAAATTGACACCTGGCGTGagatggggttttgccatgttggctaggctg	GT-AG	NFRKB->FAM82B	->
FUS_522778383_522810630(++)	12	8	6	++	12	2986448	12	3018695	C12orf32	NR_027363_chr12,NR_027364_chr12,NR_027365_chr12	1,1,1	+++	TULP3	NM_003324_chr12,NM_001160408_chr12	2,2	++	AGGAGCTGCGGCCCCGTCCGGCCCGGGCTGtgtcttccatgaagaaatgatgaagatgcg	GT-AG	C12orf32->TULP3	->2
FUS_522778383_2833479412(++)	9	1	9	++	12	2986448	9	93659061	C12orf32	NR_027363_chr12,NR_027364_chr12,NR_027365_chr12	1,1,1	+++	SYK	NM_001174168_chr9,NM_001135052_chr9,NM_003177_chr9,NM_001174167_chr9	13,13,14,14	++++	AGGAGCTGCGGCCCCGTCCGGCCCGGGCTGcactttaggaggccgaggcgggtggatcac	GT-AG	C12orf32->SYK	->
FUS_524586426_524627633(++)	8	2	9	++	12	4794491	12	4835698	NDUFA9	NM_005002_chr12	10	+	GALNT8	NM_017417_chr12	2	+	CCCTGGATAACAAGGGATAAAGTGGAGCGGaagaaagtatgaaattagctctgaggcaac	GT-AG	NDUFA9->GALNT8	2->1
FUS_524588039_524627634(++)	8	1	9	++	12	4796104	12	4835699	NDUFA9	NM_005002_chr12	11	+	GALNT8	NM_017417_chr12	2	+	CCTGGATAACAAGGGATAAAGTGGAGCGGAagaaagtatgaaattagctctgaggcaaca	TG-GA	NDUFA9->GALNT8	0->2
FUS_524666646_524715879(++)	13	1	18	++	12	4874711	12	4923944	GALNT8	NM_017417_chr12	10	+	KCNA6	NM_002235_chr12	1	+	TAGACTGCATATATATTGGGATTTTAAACCggaaaaatgctggcaggtggtgcaagcaag	GG-CA	GALNT8->KCNA6	1->
FUS_524666647_524751839(++)	20	9	18	++	12	4874712	12	4959904	GALNT8	NM_017417_chr12	10	+	KCNA6	NM_002235_chr12	2	+	AGACTGCATATATATTGGGATTTTAAACCGgaaaaatgctggcaggtggtgcaagcaagg	GT-AG	GALNT8->KCNA6	2->
FUS_526522565_526540055(++)	4	1	3	++	12	6730630	12	6748120	LPAR5	NM_001142961_chr12,NM_020400_chr12	2,2	--	ACRBP	NM_032489_chr12	9	-	TTTGGTCACAGCTTCATCAGCAGCAGAGACcttccgattgcggtttctcatcagacactg	CT-AC	ACRBP->LPAR5	2->
FUS_529243391_551034017(--)	6	3	3	--	12	9451456	12	31242082	LOC642846	NR_024374_chr12	8	+	DDX11	NM_030653_chr12,NM_004399_chr12,NM_152438_chr12	7,7,7	+++	TCTCCTCCTCAGCTCCTTTCTTCTTCTCTGccgggagccaagggagaccagccgaacatc	CT-TG	DDX11->LOC642846	2->
FUS_530043459_2175167021(++)	16	2	20	++	12	10251524	5	92879726	CLEC1A	NM_016511_chr12	1	-	FLJ42709	NR_021490_chr5	6	-	CCTCGTGCTGCTGTACTTGGCCTGCATCTGgattcctgtaatcccagctactcaggaggc	GA-TA	FLJ42709->CLEC1A	->
FUS_530061937_1087911532(-+)	4	2	3	-+	12	10270002	17	18861997	CLEC7A	NM_197949_chr12,NM_197948_chr12,NM_022570_chr12,NM_197950_chr12,NM_197947_chr12	4,5,5,4,6	-----	SLC5A10	NM_152351_chr17,NM_001042450_chr17	2,2	++	TCAGCCTCCCAAGTAGCTGGGATTACAGTCctcttgtcgggccagtaggaacacggtgaa	AG-TC	CLEC7A->SLC5A10	->2
FUS_530259847_1536381620(--)	13	9	9	--	12	10467912	20	5731125	KLRD1	NM_002262_chr12,NM_001114396_chr12,NM_007334_chr12	6,7,5	+++	C20orf196	NM_152504_chr20	1	+	ACCAGCCTGGGCAACATAGCAAGACCTTGTctctcctccaaagcactccagaaaactgag	CT-AC	C20orf196->KLRD1	->
FUS_530259849_1536404004(--)	1	1	0	--	12	10467914	20	5753509	KLRD1	NM_002262_chr12,NM_001114396_chr12,NM_007334_chr12	6,7,5	+++	C20orf196	NM_152504_chr20	2	+	AGACCAGCCTGGGCAACATAGCAAGACCTTtcctctcctccaaagcactccagaaaactg	GT-AG	C20orf196->KLRD1	->
FUS_532735017_2951808048(++)	14	4	17	++	12	12943082	X	70757681	APOLD1	NM_030817_chr12,NM_001130415_chr12	2,2	++	OGT	NM_181673_chrX,NM_181672_chrX	3,3	++	TCAGCCTCCTGAGTAGCTGGGATTACAGATctgctcactttagcactctggcaattaaac	GT-AT	APOLD1->OGT	->1
FUS_532770869_1591498957(--)	2	7	0	--	12	12978934	20	60848462	DDX47	NM_016355_chr12,NM_201224_chr12	10,9	++	OSBPL2	NM_014835_chr20,NM_144498_chr20	6,6	++	AGCTGTTCGACCTACTCGATGGATGTAATCctgattaattcatacgtttctcccaagagt	CT-AC	OSBPL2->DDX47	1->0
FUS_534310696_2015371187(--)	36	17	59	--	12	14518761	4	124238196	ATF7IP	NM_018179_chr12	1	+	SPATA5	NM_145207_chr4	16	+	GAGGTTCTTCTAAACTGTCCATTCTGAATCgtgttagccaggatggtcttgatcttctga	TT-CT	SPATA5->ATF7IP	->
FUS_539235546_701113469(-+)	2	8	0	-+	12	19443611	13	47469630	PLEKHA5	NM_001143821_chr12	13	+	HTR2A	NM_000621_chr13	2	-	CTTTATTAGCAGCAGCGTAAGCTCCTCTGGcatacaggatggttaacatggacacgggca	CT-AC	HTR2A->PLEKHA5	0->0
FUS_539462982_1815558829(++)	20	6	23	++	12	19671047	3	122448302	AEBP2	NM_001114176_chr12,NM_153207_chr12	8,8	++	PARP14	NM_017554_chr3	17	+	CAGAACAATGCCGCAGAAGAGGTTGAAGAGatggagtttcactcttgttgcccaggctgg	GT-AG	AEBP2->PARP14	1->
FUS_540846336_541012188(++)	6	4	3	++	12	21054401	12	21220253	SLCO1B3	NM_019844_chr12	14	+	LST-3TM12	NM_001009562_chr12	11	+	TTGTAGGATATATAATTCCGTATTTTTTGGgattgttcaacctgaattgaaagcacttgc	GT-AG	SLCO1B3->LST-3TM12	1->2
FUS_541021437_541076105(++)	13	2	19	++	12	21229502	12	21284170	LST-3TM12	NM_001009562_chr12	12	+	SLCO1B1	NM_006446_chr12	1	+	CTTGTAGGATATATAATTCCACATATTTGGggtgattgtttcaaactgagcatcaacaac	GG-CA	LST-3TM12->SLCO1B1	0->
FUS_541021438_541086383(++)	18	9	19	++	12	21229503	12	21294448	LST-3TM12	NM_001009562_chr12	12	+	SLCO1B1	NM_006446_chr12	2	+	TTGTAGGATATATAATTCCACATATTTGGGgtgattgtttcaaactgagcatcaacaaca	GT-AG	LST-3TM12->SLCO1B1	1->
FUS_545494415_1978507174(++)	9	3	8	++	12	25702480	4	87374183	IFLTD1	NM_152590_chr12,NR_027296_chr12,NM_001145728_chr12,NM_001145729_chr12	2,2,3,3	----	MAPK10	NM_002753_chr4	1	-	AAAGAATATACTCCAAGTTTGTCTTCTCTTctggagctgagtcaatttagagagctgcgt	CT-AC	MAPK10->IFLTD1	->2
FUS_552569321_1489293477(+-)	13	3	10	+-	12	32777386	2	201842406	FGD4	NM_139241_chr12	12	+	FAM126B	NM_173822_chr2	12	-	TCTGCGCAAGACAAAGAAGAATGGATCAAGagacgaggttttgccatgttgcccaggctg	GT-AG	FGD4->FAM126B	2->
FUS_562419364_1705544778(-+)	6	1	5	-+	12	42627429	3	12434251	YAF2	NM_001190980_chr12	3	-	PPARG	NM_005037_chr3,NM_015869_chr3,NM_138711_chr3,NM_138712_chr3	4,4,5,5	++++	GCCTGTGGTCCCAGCTACTCAGGAGGCTGAgccatcaggtttgggcggatgccacaggcc	AG-AT	YAF2->PPARG	->0
FUS_565573879_1834225844(--)	1	1	0	--	12	45781944	3	141115317	ANO6	NM_001025356_chr12,NM_001142678_chr12,NM_001142680_chr12,NM_001142679_chr12	11,11,12,11	++++	ZBTB38	NM_001080412_chr3	6	+	GTCGCTTCCAAAACTCCAAAAACAAGGTAAcctcatggatgactttgagagattcaagac	CT-AC	ZBTB38->ANO6	->1
FUS_569107919_569124669(++)	30	12	32	++	12	49315984	12	49332734	FKBP11	NM_001143781_chr12,NM_016594_chr12	5,6	--	ARF3	NM_001659_chr12	5	-	GCTCCACGTCATACTGCACCACTGCATCCGttcttgtttttgagctgattggccagccag	CT-AC	ARF3->FKBP11	1->1
FUS_571165776_2315333432(++)	8	3	5	++	12	51373841	6	52130873	SLC11A2	NR_033422_chr12,NM_001174127_chr12,NM_001174126_chr12	18,17,17	---	MCM3	NM_002388_chr6	16	-	CAGCCTGGGCAACATGGTGAAATCCCGTCTctggattcactcaactccactttctgggat	CT-AC	MCM3->SLC11A2	1->
FUS_573229204_1032183287(-+)	7	2	5	-+	12	53437269	16	53488568	LOC283335	NR_033854_chr12	4	-	RBL2	NM_005611_chr16	8	+	CCTCAGCCTCCTGAGTAGCTGGGACTACAGtaaagccatcaataaggcctatgaggagta	GT-AG	LOC283335->RBL2	->2
FUS_577202207_577214489(++)	3	3	1	++	12	57410272	12	57422554	TAC3	NM_001178054_chr12,NM_013251_chr12,NR_033654_chr12	1,1,1	---	MYO1A	NM_005379_chr12	28	-	TCCCCTCACACACTGGTGCTGCCGGTGCTCctccaagcaatgactccccttttttttgta	CT-AC	MYO1A->TAC3	2->
FUS_577933488_2035257710(--)	1	1	0	--	12	58141553	4	144124719	TSPAN31	NM_005981_chr12	6	+	USP38	NM_032557_chr4	5	+	TTGCACTCCAGCCTGGGCAACAGAGCAAGActttattgcctccagaataggttcatagag	CT-AC	USP38->TSPAN31	2->
FUS_586314828_586323679(++)	18	9	18	++	12	66522893	12	66531744	LLPH	NM_032338_chr12	2	-	TMBIM4	NM_016056_chr12	7	-	TTACTCCGTAAGCTTTTAGCCATGTTTTACtttttattaactgcttccagaaaccgtaac	CT-AC	TMBIM4->LLPH	1->
FUS_588796743_2636332419(++)	14	7	12	++	12	69004808	8	42876100	RAP1B	NM_001010942_chr12,NM_015646_chr12	1,1	++	HOOK3	NM_032410_chr8	22	+	GCGCGGGGCGACGCTGGCTGCAGGGACCCGccaggcatggtggtgtgtgcctgtagtccc	GT-AG	RAP1B->HOOK3	->
FUS_588796758_1232614579(+-)	1	2	0	+-	12	69004823	19	4292532	RAP1B	NM_001010942_chr12,NM_015646_chr12	1,1	++	TMIGD2	NM_001169126_chr19,NM_144615_chr19	5,5	--	GGCTGCAGGGACCCGGTGACAGCGTGAGAGgccagacacggtggctcacgcctgtaatcc	GT-AG	RAP1B->TMIGD2	->
FUS_588796758_2636332419(++)	7	2	6	++	12	69004823	8	42876100	RAP1B	NM_001010942_chr12,NM_015646_chr12	1,1	++	HOOK3	NM_032410_chr8	22	+	GGCTGCAGGGACCCGGTGACAGCGTGAGAGccaggcatggtggtgtgtgcctgtagtccc	GT-AG	RAP1B->HOOK3	->
FUS_588796767_2636332419(++)	15	13	12	++	12	69004832	8	42876100	RAP1B	NM_015646_chr12	1	+	HOOK3	NM_032410_chr8	22	+	GACCCGGTGACAGCGTGAGAGGTTCGCAGAccaggcatggtggtgtgtgcctgtagtccc	GT-AG	RAP1B->HOOK3	->
FUS_589026997_1835425878(--)	11	1	12	--	12	69235062	3	142315351	MDM2	NM_002392_chr12	11	+	PLS1	NM_001145319_chr3	1	+	CAGCCTGGGCAACACAGGGAGACCCTGTCTctgccgccaccgctgtcctgccttcgagag	CT-AC	PLS1->MDM2	->
FUS_621572206_1879867057(++)	11	1	11	++	12	101780271	3	186756530	UTP20	NM_014503_chr12	62	+	ST6GAL1	NM_173216_chr3,NM_173217_chr3,NM_003032_chr3	3,3,2	+++	CCTCGGCCTCCCAAAGTGCTGGGATTACAGatgagttttgatcatcctgagaaaaatggg	GT-AG	UTP20->ST6GAL1	->
FUS_624162631_2082079203(-+)	1	1	0	-+	12	104370696	4	190946212	TDG	NM_003211_chr12	2	+	LOC100288255,FRG2	NM_001199232_chr4,NM_001005217_chr4	4,4	--	TAAAAAGCTTGAGCTTGCTGAAGGGAATAGctgtagtcccagctgcttgggaggctgagg	CT-GC	LOC100288255,FRG2->TDG	->2
FUS_624162635_1521176059(--)	3	3	0	--	12	104370700	2	233724988	TDG	NM_003211_chr12	2	+	GIGYF2	NM_001103148_chr2,NM_001103146_chr2,NM_015575_chr2,NM_001103147_chr2	28,29,31,31	++++	CGTATAAAAAGCTTGAGCTTGCTGAAGGGAatagctgtagtcccagctacttgggaggct	AT-AC	GIGYF2->TDG	->0
FUS_637441680_1506597975(--)	28	8	43	--	12	117649745	2	219146904	NOS1	NM_000620_chr12	29	-	TMBIM1	NM_022152_chr2	2	-	CCTCGGCCTCCTGAGTAACTGGGACTACAGgtcccagcagctggggttccccctcagccc	GC-AG	NOS1->TMBIM1	->
FUS_641504323_2238800829(++)	11	3	12	++	12	121712388	5	156513534	CAMKK2	NM_172226_chr12,NM_172214_chr12,NM_006549_chr12,NM_153499_chr12,NM_172216_chr12,NM_172215_chr12,NM_153500_chr12	2,2,2,2,2,2,2	-------	HAVCR2	NM_032782_chr5	7	-	TGGGGCACTCCCATCCGGCAGCGGAGCCACctgtaatcccagccactcaggaggctgagg	CT-GC	HAVCR2->CAMKK2	->
FUS_641504323_2927457420(+-)	18	2	22	+-	12	121712388	X	46407053	CAMKK2	NM_172226_chr12,NM_172214_chr12,NM_006549_chr12,NM_153499_chr12,NM_172216_chr12,NM_172215_chr12,NM_153500_chr12	2,2,2,2,2,2,2	-------	LOC401588	NR_015378_chrX	2	+	TGGGGCACTCCCATCCGGCAGCGGAGCCACctgtaatcccagccactcgggaggctgagg	CT-GC	LOC401588->CAMKK2	->
FUS_641581872_1036094258(-+)	4	1	3	-+	12	121789937	16	57399539	ANAPC5	NM_016237_chr12	1	-	CCL22	NM_002990_chr16	3	+	CTCAACCAGCTGCTCCTGCCCCTGCTGCAGagacggggttttgccatgttacccaggctg	GT-AG	ANAPC5->CCL22	2->
FUS_642494879_642508808(++)	6	2	5	++	12	122702944	12	122716873	DIABLO	NM_019887_chr12,NR_024600_chr12	4,4	--	VPS33A	NM_022916_chr12	13	-	TTCACTACTAAGGGAATGAGGCTCTGATTTctccatcttccaactgggagagaaatcgca	CT-AC	VPS33A->DIABLO	0->0
FUS_644280022_2836030330(+-)	2	2	0	+-	12	124488087	9	96209979	ZNF664	NM_152437_chr12	3	+	FAM120AOS	NM_198841_chr9	3	-	CCTCAGCCTCTGGAGTAGCTGGGATTACAGatttccagaagctgttctgtcaataacaaa	GT-AG	ZNF664->FAM120AOS	->0
FUS_644281416_1485090911(+-)	12	1	15	+-	12	124489481	2	197639840	ZNF664	NM_152437_chr12	4	+	GTF3C3	NM_012086_chr2	13	-	AGCTCAGGGCTCCCACTGATTCTACATTATgcaatatttgctgtgctcacaagcgtcttg	GG-AA	ZNF664->GTF3C3	->0
FUS_644281417_1485088948(+-)	22	16	15	+-	12	124489482	2	197637877	ZNF664	NM_152437_chr12	4	+	GTF3C3	NM_012086_chr2	14	-	GCTCAGGGCTCCCACTGATTCTACATTATGcaatatttgctgtgctcacaagcgtcttga	GT-AG	ZNF664->GTF3C3	->1
FUS_644281417_1529487913(+-)	10	7	5	+-	12	124489482	2	242036842	ZNF664	NM_152437_chr12	4	+	MTERFD2	NR_028049_chr2,NM_182501_chr2,NR_028050_chr2	3,3,2	---	GCTCAGGGCTCCCACTGATTCTACATTATGggaaattaaagagggtgctttactgttgcc	GT-AG	ZNF664->MTERFD2	->1
FUS_652215755_2002066650(--)	4	3	1	--	12	132423820	4	110933659	PUS1	NM_025215_chr12,NM_001002019_chr12,NM_001002020_chr12	4,4,4	+++	EGF	NM_001178130_chr4,NM_001963_chr4,NM_001178131_chr4	23,24,23	+++	GTTAAACCCGCCCGTGACCCGCTTCAGTCCtactcgggaggctgaggcaggaggattgct	CA-GT	EGF->PUS1	->0
FUS_653073312_653079586(++)	15	1	28	++	12	133281377	12	133287651	PXMP2	NM_018663_chr12	5	+	PGAM5	NM_001170544_chr12,NM_138575_chr12,NM_001170543_chr12	1,1,1	+++	AATCCAGTCAGGATGTCACTGACTCTAAATcaggcgagaaccactgtctctgatcaacgt	CA-GA	PXMP2->PGAM5	->2
FUS_653073315_653083379(++)	29	18	28	++	12	133281380	12	133291444	PXMP2	NM_018663_chr12	5	+	PGAM5	NM_001170544_chr12,NM_138575_chr12,NM_001170543_chr12	2,2,2	+++	CCAGTCAGGATGTCACTGACTCTAAATCAGgcgagaaccactgtctctgatcaacgtgcg	GT-AG	PXMP2->PGAM5	->2
FUS_653083379_1048035462(--)	3	1	2	--	12	133291444	16	69340743	PGAM5	NM_001170544_chr12,NM_138575_chr12,NM_001170543_chr12	2,2,2	+++	SNTB2	NM_006750_chr16	7	+	CGCACGTTGATCAGAGACAGTGGTTCTCGCctcagcctcccgagtagctgggaccacagg	CT-AC	SNTB2->PGAM5	->2
FUS_653090401_989562704(+-)	6	2	6	+-	12	133298466	16	10867985	PGAM5	NM_001170544_chr12,NM_001170543_chr12	6,6	++	FAM18A	NM_001079512_chr16	4	-	CCTTGGCCTCCCAAAGTGCTGGGATTAAAGaatgtaaccggaagactcctggtgggcctt	GT-AG	PGAM5->FAM18A	->0
FUS_653246175_1008373602(+-)	5	1	4	+-	12	133454240	16	29678883	CHFR	NM_018223_chr12,NM_001161345_chr12,NM_001161344_chr12,NM_001161347_chr12,NM_001161346_chr12	3,3,3,3,3	-----	SPN	NM_003123_chr16,NM_001030288_chr16	2,2	++	GTTTATTGCTGGGGAAGGAAAGGTCGCAACctcatgatctgcccaccttggcctcccaaa	CT-AC	SPN->CHFR	->1
FUS_653556393_1036093252(--)	10	1	11	--	12	133764458	16	57398533	ZNF268	NM_001165882_chr12,NM_001165883_chr12,NM_003415_chr12,NM_001165881_chr12,NM_152943_chr12,NM_001165885_chr12	3,3,3,3,3,3	++++++	CCL22	NM_002990_chr16	3	+	TGAACTGTTTCGTTCTTGGAGAGGTGGGACctgtaatcccagctactcaggaggctgagg	CT-AC	CCL22->ZNF268	->0
FUS_673888342_1277574914(+-)	10	2	11	+-	13	20244503	19	49252867	MPHOSPH8	NM_017520_chr13	12	+	FUT1	NM_000148_chr19	4	-	AATGATAAATTTCAGCTTCCTGTTTTTCTGacagggtctcgctctgttgcccaggctgga	GT-AG	MPHOSPH8->FUT1	2->
FUS_675592494_2558804680(++)	2	1	1	++	13	21948655	7	124487049	ZDHHC20	NM_153251_chr13	12	-	POT1	NR_003104_chr7,NR_003103_chr7,NR_003102_chr7,NM_015450_chr7,NM_001042594_chr7	12,12,13,12,11	-----	GGCCTCCCAAAGTGCTGGGATTACAGGCATgagcctgtaatcccagctacttgggaggct	GA-CA	POT1->ZDHHC20	1->
FUS_686614874_2772866069(-+)	7	2	5	-+	13	32971035	9	33045718	BRCA2	NM_000059_chr13	26	+	SMU1	NM_018225_chr9	12	-	TTCTGCTTCATTGCAAAGTATGTCAATATTctgtagtcccagctacttgggaggctaagg	CT-GC	SMU1->BRCA2	->0
FUS_686614879_2951150322(-+)	1	1	0	-+	13	32971040	X	70099955	BRCA2	NM_000059_chr13	26	+	TEX11	NM_001003811_chrX,NM_031276_chrX	4,3	--	TTGTTTTCTGCTTCATTGCAAAGTATGTCAaacttctgtagtcccagctacttgggaggc	AT-AC	TEX11->BRCA2	2->2
FUS_704231519_2918750233(-+)	3	2	1	-+	13	50587680	X	37699866	TRIM13	NM_052811_chr13,NM_213590_chr13,NM_005798_chr13,NM_001007278_chr13	3,2,3,4	++++	DYNLT3	NM_006520_chrX	5	-	TCCAGCCTGGGCGACAGAGCAAGACTCCATagttcatggtccggttctcccatcttacgg	CT-AC	DYNLT3->TRIM13	0->
FUS_706877223_2522224641(+-)	1	2	0	+-	13	53233384	7	87907010	SUGT1	NM_001130912_chr13,NM_006704_chr13	5,5	++	STEAP4	NM_024636_chr7	5	-	AAACTTTTACAGAAGGACAAAAATTAGATAtagagacagggtttcaccacattggtcagg	GT-AG	SUGT1->STEAP4	0->
FUS_752720740_1002349061(++)	18	3	15	++	13	99076901	16	23654342	FARP1	NM_005766_chr13	17	+	DCTN5	NM_001199011_chr16,NM_032486_chr16,NR_037573_chr16	2,2,2	+++	GATGTCATGCTGAAGAACATTCAGGGCATGaaggctggagtgcaatggcgcgatctcggc	AA-GC	FARP1->DCTN5	2->0
FUS_793478001_793493313(++)	5	1	4	++	14	24664242	14	24679554	TM9SF1	NM_006405_chr14,NM_001014842_chr14	2,2	--	CHMP4A	NM_014169_chr14	5	-	CTACGACTGTCATCCTTAAGGCAGTGGAACctggccctgccggcagatgagtagaaggta	CT-AC	CHMP4A->TM9SF1	0->
FUS_826761072_1284183539(--)	22	1	34	--	14	57947313	19	55861492	C14orf105	NM_018168_chr14	5	-	COX6B2	NM_144613_chr19	5	-	TGCCTGATGAAATCTTGAACAGAGGTCCCGacagagtttcgctcctgtcacccaggctgg	GT-AG	C14orf105->COX6B2	0->
FUS_826847041_1763097727(+-)	1	1	0	+-	14	58033282	3	69987200	SLC35F4	NM_001080455_chr14	7	-	MITF	NM_198159_chr3,NM_006722_chr3,NM_000248_chr3,NM_198158_chr3,NM_198177_chr3,NM_001184967_chr3,NM_001184968_chr3	3,3,2,2,3,3,2	+++++++	CCACCCCAACATTCACCAGGATGTTGAAGGctctttttcacagttggagttaagcgtaag	CT-AC	MITF->SLC35F4	2->1
FUS_834204603_834284726(++)	8	5	3	++	14	65390844	14	65470967	CHURC1	NM_145165_chr14	2	+	FNTB	NM_002028_chr14	2	+	AAGATGGAGAAGAAATAGTTACCTATGATCgcaaaagtagaagaaaagatccaagaggtc	GT-AG	CHURC1->FNTB	0->0
FUS_834206554_834267572(++)	2	1	1	++	14	65392795	14	65453813	CHURC1	NM_145165_chr14	3	+	FNTB	NM_002028_chr14	1	+	GAGTATACATTCAGTATCATGGATGAATTTcaggcaaaagtagaagaaaagatccaagag	CA-AA	CHURC1->FNTB	2->0
FUS_834206557_834284726(++)	2	1	1	++	14	65392798	14	65470967	CHURC1	NM_145165_chr14	3	+	FNTB	NM_002028_chr14	2	+	TATACATTCAGTATCATGGATGAATTTCAGgcaaaagtagaagaaaagatccaagaggtc	GT-AG	CHURC1->FNTB	2->0
FUS_842997135_2262955787(++)	9	1	8	++	14	74183376	5	180668492	C14orf43	NM_001043318_chr14,NM_194278_chr14	12,12	--	GNB2L1	NM_006098_chr5	3	-	CTGCACTCCAGCCTGGGCGACAGAATGAGActggacagtgtatttgcacacacccagggt	CT-AC	GNB2L1->C14orf43	2->
FUS_842997141_2490419285(++)	13	5	10	++	14	74183382	7	56101654	C14orf43	NM_001043318_chr14,NM_194278_chr14	12,12	--	PSPH	NM_004577_chr7	2	-	TCCAGCCTGGGCGACAGAATGAGACTCTGTcctgtgtcctgggcctccggggctcctgcg	CT-AC	PSPH->C14orf43	->
FUS_844016386_2538996277(--)	10	2	10	--	14	75202627	7	104678646	FCF1	NM_015962_chr14	8	+	MLL5	NM_182931_chr7	2	+	CTCCAGCCTGGTGACAGAGCGAGACTCCGTcatgagatgtctggtaaatctgaggtccaa	CT-AC	MLL5->FCF1	->
FUS_860437788_2692197480(++)	1	2	0	++	14	91624029	8	98741161	C14orf159	NM_024952_chr14,NM_001102368_chr14,NM_001102367_chr14,NM_001102366_chr14,NM_001102369_chr14	2,2,3,4,4	+++++	MTDH	NM_178812_chr8	12	+	GTTTAACCCTGCCTTCAAAGGGACGACTCTatagggtctcactctgttgcccaggctgga	GT-AG	C14orf159->MTDH	->
FUS_861217300_2695670287(++)	1	1	0	++	14	92403541	8	102213968	FBLN5	NM_006329_chr14	4	-	ZNF706	NM_001042510_chr8,NM_016096_chr8,NM_001042511_chr8	3,2,2	---	CAGGCCTCGGGGATGGTTCGGCATTCATCAatatctgtaattccagctacttgggaggct	AT-CC	ZNF706->FBLN5	1->2
FUS_861444234_1574687595(++)	2	1	2	++	14	92630475	20	44037100	CPSF2	NM_017437_chr14	16	+	DBNDD2,SYS1-DBNDD2,DBNDD2,DBNDD2,DBNDD2,DBNDD2,DBNDD2,DBNDD2,DBNDD2,DBNDD2	NM_018478_chr20,NR_003189_chr20,NM_001048221_chr20,NM_001197139_chr20,NM_001197140_chr20,NM_001048222_chr20,NM_001048223_chr20,NM_001048224_chr20,NM_001048226_chr20,NM_001048225_chr20	2,4,2,2,2,2,2,2,1,1	++++++++++	GATGTGTTTGCTTCCCCTTCCACCATGATTgagctgacatggacccaaatcctcgggccg	GT-AG	CPSF2->DBNDD2,SYS1-DBNDD2,DBNDD2,DBNDD2,DBNDD2,DBNDD2,DBNDD2,DBNDD2,DBNDD2,DBNDD2	->1
FUS_872867460_872934660(++)	3	1	2	++	14	104053701	14	104120901	C14orf153	NM_032374_chr14	4	+	KLC1	NM_182923_chr14,NM_001130107_chr14,NM_005552_chr14	2,2,2	+++	AAATTTTCAGAAGCACATGTATTATAACAGaatgtatgacaacatgtccacaatggtgta	GT-AG	C14orf153->KLC1	1->
FUS_909226855_1731099076(-+)	16	1	22	-+	15	33063528	3	37988549	FMN1	NM_001103184_chr15	17	-	CTDSPL	NM_005808_chr3,NM_001008392_chr3	2,2	++	CTATAATCCCAGCACTTTGGGAGGCCAAGCctcccagtgcaacgtcagcttaaagaagca	GG-GC	FMN1->CTDSPL	->2
FUS_914810504_1445632253(-+)	22	4	28	-+	15	38647177	2	158181182	SPRED1	NM_152594_chr15	7	+	ERMN	NM_001009959_chr2,NM_020711_chr2	3,2	--	CCAGCCTGGGCAACAAGAGTGAAACTCCGTcttctctgaatgtcatttcatcagcactag	CT-AC	ERMN->SPRED1	0->
FUS_919022735_1238792025(+-)	9	1	8	+-	15	42859408	19	10469978	HAUS2	NM_018097_chr15,NM_001130447_chr15	6,5	++	TYK2	NM_003331_chr19	15	-	CTTAAACCCAGGAGTTCAAGACCAGCCTGGatatcatggtgacagagtacgtggagcacg	GT-AG	HAUS2->TYK2	->1
FUS_919816157_2688259866(+-)	1	1	0	+-	15	43652830	8	94803547	ZSCAN29	NM_152455_chr15	5	-	TMEM67	NM_001142301_chr8,NR_024522_chr8,NM_153704_chr8	16,15,15	+++	CCAGCCTGGGCAACAAGAGCAAAACTCCGTatctgtctggacatgtgcttctccatgatc	CT-AC	TMEM67->ZSCAN29	2->
FUS_920248608_920256020(++)	19	7	18	++	15	44085281	15	44092693	SERF2	NM_001018108_chr15	2	+	C15orf63	NM_016400_chr15	1	+	CGGGCTTTCTGCTGCCGCCCGCAAGCAGAGcttctagaactggagcagaaagaaggtgtg	GT-AG	SERF2->C15orf63	1->
FUS_929004005_2436596684(++)	4	2	2	++	15	52840678	7	2279053	ARPP19	NM_006628_chr15	3	-	FTSJ2	NM_013393_chr7	2	-	ACTCCAGCCTGGGCAAGAGTGAGACTCCATctgtgcctgcggcgttgaccttctgcaccg	CT-AC	FTSJ2->ARPP19	0->
FUS_931844958_931894997(++)	7	2	5	++	15	55681631	15	55731670	CCPG1	NM_004748_chr15,NM_020739_chr15	2,2	--	DYX1C1	NM_130810_chr15,NM_001033560_chr15,NM_001033559_chr15	7,7,7	---	GTCACTGGAATTTTCAGACATCTTTCAGGTtttcctttatccttcaaccattctgggttc	CT-AC	DYX1C1->CCPG1	1->
FUS_940756249_940821500(++)	4	1	3	++	15	64592922	15	64658173	CSNK1G1	NM_022048_chr15	2	-	KIAA0101	NM_001029989_chr15,NM_014736_chr15	3,4	--	GGTCTCAATCTTAGGTGAACATCTTGTAACattctagaataccagggtaaacaaggagac	CT-AC	KIAA0101->CSNK1G1	->
FUS_941317101_941377447(++)	8	4	4	++	15	65153774	15	65214120	PLEKHO2	NM_025201_chr15,NM_001195059_chr15	5,4	++	ANKDD1A	NM_182703_chr15	4	+	CGGCCACCAACGAGAGTCCACCTGAAGGAGtttgggatgaatgcgcttctcctgtctgcc	GT-AG	PLEKHO2->ANKDD1A	2->0
FUS_945862824_2533290035(--)	10	2	8	--	15	69699497	7	98972404	PAQR5	NM_017705_chr15,NM_001104554_chr15	9,9	++	ARPC1B	NM_005720_chr7	1	+	TCCAGCCTGGGCAACAGAACAAGACCCTGTctcccgcgccccggccgcggactctgggca	CT-AC	ARPC1B->PAQR5	->
FUS_945901675_1002265716(--)	2	6	0	--	15	69738348	16	23570997	KIF23	NM_004856_chr15,NM_138555_chr15	19,20	++	UBFD1	NM_019116_chr16	3	+	TCCACCACCCCTTGTTTTATAAATATCACCtttctgcctgcagagaggctccttcttgtt	CT-AC	UBFD1->KIF23	2->0
FUS_953317513_1325325036(--)	9	1	8	--	15	77154186	2	37873965	SCAPER	NM_001145923_chr15	1	-	CDC42EP3	NM_006449_chr2	2	-	TTCCTGAGGCCTCCCCAGCCATGCTGAACTgtttgtcctggttgtggtcaagactggatg	GT-AG	SCAPER->CDC42EP3	->
FUS_953317515_1325349641(--)	1	1	0	--	15	77154188	2	37898570	SCAPER	NM_001145923_chr15	1	-	CDC42EP3	NM_006449_chr2	1	-	GTTTCCTGAGGCCTCCCCAGCCATGCTGAAcggtttgtcctggttgtggtcaagactgga	CT-GC	SCAPER->CDC42EP3	->
FUS_954955565_1489456231(--)	12	2	11	--	15	78792238	2	202005160	IREB2	NM_004136_chr15	22	+	CFLAR	NM_003879_chr2,NM_001127184_chr2,NM_001127183_chr2	5,5,5	+++	AGCCAAGATCGCGCCATTGCACTCCAGCCCtgaagttatttgaaggatccttgagactct	AG-CC	CFLAR->IREB2	0->
FUS_966541455_2258926491(+-)	20	6	22	+-	15	90378128	5	176639196	AP3S2,AP3S2,AP3S2,C15orf38-AP3S2	NR_023361_chr15,NM_005829_chr15,NR_037582_chr15,NM_001199058_chr15	7,6,6,10	----	NSD1	NM_022455_chr5,NM_172349_chr5	5,6	++	TCCAGCCTGGGTGACAGAGCAAGACTCCACctggttcagggagctcagcctgtggtgtca	CT-AC	NSD1->AP3S2,AP3S2,AP3S2,C15orf38-AP3S2	0->
FUS_976675779_1518237667(++)	18	1	24	++	15	100512452	2	230786596	ADAMTS17	NM_139057_chr15	22	-	TRIP12	NM_004238_chr2	1	-	TCCAGCCTGGGCAACAGAGGGAGACTCTGTctagttaggccccaaagtctccggtccgga	CT-AC	TRIP12->ADAMTS17	->
FUS_979312282_979318785(++)	24	8	22	++	16	617563	16	624066	NHLRC4	NM_176677_chr16	2	+	PIGQ	NM_004204_chr16,NM_148920_chr16	2,2	++	GATTCGGACTGACTGGACTCTGGCCTCCAGcctcccggcatggtgctcaaggccttcttc	GT-AG	NHLRC4->PIGQ	->
FUS_979313708_979318785(++)	13	2	12	++	16	618989	16	624066	NHLRC4	NM_176677_chr16	2	+	PIGQ	NM_004204_chr16,NM_148920_chr16	2,2	++	CCTCCAGTAGCTTCTCTGGGCCTGGCAGAGcctcccggcatggtgctcaaggccttcttc	GT-AG	NHLRC4->PIGQ	->
FUS_982254639_1962665137(-+)	19	1	23	-+	16	3559920	4	71532146	CLUAP1	NM_024793_chr16	1	+	IGJ	NM_144646_chr4	1	-	GAGGCTGAGGCAGAAGAATCTCTTGAACCTttcacatgaacagccttaataaaaaccgcc	GG-CT	IGJ->CLUAP1	1->
FUS_983434785_2533994909(+-)	6	4	3	+-	16	4740066	7	99677278	MGRN1	NM_001142290_chr16,NM_001142291_chr16,NM_015246_chr16,NM_001142289_chr16	17,16,17,16	++++	ZNF3	NM_032924_chr7,NM_017715_chr7	2,2	--	TTACAGGCGTGAGCCTCCGCGCCCGGCCCCattggcatcaacaaaagtcagaattcccgg	CT-GC	MGRN1->ZNF3	->
FUS_983789536_1679850393(+-)	8	3	5	+-	16	5094817	22	38044442	C16orf89	NM_152459_chr16	8	-	SH3BP1	NM_018957_chr22	14	+	TGAGCCGAGATTGCGCCACTGTACTCCAGCccttctttctcaggtggccacagcaagttg	CT-AC	SH3BP1->C16orf89	1->0
FUS_990756146_1794612151(--)	6	3	3	--	16	12061427	3	101501624	TNFRSF17	NM_001192_chr16	3	+	FAM55C	NM_145037_chr3,NM_001134456_chr3	3,3	++	CAATGTTAGCCATGCCCAGGAGACCTGATCctatagtcccagttactcaggaggctgagg	CT-AC	FAM55C->TNFRSF17	->1
FUS_998281163_1205560105(+-)	12	10	4	+-	16	19586444	18	55315306	C16orf62	NM_020314_chr16	5	+	ATP8B1	NM_005603_chr18	28	-	CTATTAATCTGTTTATGGGATCTGAAAAAGatggaggttacagtgagccgagattgcgcc	GT-AG	C16orf62->ATP8B1	0->
FUS_1000701348_2562640940(+-)	8	1	8	+-	16	22006629	7	128323309	PDZD9	NR_033694_chr16	3	-	FAM71F2	NM_001128926_chr7,NM_001012454_chr7	5,5	++	AGGCCTCCCCAGCCATGCTTCCTGTACAGCctctcccaaggtcacttggctcacagtgga	CT-AC	FAM71F2->PDZD9	->
FUS_1000701348_2562640994(+-)	9	1	10	+-	16	22006629	7	128323363	PDZD9	NR_033694_chr16	3	-	FAM71F2	NM_001012454_chr7	5	+	AGGCCTCCCCAGCCATGCTTCCTGTACAGCttggaagtttattggtggaagtagagaagc	CT-AC	FAM71F2->PDZD9	->
FUS_1006157567_1890783084(+-)	14	3	13	+-	16	27462848	3	197672557	IL21R	NM_181078_chr16,NM_181079_chr16,NM_021798_chr16	9,10,9	+++	IQCG	NM_001134435_chr3,NM_032263_chr3	2,3	--	CAGGAGTTCGAGACCAGCCTGGGCAACATAgtaactgcacttttgtgagattataaatat	GC-AG	IL21R->IQCG	->
FUS_1008369356_1008385160(++)	3	1	2	++	16	29674637	16	29690441	SPN	NM_003123_chr16	1	+	QPRT	NM_014298_chr16	1	+	CCCAGTGCTGCGTCCTTATCAGCCGAGCCGtcccacccccagcctggggcctctgggagc	GT-AG	SPN->QPRT	->
FUS_1009464391_1876817695(+-)	5	4	1	+-	16	30769672	3	183707168	PHKG2	NM_000294_chr16	10	+	ABCC5	NM_005688_chr3,NM_001023587_chr3	3,3	--	CAGCCTCCCAAAGTGCTGGGATTACAGTTGgaatgccaagatgccttggaaacagcagcc	TG-TG	PHKG2->ABCC5	->0
FUS_1009793866_1009799352(++)	8	2	6	++	16	31099147	16	31104633	PRSS53	NM_001039503_chr16	2	-	VKORC1	NM_024006_chr16	2	-	GTCCACAGGCACGCTGAGCGGCTTGAAGACctaacaatagctgtagtgtgtagaagatgc	CT-AC	VKORC1->PRSS53	0->1
FUS_1025434594_2737556322(+-)	15	4	14	+-	16	46739875	8	144100003	MYLK3	NM_182493_chr16	13	-	LY6E	NM_002346_chr8,NM_001127213_chr8	1,1	++	GCACTGCAGCCTGGGCAACAGAGTGAGACCcgccgggcggacgcaggtaccagcagcctg	CT-AC	LY6E->MYLK3	->
FUS_1037010905_2574387113(+-)	4	5	0	+-	16	58316186	7	140069482	CCDC113	NM_001142302_chr16,NM_014157_chr16	8,9	++	SLC37A3	NM_032295_chr7,NM_207113_chr7	4,4	--	CCTCGGCCTCCCCAAGTGTTGGGATTACAGatctggagcagcaaccatttgttccccagt	GC-AG	CCDC113->SLC37A3	->0
FUS_1045281415_1045305726(++)	13	3	11	++	16	66586696	16	66611007	CKLF	NM_181641_chr16,NM_016326_chr16,NM_016951_chr16,NM_181640_chr16,NM_001040138_chr16	1,1,1,1,1	+++++	CMTM1	NM_052999_chr16,NM_181271_chr16,NM_181283_chr16,NM_181272_chr16,NM_181270_chr16,NM_181268_chr16,NM_181269_chr16	3,2,2,2,3,3,3	+++++++	GTGAAAGGCCACGTGAAGATGCTGCGGCTGgatcttaccaacagtatcattacagctgtg	GT-AG	CKLF->CMTM1	2->0
FUS_1045291745_1045305728(++)	11	1	11	++	16	66597026	16	66611009	CKLF	NM_016951_chr16,NM_181640_chr16,NM_001040138_chr16	3,2,3	+++	CMTM1	NM_052999_chr16,NM_181271_chr16,NM_181283_chr16,NM_181272_chr16,NM_181270_chr16,NM_181268_chr16,NM_181269_chr16	3,2,2,2,3,3,3	+++++++	GAAAGGCCACGTGAAGATGCTGCGGCTGGAtcttaccaacagtatcattacagctgtgtt	TA-GA	CKLF->CMTM1	1->2
FUS_1045291839_1045298558(++)	12	3	10	++	16	66597120	16	66603839	CKLF	NM_016951_chr16,NM_181640_chr16,NM_001040138_chr16	3,2,3	+++	CMTM1	NM_052999_chr16,NM_181270_chr16,NM_181268_chr16,NM_181269_chr16	2,2,2,2	++++	GAAACCACAACATTGACAGTTGGTGGAGGGagtcttatcttaggagcattagcttgtttc	GT-AG	CKLF->CMTM1	2->0
FUS_1045291839_1045305726(++)	10	4	7	++	16	66597120	16	66611007	CKLF	NM_016951_chr16,NM_181640_chr16,NM_001040138_chr16	3,2,3	+++	CMTM1	NM_052999_chr16,NM_181271_chr16,NM_181283_chr16,NM_181272_chr16,NM_181270_chr16,NM_181268_chr16,NM_181269_chr16	3,2,2,2,3,3,3	+++++++	GAAACCACAACATTGACAGTTGGTGGAGGGgatcttaccaacagtatcattacagctgtg	GT-AG	CKLF->CMTM1	2->0
FUS_1045729260_1059758041(--)	1	1	0	--	16	67034541	16	81063322	CES4A	NM_001190201_chr16,NM_001190202_chr16,NM_173815_chr16	1,1,3	+++	CENPN	NM_001100624_chr16	11	+	GCCAGCTGGCCCCAGGACTCCTGCAGGCACctgtagtcccagctactcagaggctgaggc	CT-GC	CENPN->CES4A	->2
FUS_1049352751_2252502873(++)	12	9	5	++	16	70658032	5	170215578	IL34	NM_001172772_chr16	1	+	GABRP	NM_014211_chr5	2	+	AGTTCCAGGGGCTCTGGGAGTGGCTGCCAGgtgattcctacttcagccccttggtgtgag	GT-AG	IL34->GABRP	->
FUS_1054257467_2685571387(+-)	2	2	0	+-	16	75562748	8	92115068	CHST5	NM_024533_chr16	3	-	LRRC69	NM_001129890_chr8	1	+	TACAGGCATGAGCCACCGCACCCGGCCTGGgtcaagttgcataactctggacacactttg	CA-GG	LRRC69->CHST5	1->
FUS_1064399423_1229360805(++)	4	2	3	++	16	85704704	19	1038758	KIAA0182	NM_001134473_chr16,NM_014615_chr16	14,15	++	CNN2	NM_004368_chr19,NM_201277_chr19	7,6	++	ACGGCAGAGCAGCTCTCCCACAGCGTGGCGatggggtttccccatgttggccaggctggt	GT-AG	KIAA0182->CNN2	2->
FUS_1072422227_1072466241(++)	5	3	2	++	17	3372692	17	3416706	SPATA22	NM_032598_chr17,NM_001170699_chr17,NM_001170698_chr17,NM_001170697_chr17,NM_001170695_chr17,NM_001170696_chr17	2,2,2,2,2,2	------	TRPV3	NM_145068_chr17	18	-	AATTTATAATATGACATTGTCCCACTAGACctccgtcccccgcacactctgggatgggat	CT-AC	TRPV3->SPATA22	->
FUS_1072424576_1072466243(++)	3	1	2	++	17	3375041	17	3416708	SPATA22	NM_001170698_chr17,NM_001170697_chr17,NM_001170695_chr17,NM_001170696_chr17,NM_032598_chr17,NM_001170699_chr17	1,1,1,1,1,1	------	TRPV3	NM_145068_chr17	18	-	TTTATAATATGACATTGTCCCACTAGACCTccgtcccccgcacactctgggatgggatca	CC-CT	TRPV3->SPATA22	->
FUS_1076627037_2068234611(-+)	8	1	7	-+	17	7577502	4	177101620	TP53	NM_000546_chr17,NM_001126117_chr17,NM_001126113_chr17,NM_001126112_chr17,NM_001126116_chr17,NM_001126115_chr17,NM_001126114_chr17	7,3,7,7,3,3,7	-------	WDR17	NM_170710_chr4,NM_181265_chr4	31,29	++	CATCCTCACCATCATCACACTGGAAGACTCcaggccaaggcaggtggatcacctgaggtc	CA-GG	TP53->WDR17	1->
FUS_1080948410_1361410483(--)	14	6	11	--	17	11898875	2	73959412	ZNF18	NM_144680_chr17	3	-	TPRKB	NM_016058_chr2	3	-	CCTCAGCCTCCTGAGTTGCTGGGATTACAGattgttgatccatttcagatacttgtggca	GT-AG	ZNF18->TPRKB	->0
FUS_1084292911_2460891729(++)	9	5	5	++	17	15243376	7	26574098	TEKT3	NM_031898_chr17	2	-	KIAA0087	NR_022006_chr7	2	-	GTGACTCAGCAATTCAATTTCTTGGTATGTacctgtaatcccagctactcagggggctga	AC-GC	KIAA0087->TEKT3	->
FUS_1084391052_1084455947(++)	14	3	14	++	17	15341517	17	15406412	CDRT4	NM_173622_chr17	4	-	FAM18B2	NM_145301_chr17	6	-	TCCGGGGAAGTCCAGTGTTTTCTGTGAGTCctgatgaaacttcctcgagggatggcccgg	CT-AC	FAM18B2->CDRT4	2->1
FUS_1084393061_1084455949(++)	13	1	14	++	17	15343526	17	15406414	CDRT4	NM_173622_chr17	3	-	FAM18B2	NM_145301_chr17	6	-	CGGGGAAGTCCAGTGTTTTCTGTGAGTCCTgatgaaacttcctcgagggatggcccgggc	TC-CT	FAM18B2->CDRT4	0->2
FUS_1084393133_1084493410(++)	29	2	46	++	17	15343598	17	15443875	CDRT4	NM_173622_chr17	3	-	FAM18B2	NM_001135036_chr17	6	-	ACTGATTTCTTAACATCACAGGTTCAGATTccagccactttactgtgaaggagaagagtg	CC-CG	FAM18B2->CDRT4	0->
FUS_1084393134_1084498634(++)	38	24	46	++	17	15343599	17	15449099	CDRT4	NM_173622_chr17	3	-	FAM18B2	NM_001135036_chr17,NM_145301_chr17	5,5	--	CTGATTTCTTAACATCACAGGTTCAGATTCcagccactttactgtgaaggagaagagtgc	CT-AC	FAM18B2->CDRT4	2->
FUS_1084492448_2623418321(+-)	13	2	12	+-	17	15442913	8	29962002	FAM18B2	NM_001135036_chr17	6	-	LEPROTL1	NM_015344_chr8,NM_001128208_chr8	3,3	++	TCCAGCCTGGGCGACAGAGCAAGACTCCATcagatgtgctctggcaaatacaatagggag	CT-AC	LEPROTL1->FAM18B2	2->
FUS_1084930379_1939968489(+-)	18	5	21	+-	17	15880844	4	48835498	ZSWIM7	NM_001042697_chr17,NM_001042698_chr17	5,6	--	OCIAD1	NM_017830_chr4,NM_001168254_chr4,NM_001079842_chr4,NM_001079840_chr4,NM_001079839_chr4,NM_001079841_chr4	3,3,3,3,3,3	++++++	CATCCTGGCTAACACGGTGAAACCCCATCTatctgaaccagaagctttcatcattgcatt	CT-AC	OCIAD1->ZSWIM7	0->
FUS_1097450873_1114065605(--)	6	2	4	--	17	28401338	17	45016070	EFCAB5	NR_026738_chr17,NM_001145053_chr17	16,15	++	GOSR2	NM_054022_chr17,NM_004287_chr17	6,6	++	CAGCCTGGGCAACATGGTGAGACCTTGTCTctatcataaagtacttgtcctggaaagccc	CT-AC	GOSR2->EFCAB5	0->
FUS_1098160146_2334327634(+-)	13	1	15	+-	17	29110611	6	71125075	CRLF3	NM_015986_chr17	8	-	FAM135A	NM_001105531_chr6	2	+	CTGAGATCACACCACTGCACTCCAGCCTGAcacagacaacataaggaagaatttgtttgt	GT-GA	FAM135A->CRLF3	->
FUS_1103361023_2868240281(++)	2	4	0	++	17	34311488	9	128419930	CCL14,CCL14,CCL14-CCL15,CCL14-CCL15	NM_032962_chr17,NM_032963_chr17,NR_027921_chr17,NR_027922_chr17	3,2,7,6	----	MAPKAP1	NM_001006618_chr9,NM_001006617_chr9,NM_024117_chr9,NM_001006621_chr9,NM_001006620_chr9,NM_001006619_chr9	4,4,4,2,3,4	------	AGCAGCACTCTGAGGGGTGGTAAGGTCCCCcttgccatcaaatttggaatactcgttaaa	CT-AC	MAPKAP1->CCL14,CCL14,CCL14-CCL15,CCL14-CCL15	2->1
FUS_1106899049_1526424181(--)	9	2	8	--	17	37849514	2	238973110	ERBB2	NM_001005862_chr17	3	+	SCLY	NM_016510_chr2	2	+	TTCATCCTCATCATCTTCACATTGAGTAGGctgctgaatacgggctgctgggatttcccc	CT-AC	SCLY->ERBB2	0->
FUS_1106899049_1526429189(--)	2	1	1	--	17	37849514	2	238978118	ERBB2	NM_001005862_chr17	3	+	SCLY	NM_016510_chr2	4	+	TTCATCCTCATCATCTTCACATTGAGTAGGctgccacttgttcttccaccaggtgctcca	CT-AC	SCLY->ERBB2	0->
FUS_1110165658_2232514682(-+)	5	2	4	-+	17	41116123	5	150227387	AARSD1	NM_001136042_chr17,NM_025267_chr17	7,7	--	IRGM	NM_001145805_chr5	2	+	ACAGTGCTTTTCCCTGAGGGCGGGGGACAGatggagtcttgctctgttgccaggctggag	GT-AG	AARSD1->IRGM	2->
FUS_1110503085_1287313433(+-)	1	1	0	+-	17	41453550	19	58991386	LOC100130581	NR_027413_chr17	4	-	ZNF446	NM_017908_chr19	6	+	TGGTGCCAGCTGATCCATCAAGTGCAGGGTccgagcgcaggcttctgcagacgcctgtcc	CT-AC	ZNF446->LOC100130581	0->
FUS_1110990064_2534029522(+-)	15	8	19	+-	17	41940529	7	99711891	CD300LG	NM_145273_chr17	7	+	TAF6	NM_005641_chr7,NR_033792_chr7,NM_001190415_chr7,NM_139315_chr7	2,2,2,2	----	CCTCAGCCTCCCGAGTAGCTGGGATTACAGggtctccgtctctccaccgggggcttcatc	GC-AG	CD300LG->TAF6	->1
FUS_1112757059_1112933911(++)	5	3	2	++	17	43707524	17	43884376	MGC57346	NR_026680_chr17,NR_027295_chr17	3,3	++	CRHR1	NM_004382_chr17,NM_001145148_chr17,NM_001145146_chr17,NM_001145147_chr17	2,2,2,2	++++	CATCAGCCGCTACGTGACTCTTTTCTCCAGgcccttctccttctggggctgaaccccgtc	GT-AG	MGC57346->CRHR1	->0
FUS_1115705278_2964176945(+-)	2	6	0	+-	17	46655743	X	83126578	HOXB4	NM_024015_chr17	1	-	CYLC1	NM_021118_chrX	3	+	AAATTTATTCCGACCCCTGACTCGTTTTCCagtaactgttatttgtgatttcaaaggtct	TG-AC	CYLC1->HOXB4	2->
FUS_1117658223_1286523032(--)	13	2	11	--	17	48608688	19	58200985	MYCBPAP	NM_032133_chr17	19	+	ZNF551	NM_138347_chr19	3	+	AGTCACCAGGGTGTCCAGCAGCCCACGGACcatgttgcccaggctggtcttgaactcctg	CT-AC	ZNF551->MYCBPAP	->0
FUS_1117822098_2076483123(++)	2	1	1	++	17	48772563	4	185350132	ANKRD40	NM_052855_chr17	5	-	IRF2	NM_002199_chr4	2	-	CAGCCTGGGCCACATAGTGAGACCCTGTCTcttgttaagccacttgagccccgggatcgt	CT-AC	IRF2->ANKRD40	2->
FUS_1126401783_2738223031(--)	6	1	6	--	17	57352248	8	144766712	GDPD1	NM_182569_chr17	10	+	ZNF707	NM_001100598_chr8,NM_001100599_chr8,NM_173831_chr8	1,1,1	+++	TGAGCCAAGATCGCACCACTGCACTCCGGCcacaggggcgtcctccactaggatgctgca	CT-AC	ZNF707->GDPD1	->
FUS_1128807120_1725697981(--)	10	1	10	--	17	59757585	3	32587454	BRIP1	NM_032043_chr17	20	-	DYNC1LI1	NM_016141_chr3	3	-	CAGCCTCCTGCGTAGCTGGGATTACAGGTGaagatggagctggaaaaacaagcttaataa	TA-TG	BRIP1->DYNC1LI1	->1
FUS_1136000895_2859196034(--)	1	1	0	--	17	66951360	9	119375683	ABCA8	NM_007168_chr17	1	-	ASTN2	NM_001184735_chr9	5	-	TCTAGATTCCTTGCTTCCATTTTCCCAGAAgctttggtatcaggatgatgttggcctcat	GT-AG	ABCA8->ASTN2	->
FUS_1142934920_2836875700(+-)	18	3	19	+-	17	73885385	9	97055349	TRIM65	NM_173547_chr17	6	-	ZNF169	NM_194320_chr9	4	+	CGAACTCCTGACCTTGTGATCCGCCTGCCTggacaaaggtccagaagatgttcgttctcc	CG-CT	ZNF169->TRIM65	1->
FUS_1144138964_1144188263(++)	6	2	4	++	17	75089429	17	75138728	C17orf86	NR_027058_chr17	3	+	SEC14L1	NM_001143998_chr17,NM_001039573_chr17,NM_003003_chr17	2,2,2	+++	AAGGAATTGTTTTGGCCTAGGATCATCCAGctagacttcgggctccttgaggatattcag	GT-AG	C17orf86->SEC14L1	->
FUS_1156136902_1766545347(++)	2	69	0	++	18	5892103	3	73434820	TMEM200C	NM_001080209_chr18	1	-	PDZRN3	NM_015009_chr3	9	-	GGAGTGCAGGACTAGCCTCTGGGATGGAGGctgctgcagcacgctagctgtgaattgcat	CT-AC	PDZRN3->TMEM200C	2->
FUS_1163261988_2257830550(--)	4	3	1	--	18	13017189	5	175543255	CEP192	NM_032142_chr18	7	+	FAM153B	NM_001079529_chr5	22	+	ATCATAAAACATTTCATCATCAATATCATCcatactatggatttgttttaaaaatgaggt	AT-AC	FAM153B->CEP192	->0
FUS_1179895609_2896358127(+-)	10	1	9	+-	18	29650810	X	15307760	RNF125	NM_017831_chr18	6	+	ASB11	NM_080873_chrX,NM_001012428_chrX	5,5	--	CCTCAGCTTCCCGAGTAGCTGGGATTATAGgtcacagagagtgcatggagatcctgctgg	GC-AG	RNF125->ASB11	->1
FUS_1193673726_1686295759(-+)	4	2	2	-+	18	43428927	22	44489808	KIAA1632	NM_020964_chr18	44	-	PARVB	NM_001003828_chr22,NM_013327_chr22	3,2	++	CCTCAGCCTCCCAAGGAGCCAGGACTACAGtgagtgacctgcaggaagaaggcaagaatg	GT-AG	KIAA1632->PARVB	->1
FUS_1198745730_1198818089(++)	5	4	1	++	18	48500931	18	48573290	ELAC1	NM_018696_chr18	2	+	SMAD4	NM_005359_chr18	2	+	CACAGCTTATGAAAAGCCAACTTAAAGCAGgttatcctgaatacatgtctaacaattttc	GT-AG	ELAC1->SMAD4	0->
FUS_1202048872_2685552661(--)	2	237	0	--	18	51804073	8	92096342	POLI	NM_007195_chr18	4	+	OTUD6B	NM_016023_chr8	6	+	CAACAACTGGACTAAATTCTTCCAGTAATTacaagtattagtggtttttttgaatattct	CT-AC	OTUD6B->POLI	1->1
FUS_1215419139_2855842938(+-)	6	1	5	+-	18	65174340	9	116022587	DSEL	NM_032160_chr18	2	-	SLC31A1	NM_001859_chr9	5	+	TGTGGTGGCTCATGCCTGTAATCCCAGCATgtttgcaggaggtgaggaaagctcagcatc	TT-CT	SLC31A1->DSEL	1->
FUS_1231941034_2950548017(+-)	1	5	0	+-	19	3618987	X	69497650	C19orf29	NM_021231_chr19,NM_001080543_chr19	6,6	--	ARR3	NM_004312_chrX	10	+	GTTCTTGCCCTGCTCCAGCTCCATGTAGACctgaaatcttgatttttttgatgaccttgt	CT-AC	ARR3->C19orf29	0->0
FUS_1236017557_1879413697(--)	1	1	0	--	19	7695510	3	186303170	LOC100131801	NM_001171155_chr19,NR_033242_chr19	2,2	++	DNAJB11	NM_016306_chr3	10	+	CTGTATGACATCGTCCTCAAACCACTCGGCcttctgcactgacccttgtttcagtagctg	CT-AC	DNAJB11->LOC100131801	2->0
FUS_1237619786_2740091980(++)	4	1	3	++	19	9297739	9	271629	OR7D2	NM_175883_chr19	1	+	DOCK8	NM_203447_chr9	2	+	TCAGCCTCCTGAGTAGCTGAGATTACAGGTattcttcagcggaaataaggaaacagttta	GT-GT	OR7D2->DOCK8	->1
FUS_1238655765_2440110241(--)	14	5	12	--	19	10333718	7	5792610	S1PR2	NM_004230_chr19	2	-	RNF216	NM_207116_chr7,NM_207111_chr7	3,3	--	CCTGAGCCTCCTGAGTAGCTGGGATTACAGagtggatcaatctccgagatgggcccatca	GT-AG	S1PR2->RNF216	->1
FUS_1238792025_2082724569(+-)	7	1	6	+-	19	10469978	5	437274	TYK2	NM_003331_chr19	15	-	AHRR	NM_020731_chr5	12	+	CGTGCTCCACGTACTCTGTCACCATGATATccaggctggtcttgaactcctgggcttaag	CT-GC	AHRR->TYK2	->1
FUS_1238810938_1979358287(--)	9	2	7	--	19	10488891	4	88225296	TYK2	NM_003331_chr19	3	-	HSD17B13	NM_178135_chr4,NM_001136230_chr4	7,6	--	GAAGTCTGCATCCACATTGCACATAAAGTTgtagagacggggtttcaccatgttagccaa	GG-TT	TYK2->HSD17B13	2->
FUS_1241259640_1585684643(-+)	1	1	0	-+	19	12937593	20	55034148	RTBDN	NM_001080997_chr19,NM_031429_chr19	5,6	--	CASS4	NM_001164114_chr20,NM_020356_chr20,NM_001164116_chr20,NM_001164115_chr20	6,6,7,5	++++	GGGCTGTGAGCCCAGCTGCCTTACCTATGGacaggctggagtgcagtggcgcgatctcag	AC-AC	RTBDN->CASS4	1->
FUS_1244928710_1244952025(++)	2	2	1	++	19	16606663	19	16629978	CALR3	NM_145046_chr19	2	-	CHERP	NM_006387_chr19	17	-	TGGACTGCAACCATCGGTTTCTCCAATGCTactcgtccctggccttcatgcgggcgatga	CT-AC	CHERP->CALR3	0->1
FUS_1245720214_2300814144(-+)	10	7	6	-+	19	17398167	6	37611585	ANKLE1	NM_152363_chr19	9	+	MDGA1	NM_153487_chr6	14	-	ACAATCTCAGCTCACTGCAACCTCCACCTCcgatgtgtttcccgtacatgtggtagaaga	CT-AC	MDGA1->ANKLE1	0->
FUS_1246504062_1326246412(++)	15	4	14	++	19	18182015	2	38795341	IL12RB1	NM_153701_chr19	10	-	HNRPLL	NM_138394_chr2,NM_001142650_chr2	12,13	--	CAGCCTGGCCAACGTGGTGAAACCCCGTCTtcggcactcttatctgatagtgattcagtg	CT-AC	HNRPLL->IL12RB1	0->
FUS_1246798385_2203935274(--)	3	1	2	--	19	18476338	5	121647979	PGPEP1	NM_017712_chr19	5	+	SNCAIP	NM_005460_chr5	1	+	CAGCCTGGGCAACATGGTGAAACCCTGTCTccggggcgcccggcgcgccggcggctcagg	GT-AC	SNCAIP->PGPEP1	->
FUS_1247960626_1247967890(++)	6	1	5	++	19	19638579	19	19645843	NDUFA13	NM_015965_chr19	4	+	YJEFN3	NM_198537_chr19,NM_001190328_chr19	4,3	++	ATCATCATGAAGGACGTGCCCGACTGGAAGgcgttcccgttgcccgctctctcccggaag	GT-AG	NDUFA13->YJEFN3	2->0
FUS_1249043194_2216235741(--)	7	4	4	--	19	20721147	5	133948446	ZNF737	NM_001159293_chr19	4	-	SAR1B	NM_001033503_chr5,NM_016103_chr5	5,4	--	GAGGAAGTAACTTGTGGAATGCTGAGAAAGcttccgaagaactgaccattgctggcatga	GT-AG	ZNF737->SAR1B	->1
FUS_1252424928_1746384798(-+)	6	4	3	-+	19	24102881	3	53274271	ZNF726	NM_001190829_chr19	3	+	TKT	NM_001135055_chr3,NM_001064_chr3	4,4	--	GCCTGGGTGACAGAGCGAGACTCCATCTGGccttgtcgaagtatttgccggtgtaggcca	GG-GG	TKT->ZNF726	0->0
FUS_1258512433_1680334789(++)	9	2	7	++	19	30190386	22	38528838	C19orf12	NM_001031726_chr19,NM_031448_chr19	3,3	--	PLA2G6	NM_001199562_chr22,NM_001004426_chr22,NM_003560_chr22	7,7,7	---	TCCAGCCCGGGCGACAGTGCGAGACTCCATcgacatggccaggtgcagcggggtgttgcc	CT-AC	PLA2G6->C19orf12	2->
FUS_1263167410_2413294857(++)	3	2	1	++	19	34845363	6	150092298	KIAA0355	NM_014686_chr19	14	+	PCMT1	NM_005389_chr6	2	+	TGGGAGGCCGAGGCAGGTGGATCACCTAAGaaaatggaatcatcaagacagataaagtat	GT-AG	KIAA0355->PCMT1	->1
FUS_1265324475_2871623082(-+)	5	2	3	-+	19	37002428	9	131802731	ZNF260	NM_001012756_chr19,NM_001166036_chr19,NM_001166037_chr19,NM_001166038_chr19	4,4,3,3	----	FAM73B	NM_032809_chr9	2	+	CCTCAGCCTCTTGAGTAGCTGGGATTACAGctctgtggaggggccctctggtatgtgtgt	GC-AG	ZNF260->FAM73B	->
FUS_1265394762_2478283786(+-)	18	7	15	+-	19	37072715	7	43966155	ZNF529	NR_027239_chr19	3	-	UBE2D4	NM_015983_chr7	1	+	CAGATGCTGGCACTATGCTTCTTGTACAGCcttctggatccgctttagcgccatcctacc	CT-AC	UBE2D4->ZNF529	2->
FUS_1265394808_2684485671(-+)	5	1	4	-+	19	37072761	8	91029352	ZNF529	NR_027239_chr19	3	-	DECR1	NM_001359_chr8	2	+	GTGTTGCTATAAAGGAATACCTGAGGCTGGtttttcagttatgggacaaaaatattatat	GT-AG	ZNF529->DECR1	->0
FUS_1266202996_1331452353(--)	11	7	6	--	19	37880949	2	44001282	ZNF527	NM_032453_chr19	5	+	DYNC2LI1	NM_016008_chr2,NM_001193464_chr2,NM_015522_chr2	1,1,1	+++	AGCCTGGGCAACAGAGCGAGACTCTGTCTGggcatcgtcgacggcctggctgccgcaaac	AA-TG	DYNC2LI1->ZNF527	1->
FUS_1267738987_1267755370(++)	7	4	4	++	19	39416940	19	39433323	SARS2	NM_001145901_chr19,NM_017827_chr19	2,2	--	FBXO17	NM_024907_chr19,NM_148169_chr19	6,6	--	CAGCTGCCTCAGCTCCTGCCATGTCGAGATgtctctcccgtactgctcaaaagatacgta	CT-AC	FBXO17->SARS2	2->0
FUS_1268014142_2477898395(++)	18	7	12	++	19	39692095	7	43580764	NCCRP1	NM_001001414_chr19	6	+	HECW1	NM_015052_chr7	25	+	TCAGCCTCTCAAGTAGCTGGGATTACAGGTtcaggtttagcggtcgcatcctgggtctgg	GC-GT	NCCRP1->HECW1	->1
FUS_1270088287_1423950652(--)	2	2	0	--	19	41766240	2	136499581	AXL	NM_001699_chr19,NM_021913_chr19	19,20	++	UBXN4	NM_014607_chr2	1	+	ACTCCAGCCTGGGTGACACAGTGAGACTCTctgccacgaacaccacgaagaccgcgccgc	AT-AC	UBXN4->AXL	0->
FUS_1270206471_1270238589(++)	3	1	2	++	19	41884424	19	41916542	TMEM91	NM_001098825_chr19,NM_001098824_chr19,NM_001098823_chr19,NM_001042595_chr19,NM_001098822_chr19,NM_001098821_chr19	2,2,2,2,2,2	++++++	BCKDHA	NM_001164783_chr19,NM_000709_chr19	2,2	++	CTGGGGGAACCAAGGCCCCCTGATGTTGAGcacccccccaggcagcagcagcagttttca	GT-AG	TMEM91->BCKDHA	2->0
FUS_1270210726_1270238592(++)	1	1	0	++	19	41888679	19	41916545	TMEM91	NM_001098825_chr19,NM_001098824_chr19,NM_001098823_chr19,NM_001042595_chr19,NM_001098822_chr19,NM_001098821_chr19	3,3,3,3,3,3	++++++	BCKDHA	NM_001164783_chr19,NM_000709_chr19	2,2	++	GGGGAACCAAGGCCCCCTGATGTTGAGGACccccccaggcagcagcagcagttttcatct	AT-AC	TMEM91->BCKDHA	2->0
FUS_1272657579_1516223037(--)	6	1	6	--	19	44335532	2	228771966	ZNF283	NM_181845_chr19	3	+	WDR69	NM_178821_chr2	10	+	CAGCCTGGGCGACAGAGCGAGACTCCATCAtcagctgaagcagttgcaataagctttcca	GC-CA	WDR69->ZNF283	1->
FUS_1274379216_1274427400(++)	5	3	2	++	19	46057169	19	46105353	OPA3	NM_025136_chr19	2	-	GPR4	NM_005282_chr19	1	-	TCTTGGTCCGCATCTCCACCCAGTGATACActgcgcgcggcgactggacggggcgggcgg	CT-AC	GPR4->OPA3	->1
FUS_1276567640_1288584384(++)	1	1	0	++	19	48245593	2	1133313	EHD2	NM_014601_chr19	6	+	SNTG2	NM_018968_chr2	5	+	CTGTCGCCCAGGCTGGAGTGCAGTGGTGAGcagacagggatgttgttcgtaggagatgct	AT-AC	EHD2->SNTG2	->0
FUS_1276665850_1321187952(++)	20	1	21	++	19	48343803	2	33736881	CRX	NM_000554_chr19	4	+	RASGRP3	NM_170672_chr2,NM_001139488_chr2	3,2	++	TCAGCCTCCCGAGTAGCTGGGACTACAGATttggaactgtatctgtatggaaacaacaga	GC-AT	CRX->RASGRP3	->
FUS_1276696380_1533123842(++)	12	1	12	++	19	48374333	20	2473347	SULT2A1	NM_003167_chr19	6	-	ZNF343	NM_024325_chr20	5	-	TTGGCCAGGATGGTCTCGATCTCCTGACCCaatgagagaagattcctgtaattctccagc	CG-CC	ZNF343->SULT2A1	1->
FUS_1278735188_1278777195(++)	17	7	16	++	19	50413141	19	50455148	NUP62	NM_016553_chr19,NM_153719_chr19,NM_001193357_chr19,NM_153718_chr19,NM_012346_chr19	3,3,2,2,2	-----	SIGLEC11	NM_052884_chr19,NM_001135163_chr19	10,9	--	CCGTCGGTGTCTGCAGCCTTGGGAAGATTTctgggagatgggtcccagggtggagggcac	CT-AC	SIGLEC11->NUP62	2->
FUS_1282876749_1737596081(++)	11	5	7	++	19	54554702	3	44485554	VSTM1	NM_198481_chr19	4	-	ZNF445	NM_181489_chr3	8	-	TTGAGGGAGCTTCAAGTTCATCGTGTTTATctgagcctgggaggtcaaggctgcagtaag	CT-AC	ZNF445->VSTM1	->1
FUS_1282932165_2619819566(-+)	27	6	43	-+	19	54610118	8	26363247	NDUFA3	NM_004542_chr19	4	+	PNMA2	NM_007257_chr8	3	-	CGGGCATGTTCCCATCATCACGGACGGGCActgtaatcccagcactttgggaggccgagg	CT-AC	PNMA2->NDUFA3	->1
FUS_1284183378_2431669994(++)	7	1	6	++	19	55861331	6	168467435	COX6B2	NM_144613_chr19	5	-	FRMD1	NM_001122841_chr6,NM_024919_chr6	4,4	--	CCTGACCAACACGGAGAAACCCCGTCTCTActtatgacccttccgttttccacgtagtgc	CT-AC	FRMD1->COX6B2	1->
FUS_1284198761_2147305536(+-)	12	9	6	+-	19	55876714	5	65018241	IL11	NM_000641_chr19	5	-	NLN	NM_020726_chr5	1	+	TCCAGCCTAGGCAACAGAGCGAGACTCCATctgcggaggcttcgcacagccaaaaggcac	CT-AC	NLN->IL11	1->
FUS_1285623365_1285650992(--)	1	1	0	--	19	57301318	19	57328945	ZIM2	NM_001146326_chr19,NM_001146327_chr19,NM_015363_chr19	9,9,8	---	PEG3	NM_001146187_chr19,NM_006210_chr19,NM_001146186_chr19,NM_001146185_chr19,NM_001146184_chr19	9,10,7,9,9	-----	GAAAACTACAGGAAGCTGCTCTCCCTCGGTctaaaaactatgcctgaagccaaaaaatca	TT-GT	ZIM2->PEG3	2->0
FUS_1286233990_2238999644(++)	9	2	8	++	19	57911943	5	156712349	ZNF548	NM_152909_chr19,NM_001172773_chr19	3,4	++	CYFIP2	NM_001037332_chr5,NM_001037333_chr5,NM_014376_chr5	2,2,2	+++	CCTCACCCTCCCGAGTAGCTGGGACTACAGtgcagaatacagaaactgcagccatgacca	GT-AG	ZNF548->CYFIP2	->
FUS_1286338072_2547075754(-+)	1	4	0	-+	19	58016025	7	112758123	ZNF773	NM_198542_chr19	2	+	LOC401397	NR_024412_chr7,NR_015442_chr7	2,2	--	AGCCACGTCCTCAAAGGTCACATAGCCCTGcaaagaaatggtatatatagaattctatct	CT-AC	LOC401397->ZNF773	->0
FUS_1287407922_1842161923(+-)	13	2	11	+-	19	59085875	3	149051396	LOC100131691	NR_027334_chr19	6	+	TM4SF18	NM_138786_chr3	1	-	TCTCGGCTCACTGCAACCTCCGTCTCCCAGtaaaccagtatttcacactgagattgtcgg	GT-AG	LOC100131691->TM4SF18	->
FUS_1287409002_3036285310(++)	2	2	0	++	19	59086955	X	155234943	MGC2752	NR_026052_chr19	1	+	IL9R	NR_024033_chrX,NM_002186_chrX	7,6	++	AAAGCAGACGGCTCGCACTGCGACCCGAAGcaggcccagcacagggatcacattgtcggg	GT-AG	MGC2752->IL9R	->0
FUS_1305378289_1556078297(+-)	11	1	12	+-	2	17927218	20	25427802	SMC6	NM_001142286_chr2,NM_024624_chr2	3,2	--	GINS1	NM_021067_chr20	7	+	AATTTTCTTCCTTTCTTTTGGCCATCAGGTttgggaggctgagacaagagaatcacttga	CT-AC	GINS1->SMC6	->
FUS_1308274727_1971955890(--)	4	6	0	--	2	20823656	4	80822899	HS1BP3	NM_022460_chr2	6	-	ANTXR2	NM_058172_chr4	17	-	CCACAGGGACGCCTCCAAGGAACTGTTCAGatgggaccatctagttgcaggaaaacaagc	GT-AG	HS1BP3->ANTXR2	1->
FUS_1312712474_1679768030(++)	10	2	9	++	2	25261403	22	37962079	LOC729723	NR_034113_chr2	3	+	CDC42EP1	NM_152243_chr22	2	+	CCTCAGCCTCCTGGGTAGCTGGGATTACAGgtctccacctctgggcaggagagttgccga	GC-AG	LOC729723->CDC42EP1	->
FUS_1314454028_1939977647(++)	10	1	10	++	2	27002957	4	48844656	C2orf18	NM_017877_chr2	6	+	OCIAD1	NM_017830_chr4,NM_001168254_chr4,NM_001079842_chr4,NM_001079840_chr4,NM_001079839_chr4,NM_001079841_chr4	4,4,4,4,4,4	++++++	GCCTCCCAAAGTGCTGGGATTACAGACCTGtgcctttggctgcaacaagtatgttgatta	AG-TG	C2orf18->OCIAD1	->1
FUS_1321152845_2368750940(+-)	15	3	17	+-	2	33701774	6	105548381	RASGRP3	NM_001139488_chr2	1	+	BVES	NM_007073_chr6,NM_001199563_chr6,NM_147147_chr6	8,8,8	---	TGTGAAAAATACCACGACAAAACCACCCTAatggagtttcactctgtcgcccaggctgga	GT-AG	RASGRP3->BVES	->
FUS_1321187951_1737607715(-+)	14	1	13	-+	2	33736880	3	44497188	RASGRP3	NM_170672_chr2,NM_001139488_chr2	3,2	++	ZNF445	NM_181489_chr3	3	-	CTGTTGTTTCCATACAGATACAGTTCCAAAtctgtagtcccagctactcgggaggctgag	TC-TT	ZNF445->RASGRP3	->
FUS_1324827152_1338025076(++)	12	3	9	++	2	37376081	2	50574005	EIF2AK2	NM_001135651_chr2,NM_002759_chr2	2,2	--	NRXN1	NM_138735_chr2	1	-	GTTGATTCTGAAGACCGCCAGAGAAGCAAAcctgcgccgccgccgccgccgccgccgccg	CC-CC	NRXN1->EIF2AK2	1->
FUS_1326055356_2894728138(-+)	2	2	0	-+	2	38604285	X	13677771	ATL2	NR_024191_chr2,NM_001135673_chr2,NM_022374_chr2	1,1,1	---	TCEANC	NM_152634_chrX	3	+	TTAACCACGTCTCGTCCACGACCTCCCTAGagtctcgctctgtcgccaggttggagtgca	GT-AG	ATL2->TCEANC	0->
FUS_1330287671_1821403672(-+)	7	1	9	-+	2	42836600	3	128293145	MTA3	NM_020744_chr2	4	+	C3orf27	NM_007354_chr3	3	-	AACTGTTGTTTCAGATTCTTCCTCAATTTCttctgtaatcccagctactcaggaggctga	TT-TT	C3orf27->MTA3	->0
FUS_1331452356_2296470993(+-)	12	1	12	+-	2	44001285	6	33268434	DYNC2LI1	NM_016008_chr2,NM_001193464_chr2,NM_015522_chr2	1,1,1	+++	TAPBP	NM_172209_chr6,NM_003190_chr6	7,8	--	TGCGGCAGCCAGGCCGTCGACGATGCCCAGacagagtctcgctctgttgcccaggctgga	GT-AG	DYNC2LI1->TAPBP	1->
FUS_1334495119_1334506292(++)	25	6	30	++	2	47044048	2	47055221	LOC388948	NR_034099_chr2	1	+	LOC100134259	NR_024452_chr2	1	+	CACAGGTGGAGCTGACCATGAGGACTGTCAcagatgattccaatgtacagccaatgatga	CA-GC	LOC388948->LOC100134259	->
FUS_1334495122_1334534133(++)	29	12	30	++	2	47044051	2	47083062	LOC388948	NR_034099_chr2	1	+	LOC100134259	NR_024452_chr2	2	+	AGGTGGAGCTGACCATGAGGACTGTCACAGatgattccaatgtacagccaatgatgagca	GT-AG	LOC388948->LOC100134259	->
FUS_1334587386_1843450699(-+)	9	1	9	-+	2	47136315	3	150340172	MCFD2	NM_001171507_chr2,NM_001171506_chr2,NM_139279_chr2,NM_001171508_chr2	2,3,2,2	----	SELT	NM_016275_chr3	2	+	TCAGCCTCCCAAAGTGCTGGGATTACAGATtgtttcctgaggttataggcgggtgtttga	AT-AG	MCFD2->SELT	->2
FUS_1348728982_2262953877(+-)	16	5	13	+-	2	61277911	5	180666582	PEX13	NM_002618_chr2	4	+	GNB2L1	NM_006098_chr5	4	-	GTAGCTGGGACTACAGGCGCCTGCCACCAGgatgagagccactcagagtgggtgtcttgt	GC-AG	PEX13->GNB2L1	->0
FUS_1349504042_1419738293(-+)	10	1	9	-+	2	62052971	2	132287222	FAM161A	NM_032180_chr2	6	-	CCDC74A	NM_138770_chr2	2	+	GGAGATCGAGACCATCCTGGCTAACACGATctccattacaagctcataatgaatcagaca	GA-AT	FAM161A->CCDC74A	->0
FUS_1355853605_2871703143(++)	7	1	7	++	2	68402534	9	131882792	PNO1	NM_020143_chr2	7	+	PPP2R4	NM_178003_chr9,NM_001193397_chr9,NM_178001_chr9,NM_021131_chr9,NM_178000_chr9	2,2,2,3,2	+++++	CTTCAGCCTCCCTAGTAGCTGGGACTACAGattcttcagaggaggcccctccagccactc	GT-AG	PNO1->PPP2R4	->1
FUS_1357582628_1357594324(++)	11	5	7	++	2	70131557	2	70143253	SNRNP27	NM_006857_chr2	6	+	MXD1	NM_002357_chr2	2	+	AACAGGATCTCAGTTCTCCTTTCTTGTAAAaagctgaacatggttatgcctccatgttac	GT-AG	SNRNP27->MXD1	->1
FUS_1361410483_1750722838(++)	4	3	1	++	2	73959412	3	57612311	TPRKB	NM_016058_chr2	3	-	FAM116A	NM_152678_chr3	20	-	TGCCACAAGTATCTGAAATGGATCAACAATctgtaatcccagctactcaggaggctgagg	CT-AC	FAM116A->TPRKB	->0
FUS_1362094439_2297411218(+-)	30	14	28	+-	2	74643368	6	34208659	C2orf81	NM_001145054_chr2	2	-	HMGA1	NM_145903_chr6,NM_145902_chr6,NM_002131_chr6,NM_145905_chr6,NM_145901_chr6,NM_145899_chr6	2,2,3,2,2,3	++++++	CCCGCGGTCTCGGACCTGCCTCTCCTGCCTcggaggctgcttgcgcggcctgccccggcc	CT-AC	HMGA1->C2orf81	2->0
FUS_1384748120_2220953807(-+)	4	2	2	-+	2	97297049	5	138666512	KIAA1310	NM_017991_chr2,NM_001115016_chr2	3,3	--	MATR3	NM_001194955_chr5,NM_001194956_chr5,NM_018834_chr5,NM_001194954_chr5,NM_199189_chr5,NR_036535_chr5	15,14,15,17,18,17	++++++	ACCAGAGGACTGGGAGGAGCATGTCAACAGggtctcactctgtcacccagactggagtgc	GT-AG	KIAA1310->MATR3	1->
FUS_1400547684_2928755873(++)	10	3	10	++	2	113096613	X	47705506	ZC3H6	NM_198581_chr2	12	+	ZNF81	NM_007137_chrX	2	+	TCAGCCTCCCGAGTAGCTGGAATTACAGACttcttggagtctctgcggagtccctgggcc	GC-AG	ZC3H6->ZNF81	->
FUS_1457811905_1457818468(++)	7	1	8	++	2	170360834	2	170367397	BBS5	NM_152384_chr2	11	+	KBTBD10	NM_006063_chr2	1	+	CTTTTGTGGCTTATTTTGCTGATGGCAATAagctcgatagcatagcatctgaatgggttg	AG-CC	BBS5->KBTBD10	0->1
FUS_1457811907_1457822155(++)	8	3	8	++	2	170360836	2	170371084	BBS5	NM_152384_chr2	11	+	KBTBD10	NM_006063_chr2	2	+	TTTGTGGCTTATTTTGCTGATGGCAATAAGctcgatagcatagcatctgaatgggttgga	GT-AG	BBS5->KBTBD10	2->0
FUS_1457812062_1457822156(++)	6	1	8	++	2	170360991	2	170371085	BBS5	NM_152384_chr2	12	+	KBTBD10	NM_006063_chr2	2	+	TTGTGGCTTATTTTGCTGATGGCAATAAGCtcgatagcatagcatctgaatgggttggac	AA-GC	BBS5->KBTBD10	0->1
FUS_1463140233_2390962849(--)	2	4	0	--	2	175689162	6	127760290	CHN1	NM_001025201_chr2,NM_001822_chr2	8,8	--	KIAA0408,C6orf174	NM_014702_chr6,NM_001012279_chr6	6,12	--	GTCTCATTGCTCAGGGAGTGAAATGTGCAGttctggaggctgggaagtccaagatcaagc	GT-AG	CHN1->KIAA0408,C6orf174	0->
FUS_1475781035_2458046527(-+)	2	2	0	-+	2	188329964	7	23728896	TFPI	NM_006287_chr2	8	-	C7orf46	NM_001127365_chr7,NM_199136_chr7,NM_001127364_chr7	2,3,3	+++	TCCCAAAGTGCTGGGATTACAGGTATAAACaacataaaactgacttggaagcgattcctc	CA-AC	TFPI->C7orf46	->1
FUS_1475819568_1977058471(+-)	5	3	4	+-	2	188368497	4	85925480	TFPI	NM_006287_chr2,NM_001032281_chr2	2,2	--	NCRNA00247	NR_015359_chr4	3	+	CATGTACTTTCTTCATTGTGTAAATCATCTagttctggaggctgtaaaatccaagatcaa	CT-AC	NCRNA00247->TFPI	->
FUS_1475870147_1747784159(++)	13	7	9	++	2	188419076	3	54673632	TFPI	NM_006287_chr2,NM_001032281_chr2	1,1	--	ESRG	NR_027122_chr3	1	-	CAGATCAAGAAACTGGCGATTGAAGAGTAAcggatttgaaattggtgagatgtttcttgg	CT-AC	ESRG->TFPI	->
FUS_1489177656_1489187237(++)	8	3	5	++	2	201726585	2	201736166	CLK1	NM_001162407_chr2,NM_004071_chr2,NR_027856_chr2,NR_027855_chr2	2,2,2,2	----	PPIL3	NM_130906_chr2,NM_032472_chr2	7,7	--	AGGACAGTAAGTTCTCTTTGAGTGTCTCATatcattaagaggtcggtatgtcttctcatt	CT-AC	PPIL3->CLK1	2->0
FUS_1489592758_2230663114(+-)	4	4	1	+-	2	202141687	5	148375819	CASP8	NM_001228_chr2,NM_033355_chr2,NM_001080124_chr2,NM_033358_chr2,NM_033356_chr2,NM_001080125_chr2	8,8,7,7,6,7	++++++	SH3TC2	NM_024577_chr5	17	-	ATTAGGGACAGGAATGGAACACACTTGGATgcagggtctcactctgttgcccaggctgga	GC-AG	CASP8->SH3TC2	2->
FUS_1491240209_2650193845(++)	1	1	0	++	2	203789138	8	56737526	ALS2CR8	NM_024744_chr2	3	+	TGS1	NM_024831_chr8	13	+	ATTTCAAGTTGATTTGCTATCTGGTGTGAGgctggagtgcagtgccatgatcacagctca	GT-AG	ALS2CR8->TGS1	->
FUS_1494628487_1876817697(+-)	3	2	2	+-	2	207177416	3	183707170	ZDBF2	NM_020923_chr2	5	+	ABCC5	NM_005688_chr3,NM_001023587_chr3	3,3	--	CTCAGCCTCCCAAAGTGCTGGGATTACAGTtggaatgccaagatgccttggaaacagcag	CA-GT	ZDBF2->ABCC5	->1
FUS_1495925965_2636493607(-+)	8	2	8	-+	2	208474894	8	43037288	FAM119A	NM_001127395_chr2,NM_145280_chr2	4,4	--	HGSNAT	NM_152419_chr8	11	+	GCTGCAATCTCGGCTCTCCGGGAGGCCAAGtgtcttgggacaaggtgcgcattcctggtg	GC-AG	FAM119A->HGSNAT	->1
FUS_1496487783_1881711239(-+)	3	1	2	-+	2	209036712	3	188600712	C2orf80	NM_001099334_chr2	7	-	LPP	NM_001167672_chr3,NM_005578_chr3,NM_001167671_chr3	10,11,11	+++	CCAAAGCAGCAGCATACGCCCGCAAACAGAtagagacggggtttcaccgtggtctcgatc	GT-AG	C2orf80->LPP	0->
FUS_1503664890_2363183363(--)	4	2	3	--	2	216213819	6	99980804	ATIC	NM_004044_chr2	15	+	LOC100130890	NM_001195131_chr6	4	+	AACAGTGCCTTCCACTTTATCAAATCTTCAtcctcggcctcccaaagtgctgggattata	TC-CC	LOC100130890->ATIC	->2
FUS_1504312259_1504354985(++)	9	2	8	++	2	216861188	2	216903914	MREG	NM_018000_chr2	2	-	PECR	NM_018441_chr2	8	-	GCTCCAAATGAGGAATATGGATTGTTATCAcaactataagcttttaaaaagtacagaagc	CT-AC	PECR->MREG	->2
FUS_1506608260_2738226483(-+)	14	8	11	-+	2	219157189	8	144770164	TMBIM1	NM_022152_chr2	1	-	ZNF707	NM_173831_chr8	2	+	GCCAGGAACGCTCCGTCTGGAACGGCGCAGatggagtctcactctgttgcccaggctgga	GC-AG	TMBIM1->ZNF707	->
FUS_1520104510_1806916958(++)	8	2	6	++	2	232653439	3	113806431	COPS7B	NM_022730_chr2	2	+	QTRTD1	NM_024638_chr3	10	+	GGAGAACTTCTGGAGCTGGCCAACGTGCAGgagccaggatggtctcgatctcctgacctc	GA-AT	COPS7B->QTRTD1	2->
FUS_1528979960_1528997099(++)	3	2	1	++	2	241528889	2	241546028	CAPN10	NM_023083_chr2,NM_023085_chr2	2,2	++	GPR35	NM_001195381_chr2,NM_001195382_chr2	2,2	++	CGCTGCAGAAGAGCAGGCACCTCCTGGACCaggtctcttgccctgtgcagcttcctgcag	AG-AA	CAPN10->GPR35	0->
FUS_1528979962_1529006876(++)	4	3	1	++	2	241528891	2	241555805	CAPN10	NM_023083_chr2,NM_023085_chr2	2,2	++	GPR35	NM_001195381_chr2,NM_001195382_chr2	3,3	++	CTGCAGAAGAGCAGGCACCTCCTGGACCAGgtctcttgccctgtgcagcttcctgcagac	GT-AG	CAPN10->GPR35	2->
FUS_1528989193_1528996058(++)	4	1	3	++	2	241538122	2	241544987	CAPN10	NM_023083_chr2,NM_023085_chr2	12,10	++	GPR35	NM_001195381_chr2,NM_001195382_chr2	1,1	++	CCTAACAGGGTGGCCCCCTGTGCCAGCTCAgctgacatgggctcattgctccttctccaa	GG-GG	CAPN10->GPR35	->
FUS_1528989194_1528996875(++)	7	4	3	++	2	241538123	2	241545804	CAPN10	NM_023083_chr2,NM_023085_chr2	12,10	++	GPR35	NM_001195381_chr2,NM_001195382_chr2	2,2	++	CTAACAGGGTGGCCCCCTGTGCCAGCTCAGctgacatgggctcattgctccttctccaag	GT-AG	CAPN10->GPR35	->
FUS_1533098899_1533123840(++)	7	2	6	++	20	2448404	20	2473345	SNRPB	NM_198216_chr20,NM_003091_chr20	2,2	--	ZNF343	NM_024325_chr20	5	-	CTGCAGCATCTTGCTGCTCTTGCCCACCGTccaatgagagaagattcctgtaattctcca	CT-AC	ZNF343->SNRPB	0->0
FUS_1534504898_1887901367(+-)	8	1	12	+-	20	3854403	3	194790840	MAVS	NM_020746_chr20	7	+	C3orf21	NM_152531_chr3	4	-	TTGATCTTGGACTTCCCAGCCTCTAGAACTgcacacattctggcagttccgccatgagaa	GT-AG	MAVS->C3orf21	->2
FUS_1551143739_2928570143(+-)	2	112	0	+-	20	20493244	X	47519776	RALGAPA2	NM_020343_chr20	32	-	LOC100133957	NR_027444_chrX	1	+	GTCCTCGGGGCTCCACTGGGGAGGGCTGCCcaacatagtgagactctgtctctacaaaaa	CT-GG	LOC100133957->RALGAPA2	->1
FUS_1561871190_1862209839(--)	4	5	0	--	20	31220695	3	169099312	C20orf203	NM_182584_chr20	5	-	MECOM	NM_004991_chr3	2	-	TTCCTGAGGCCTCCCCAGCCACGCAGAACTataatgagtgtgtatatggcaactaccctg	GT-AG	C20orf203->MECOM	->1
FUS_1564897431_1564911172(++)	30	11	33	++	20	34246936	20	34260677	RBM12,RBM12,CPNE1,CPNE1	NM_006047_chr20,NM_001198838_chr20,NM_152927_chr20,NM_152930_chr20	2,2,2,2	----	NFS1	NM_001198989_chr20,NM_021100_chr20,NR_037570_chr20	11,12,13	---	GTGGGCAACCAATTAAAACCAACTTTTAGActcatttctcgaagacgcttcacatgctga	CT-AC	NFS1->RBM12,RBM12,CPNE1,CPNE1	1->
FUS_1580227876_2541158236(++)	2	2	0	++	20	49577381	7	106840605	MOCS3	NM_014484_chr20	1	+	HBP1	NM_012257_chr7	10	+	CTCACTGCAACCTCCGCCTCCCAGGTTCAAagccataagtgtgatccttggtgacaggtg	GC-AG	MOCS3->HBP1	->2
FUS_1592563138_2281332992(-+)	5	1	4	-+	20	61912643	6	18130433	ARFGAP1	NM_018209_chr20,NM_175609_chr20	8,8	++	TPMT	NM_000367_chr6	9	-	GCTGGCTCCAGTGGTGAAGCTGCTCCAGCCctgaacctgggaggcagaggttgcagtgag	CT-AC	TPMT->ARFGAP1	->0
FUS_1627630756_1627650613(++)	15	6	14	++	21	33954725	21	33974582	TCP10L	NM_144659_chr21	3	-	C21orf59	NR_036552_chr21,NM_021254_chr21	5,6	--	GTGGAGTCTGATGATCTGCTGCTGTAATGGcttgagctcctcttgtcttctgtgatagta	CT-AC	C21orf59->TCP10L	2->0
FUS_1627630756_1627652466(++)	23	11	27	++	21	33954725	21	33976435	TCP10L	NM_144659_chr21	3	-	C21orf59	NR_036552_chr21,NM_021254_chr21	3,4	--	GTGGAGTCTGATGATCTGCTGCTGTAATGGctgtgttcccgacaagtcttccttattttc	CT-AC	C21orf59->TCP10L	2->0
FUS_1628301161_1628316849(++)	1	1	0	++	21	34625130	21	34640818	IFNAR2	NM_000874_chr21,NM_207585_chr21,NM_207584_chr21	7,7,7	+++	IL10RB	NM_000628_chr21	2	+	AAAATGCACCCTCCTTCCACCTGGCCAGGActaagttataggatattccaagataaatgc	AT-AC	IFNAR2->IL10RB	1->0
FUS_1628301166_1628324932(++)	13	11	4	++	21	34625135	21	34648901	IFNAR2	NM_000874_chr21,NM_207585_chr21,NM_207584_chr21	7,7,7	+++	IL10RB	NM_000628_chr21	3	+	GCACCCTCCTTCCACCTGGCCAGGAATCAGttataggatattccaagataaatgcatgaa	GT-AG	IFNAR2->IL10RB	0->2
FUS_1628634518_1628955676(++)	1	1	0	++	21	34958487	21	35279645	DONSON	NM_017613_chr21	3	-	ATP5O	NM_001697_chr21	5	-	ATCAGGCTCGGAGAATGATACATGTGAAGTagatgcagaggtcactgtgcaaggtacctc	CT-AC	ATP5O->DONSON	2->0
FUS_1628952356_2945774143(+-)	10	1	11	+-	21	35276325	X	64723776	ATP5O	NM_001697_chr21	6	-	ZC3H12B	NM_001010888_chrX	5	+	TAATTCAGAGAGTGTGGCTTCTTCTAAAGGacctgtaatcccagcactttaggaggccaa	CT-AC	ZC3H12B->ATP5O	->0
FUS_1631341904_1631381975(++)	20	11	13	++	21	37665873	21	37705944	DOPEY2	NM_005128_chr21	37	+	MORC3	NM_015358_chr21	2	+	ATTTTCTGGAACATCCAGAATGTTAACCATctttgcccgaagtttttacatacaaattct	GT-AG	DOPEY2->MORC3	->0
FUS_1631341904_1631385203(++)	20	8	14	++	21	37665873	21	37709172	DOPEY2	NM_005128_chr21	37	+	MORC3	NM_015358_chr21	3	+	ATTTTCTGGAACATCCAGAATGTTAACCATataatgcttatgatcctgatgtgaacgcta	GT-AG	DOPEY2->MORC3	->1
FUS_1632468632_2954857205(-+)	9	1	8	-+	21	38792601	X	73806838	DYRK1A	NM_130438_chr21,NM_101395_chr21,NM_130436_chr21	1,3,1	+++	RLIM	NM_183353_chrX,NM_016120_chrX	5,4	--	AGGGAAGAGTCCAGCGGCAAAACTATAACActgagcccaggaagtcaaggctgcagtgag	CT-AC	RLIM->DYRK1A	->
FUS_1639224538_1639231973(++)	17	5	15	++	21	45548507	21	45555942	PWP2	NM_005049_chr21	20	+	C21orf33	NM_198155_chr21,NM_004649_chr21	3,3	++	CCAGCGGCACCTGGACGACCTGTCGAAACTgatcctggtgcacctgagccgtggaggggc	GT-AG	PWP2->C21orf33	1->2
FUS_1639884041_1639902681(++)	16	7	12	++	21	46208010	21	46226650	UBE2G2	NM_003343_chr21,NM_182688_chr21	2,3	--	SUMO3	NM_006936_chr21	4	-	CAATTCCTTCCGGAGGATTCAGTGTTAATTctgaacaaagataacaattctgattggccc	CT-AC	SUMO3->UBE2G2	->1
FUS_1639884041_1639902848(++)	28	13	28	++	21	46208010	21	46226817	UBE2G2	NM_003343_chr21,NM_182688_chr21	2,3	--	SUMO3	NM_006936_chr21	4	-	CAATTCCTTCCGGAGGATTCAGTGTTAATTcattcaacagcaatgcgaggatggacggcc	CT-AC	SUMO3->UBE2G2	->1
FUS_1639897230_1639902849(++)	16	2	16	++	21	46221199	21	46226818	UBE2G2	NM_182688_chr21	2	-	SUMO3	NM_006936_chr21	4	-	AATTCCTTCCGGAGGATTCAGTGTTAATTCattcaacagcaatgcgaggatggacggccc	TT-CC	SUMO3->UBE2G2	->
FUS_1639897231_1639902683(++)	5	1	4	++	21	46221200	21	46226652	UBE2G2	NM_182688_chr21	2	-	SUMO3	NM_006936_chr21	4	-	ATTCCTTCCGGAGGATTCAGTGTTAATTCTgaacaaagataacaattctgattggcccaa	TT-CT	SUMO3->UBE2G2	->
FUS_1659972038_2261356150(+-)	3	1	2	+-	22	18166087	5	179068855	BCL2L13	NM_015367_chr22	3	+	C5orf60	NM_001142306_chr5	6	-	TAAAATCTCTGGACAAAGAAATTTCTGAAGgctggagtgcagtggcaccatcttggctca	GT-AG	BCL2L13->C5orf60	0->
FUS_1660368729_1660399584(++)	4	1	3	++	22	18562778	22	18593633	PEX26	NM_001127649_chr22,NM_001199319_chr22,NM_017929_chr22	2,3,3	+++	TUBA8	NM_018943_chr22	1	+	GAAAAGCTACCCCCCAAAGTCCTGGAGCTGtgcgggaatgcatatcagtccacgtgggcc	TG-GA	PEX26->TUBA8	2->1
FUS_1661204252_1661240852(++)	20	8	20	++	22	19398301	22	19434901	HIRA	NM_003325_chr22	2	-	C22orf39	NM_001166242_chr22,NM_173793_chr22	2,2	--	GGTGAATATCAACTGAAAAAATCGGCTTGCctgggcctcggcgttccggcgctcctccca	CT-AC	C22orf39->HIRA	2->1
FUS_1661224914_1661240853(++)	17	1	20	++	22	19418963	22	19434902	HIRA	NM_003325_chr22	1	-	C22orf39	NM_001166242_chr22,NM_173793_chr22	2,2	--	GTGAATATCAACTGAAAAAATCGGCTTGCCtgggcctcggcgttccggcgctcctcccag	AT-CC	C22orf39->HIRA	1->0
FUS_1662590792_1662602674(++)	10	1	11	++	22	20784841	22	20796723	SCARF2	NM_182895_chr22,NM_153334_chr22	6,6	--	KLHL22	NM_032775_chr22,NR_033825_chr22	7,6	--	CCGTAAGTGCCATTGCTACACTTGGTCTCGcacctggtgcacgtccctcctgtatccggc	CA-GC	KLHL22->SCARF2	2->2
FUS_1662590795_1662606681(++)	13	5	11	++	22	20784844	22	20800730	SCARF2	NM_182895_chr22,NM_153334_chr22	6,6	--	KLHL22	NM_032775_chr22,NR_033825_chr22	6,5	--	TAAGTGCCATTGCTACACTTGGTCTCGCACctggtgcacgtccctcctgtatccggcatc	CT-AC	KLHL22->SCARF2	2->2
FUS_1662590928_1662606682(++)	10	1	11	++	22	20784977	22	20800731	SCARF2	NM_182895_chr22,NM_153334_chr22	5,5	--	KLHL22	NM_032775_chr22,NR_033825_chr22	6,5	--	AAGTGCCATTGCTACACTTGGTCTCGCACCtggtgcacgtccctcctgtatccggcatcg	GG-CC	KLHL22->SCARF2	1->1
FUS_1666025306_1666042718(++)	6	1	5	++	22	24219355	22	24236767	SLC2A11	NM_001024938_chr22,NM_001024939_chr22,NM_030807_chr22	5,5,6	+++	MIF	NM_002415_chr22	1	+	GGGGATCGTGATGGGACAGGTGGTCGGACTcagtacatcgcggtgcacgtggtcccggac	CA-CC	SLC2A11->MIF	1->0
FUS_1666025309_1666042910(++)	10	9	5	++	22	24219358	22	24236959	SLC2A11	NM_001024938_chr22,NM_001024939_chr22,NM_030807_chr22	5,5,6	+++	MIF	NM_002415_chr22	2	+	GATCGTGATGGGACAGGTGGTCGGACTCAGtacatcgcggtgcacgtggtcccggaccag	GT-AG	SLC2A11->MIF	1->0
FUS_1666031007_1666042910(++)	16	5	11	++	22	24225056	22	24236959	SLC2A11	NM_001024938_chr22,NM_001024939_chr22,NM_030807_chr22	8,8,9	+++	MIF	NM_002415_chr22	2	+	AGCTGCGAGCTGCTCACGGCGGTTGTTAGTtacatcgcggtgcacgtggtcccggaccag	GT-AG	SLC2A11->MIF	2->0
FUS_1666031910_1666042911(++)	12	1	11	++	22	24225959	22	24236960	SLC2A11	NM_001024938_chr22,NM_001024939_chr22,NM_030807_chr22	9,9,10	+++	MIF	NM_002415_chr22	2	+	GCTGCGAGCTGCTCACGGCGGTTGTTAGTTacatcgcggtgcacgtggtcccggaccagc	GT-GT	SLC2A11->MIF	0->1
FUS_1666032567_1666042910(++)	13	2	15	++	22	24226616	22	24236959	SLC2A11	NM_001024938_chr22,NM_001024939_chr22,NM_030807_chr22	11,11,12	+++	MIF	NM_002415_chr22	2	+	CTGGTCGGCCTGGGATTTCCCTTTATCATGtacatcgcggtgcacgtggtcccggaccag	GT-AG	SLC2A11->MIF	2->0
FUS_1666571238_1666635655(++)	27	1	45	++	22	24765287	22	24829704	SPECC1L	NM_001145468_chr22,NM_015330_chr22	13,14	++	ADORA2A	NM_000675_chr22	2	+	GTGGTGTCAGAAGAAAACAGAAGGCTATCAggtacaatggcttggtgaccggcacgaggg	GG-CC	SPECC1L->ADORA2A	1->1
FUS_1666571239_1666642502(++)	44	53	45	++	22	24765288	22	24836551	SPECC1L	NM_001145468_chr22,NM_015330_chr22	13,14	++	ADORA2A	NM_000675_chr22	3	+	TGGTGTCAGAAGAAAACAGAAGGCTATCAGgtacaatggcttggtgaccggcacgagggc	GT-AG	SPECC1L->ADORA2A	2->2
FUS_1672489500_1672494713(++)	3	1	2	++	22	30683549	22	30688762	GATSL3	NM_001037666_chr22	3	-	TBC1D10A	NM_031937_chr22	9	-	CTACTTGCAGGAACTCAGATGGGGGCAGCTcccgggtctcctgccagcgccgcagctgaa	CT-AC	TBC1D10A->GATSL3	0->1
FUS_1672489500_1672495591(++)	9	4	5	++	22	30683549	22	30689640	GATSL3	NM_001037666_chr22	3	-	TBC1D10A	NM_031937_chr22	8	-	CTACTTGCAGGAACTCAGATGGGGGCAGCTctcctggaccagaaaggcctcctgcatgat	CT-AC	TBC1D10A->GATSL3	2->1
FUS_1672490647_1672495593(++)	6	1	5	++	22	30684696	22	30689642	GATSL3	NM_001037666_chr22	2	-	TBC1D10A	NM_031937_chr22	8	-	ACTTGCAGGAACTCAGATGGGGGCAGCTCTcctggaccagaaaggcctcctgcatgatct	TT-CT	TBC1D10A->GATSL3	0->2
FUS_1672612619_1672630400(++)	14	6	11	++	22	30806668	22	30824449	SEC14L2	NM_012429_chr22,NM_033382_chr22	8,8	++	MTFP1	NM_016498_chr22,NM_001003704_chr22	4,3	++	ACACTCGTAAGAAGATCATGGTCCTGGGAGgtcggtggatttcctcctggactccagcct	GT-AG	SEC14L2->MTFP1	0->02
FUS_1672618343_1672628656(++)	6	2	4	++	22	30812392	22	30822705	SEC14L2	NM_012429_chr22,NM_033382_chr22	11,11	++	MTFP1	NM_016498_chr22,NM_001003704_chr22	2,2	++	GGACCCTCACCTGCAGTGATCCTGGCATCTgctatgccaatgaggtgggcgaggctttcc	GT-AG	SEC14L2->MTFP1	0->1
FUS_1672618343_1672630400(++)	11	4	9	++	22	30812392	22	30824449	SEC14L2	NM_012429_chr22,NM_033382_chr22	11,11	++	MTFP1	NM_016498_chr22,NM_001003704_chr22	4,3	++	GGACCCTCACCTGCAGTGATCCTGGCATCTgtcggtggatttcctcctggactccagcct	GT-AG	SEC14L2->MTFP1	0->02
FUS_1680090384_3051756110(-+)	11	3	10	-+	22	38284433	Y	15435151	EIF3L	NM_016091_chr22	13	+	UTY	NM_182660_chrY	20	-	CTGTCCCATCTTCTTCAGGGTTCGATTAAGctgtaattccagctattcgggaggctgagg	CT-GC	UTY->EIF3L	1->0
FUS_1680889271_2305298969(++)	1	1	0	++	22	39083320	6	42096410	JOSD1	NM_014876_chr22	4	-	C6orf132	NM_001164446_chr6	2	-	CCAGCCTGGGCAACAAGAGTGAAACTCAGTcagcggaaggaaggtcagcaggggccggac	CT-AC	C6orf132->JOSD1	2->
FUS_1680934930_2458046522(++)	1	1	0	++	22	39128979	7	23728891	GTPBP1	NM_004286_chr22	12	+	C7orf46	NM_001127365_chr7,NM_199136_chr7,NM_001127364_chr7	2,3,3	+++	CAGCCTCCCAAAGTGCTGGGATTACAGGTAtaaacaacataaaactgacttggaagcgat	TG-TA	GTPBP1->C7orf46	->2
FUS_1681223190_2564161581(+-)	8	1	7	+-	22	39417239	7	129843950	APOBEC3D	NM_152426_chr22	1	+	TMEM209	NM_032842_chr7	2	-	TCAAGTGATTCTCCTGCCTCAGCCTCCAGAatgcagggggaggcacaccctagtgcttcc	GT-AG	APOBEC3D->TMEM209	->0
FUS_1681618755_1681719501(++)	28	18	20	++	22	39812804	22	39913550	TAB1	NM_006116_chr22,NM_153497_chr22	4,4	++	SMCR7L	NM_019008_chr22	6	+	GTGCGGCGTGTGCTGCTGCAGGCCTTCGATgccccgaggtgggagggttctgtaaataca	GT-AG	TAB1->SMCR7L	2->
FUS_1681618755_1681719509(++)	17	15	13	++	22	39812804	22	39913558	TAB1	NM_006116_chr22,NM_153497_chr22	4,4	++	SMCR7L	NM_019008_chr22	6	+	GTGCGGCGTGTGCTGCTGCAGGCCTTCGATgtgggagggttctgtaaatacagactactg	GT-AG	TAB1->SMCR7L	2->
FUS_1683128416_1683153430(++)	11	1	10	++	22	41322465	22	41347479	XPNPEP3	NM_022098_chr22	10	+	RBX1	NM_014248_chr22	1	+	TTGACCTTCACTGCGGCCCACATGCACCTCagtggaatgcagtagccctctgggcctggg	AG-AA	XPNPEP3->RBX1	->1
FUS_1683128418_1683155510(++)	13	3	10	++	22	41322467	22	41349559	XPNPEP3	NM_022098_chr22	10	+	RBX1	NM_014248_chr22	2	+	GACCTTCACTGCGGCCCACATGCACCTCAGtggaatgcagtagccctctgggcctgggat	GT-AG	XPNPEP3->RBX1	->0
FUS_1683128418_1683169754(++)	18	9	13	++	22	41322467	22	41363803	XPNPEP3	NM_022098_chr22	10	+	RBX1	NM_014248_chr22	4	+	GACCTTCACTGCGGCCCACATGCACCTCAGcatgcttttcacttccactgcatctctcgc	GT-AG	XPNPEP3->RBX1	->0
FUS_1683128418_1683169802(++)	24	20	12	++	22	41322467	22	41363851	XPNPEP3	NM_022098_chr22	10	+	RBX1	NM_014248_chr22	4	+	GACCTTCACTGCGGCCCACATGCACCTCAGgtgtgtccattggacaacagagagtgggaa	GT-AG	XPNPEP3->RBX1	->0
FUS_1683128418_1683174431(++)	25	13	19	++	22	41322467	22	41368480	XPNPEP3	NM_022098_chr22	10	+	RBX1	NM_014248_chr22	5	+	GACCTTCACTGCGGCCCACATGCACCTCAGgtatgggcactaggaaaagacttcttccat	GT-AG	XPNPEP3->RBX1	->2
FUS_1686936993_1686988288(++)	13	6	7	++	22	45131042	22	45182337	PRR5	NM_015366_chr22,NM_001017529_chr22,NM_001017528_chr22,NM_001017530_chr22,NM_001198721_chr22,NM_181333_chr22	8,7,8,7,9,7	++++++	PRR5-ARHGAP8,ARHGAP8,ARHGAP8,ARHGAP8	NM_181334_chr22,NM_001198726_chr22,NM_001017526_chr22,NM_181335_chr22	5,2,2,2	++++	AGGGGCCCTTCACCCATTCCTGCATCCTGGagctgcagagagacaaggcggcggcggctg	GT-AG	PRR5->PRR5-ARHGAP8,ARHGAP8,ARHGAP8,ARHGAP8	0->1
FUS_1687016505_3000804304(--)	3	1	2	--	22	45210554	X	119753937	PRR5-ARHGAP8,ARHGAP8,ARHGAP8,ARHGAP8	NM_181334_chr22,NM_001198726_chr22,NM_001017526_chr22,NM_181335_chr22	8,5,6,5	++++	MCTS1	NM_014060_chrX,NM_001137554_chrX	6,6	++	CCACGTAGAGGGCCTTCAAGTTCTTCTTGTaccttggcctcccaaagtactgggattaca	AC-CC	MCTS1->PRR5-ARHGAP8,ARHGAP8,ARHGAP8,ARHGAP8	->1
FUS_1688887150_1740663243(--)	3	1	2	--	22	47081199	3	47552716	CERK	NM_022766_chr22	13	-	C3orf75	NM_001031703_chr3	2	-	TGGGAGGCCGAGGCGGGTGGATCACCTAAGgggaaactgactctactctgtgatgccaag	GT-AG	CERK->C3orf75	->0
FUS_1691857004_2533693334(--)	2	234	0	--	22	50051053	7	99375703	C22orf34	NR_026997_chr22	1	-	CYP3A4	NM_017460_chr7	3	-	AGCCACGCTTCCTGTACAGCCTGCAGAACTggcttttgtatgtttgacatggaatgtcat	GT-AG	C22orf34->CYP3A4	->0
FUS_1696281396_2774037134(--)	11	1	11	--	3	3170869	9	34216783	TRNT1	NM_182916_chr3	2	+	UBAP1	NR_033243_chr9	2	+	TTCGTGATTCTCTTTGACAAATAATTCTGTagtcccagctacttgggaggctgaggtggg	CA-GT	UBAP1->TRNT1	->0
FUS_1696281399_1893974308(++)	1	1	0	++	3	3170872	4	2841317	TRNT1	NM_182916_chr3	2	+	SH3BP2	NM_001145856_chr4,NM_001145855_chr4,NM_001122681_chr4,NM_003023_chr4	13,13,13,13	++++	TTTTCACAGAAGGACTGAAGAGTCTGACAGacaaggtcttgctctgtcacccaggctgga	GT-AG	TRNT1->SH3BP2	0->
FUS_1696289471_2774037138(--)	12	3	11	--	3	3178944	9	34216787	TRNT1	NM_182916_chr3	3	+	UBAP1	NR_033243_chr9	2	+	TTAATTCGTGATTCTCTTTGACAAATAATTctgtagtcccagctacttgggaggctgagg	CT-AC	UBAP1->TRNT1	->1
FUS_1696289473_2951150325(-+)	8	1	8	-+	3	3178946	X	70099958	TRNT1	NM_182916_chr3	3	+	TEX11	NM_001003811_chrX,NM_031276_chrX	4,3	--	TCTTAATTCGTGATTCTCTTTGACAAATAAttctgtagtcccagctacttgggaggctga	TT-AC	TEX11->TRNT1	2->0
FUS_1702956224_1702962832(++)	29	16	31	++	3	9845697	3	9852305	ARPC4	NM_001024959_chr3,NM_001024960_chr3,NM_005718_chr3,NM_001198780_chr3	5,5,5,5	++++	TTLL3	NM_001025930_chr3,NR_037162_chr3	2,1	++	CGCATTGTGGCTGAAGAGTTCCTTAAGAATgtttcccggtcctctggcgaggatcctcca	GT-AG	ARPC4->TTLL3	2->1
FUS_1708421911_2680622412(+-)	4	2	3	+-	3	15311384	8	87166093	SH3BP5	NM_001018009_chr3,NM_004844_chr3	4,4	--	ATP6V0D2	NM_152565_chr8	8	+	CTGCGTGGCTTTCTGAGCTTCCAGCTGAGCctgggaggtggaggttgcagtgagccgaga	CT-AT	ATP6V0D2->SH3BP5	->0
FUS_1708456137_2680622411(+-)	5	2	3	+-	3	15345610	8	87166092	SH3BP5	NM_001018009_chr3,NM_004844_chr3	3,3	--	ATP6V0D2	NM_152565_chr8	8	+	TGCGTGGCTTTCTGAGCTTCCAGCTGAGCCtgggaggtggaggttgcagtgagccgagat	TG-TC	ATP6V0D2->SH3BP5	->2
FUS_1725280095_1835014080(-+)	6	1	5	-+	3	32169568	3	141903553	GPD1L	NM_015141_chr3	2	+	GK5	NR_033289_chr3	10	-	TTACCAATTATTTTTGCAACAGCTGAACCCctatagtcctagctactcaggaggctgagg	CT-AC	GK5->GPD1L	->2
FUS_1733638824_2287586036(-+)	2	1	2	-+	3	40528297	6	24383477	ZNF619	NM_001145083_chr3,NM_001145082_chr3,NM_001145093_chr3,NR_026746_chr3	4,6,5,6	++++	DCDC2	NM_001195610_chr6	1	-	TTTCCTCATTCTCAGTCTTGGTTTTACCACctggaaggcagaggttgcggtgagccaaga	CT-AC	DCDC2->ZNF619	->1
FUS_1735910370_1735938047(++)	11	5	7	++	3	42799843	3	42827520	CCDC13	NM_144719_chr3	2	-	HIGD1A	NM_001099668_chr3,NM_001099669_chr3,NM_014056_chr3	3,3,3	---	CTGTGAGCTTTCATCTGCTGCCATCCTGCCcaacagtcattgctcctacaacaaagcctt	CT-AC	HIGD1A->CCDC13	0->
FUS_1735971729_1736060167(++)	13	1	14	++	3	42861202	3	42949640	CCBP2	NM_001296_chr3	2	+	ZNF662	NM_207404_chr3,NM_001134656_chr3	2,2	++	TTACTCAAGGCTGCCTCTCTGCAAAGTTGAgcagcatttccatttcccaaaccggctctg	GG-TG	CCBP2->ZNF662	->0
FUS_1735971730_1736060812(++)	16	8	14	++	3	42861203	3	42950285	CCBP2	NM_001296_chr3	2	+	ZNF662	NM_207404_chr3	3	+	TACTCAAGGCTGCCTCTCTGCAAAGTTGAGcagcatttccatttcccaaaccggctctga	GT-AG	CCBP2->ZNF662	->1
FUS_1736016485_1736060813(++)	13	1	14	++	3	42905958	3	42950286	CCBP2	NM_001296_chr3	3	+	ZNF662	NM_207404_chr3	3	+	ACTCAAGGCTGCCTCTCTGCAAAGTTGAGCagcatttccatttcccaaaccggctctgat	AC-GC	CCBP2->ZNF662	->2
FUS_1737610263_2828514607(--)	12	1	13	--	3	44499736	9	88694256	ZNF445	NM_181489_chr3	2	-	GOLM1	NM_016548_chr9,NM_177937_chr9	2,2	--	CCTCAGCCTCCCGAGTAGCTGGGACTACAGattctcagcgctgattttgagatgatgggc	GT-AG	ZNF445->GOLM1	->
FUS_1741126183_2636502936(-+)	3	3	0	-+	3	48015656	8	43046617	MAP4	NM_030885_chr3	4	-	HGSNAT	NM_152419_chr8	12	+	CCTTGGCCACCCAAAGTGCTGGGATTACAGgagaggagctgcctttctcttcgagacatc	GT-AG	MAP4->HGSNAT	->0
FUS_1741446215_2584867275(+-)	6	2	4	+-	3	48335688	7	150549644	NME6	NM_005793_chr3	6	-	ABP1	NM_001091_chr7	1	+	GGTTCAAGCAATTCTCCTGCCTCAGCCTCTgtgtgctctgctcccagttcgctctgcttc	GA-CT	ABP1->NME6	->
FUS_1741843376_2305790159(+-)	1	1	0	+-	3	48732849	6	42587600	IP6K2	NR_027438_chr3,NM_001146179_chr3,NM_001005911_chr3,NM_001005909_chr3,NM_001146178_chr3,NR_027437_chr3,NM_016291_chr3,NM_001005910_chr3,NM_001190317_chr3,NM_001190316_chr3	2,2,2,2,2,2,2,2,3,3	----------	UBR2	NM_001184801_chr6	12	+	TTGGCTCCTTGGCTTGTTCTGGCCAGGATGatctgtggtcccagctacttgggaggctga	CT-GC	UBR2->IP6K2	->1
FUS_1741843378_1968835414(+-)	8	8	4	+-	3	48732851	4	77702423	IP6K2	NR_027438_chr3,NM_001146179_chr3,NM_001005911_chr3,NM_001005909_chr3,NM_001146178_chr3,NR_027437_chr3,NM_016291_chr3,NM_001005910_chr3,NM_001190317_chr3,NM_001190316_chr3	2,2,2,2,2,2,2,2,3,3	----------	SHROOM3	NM_020859_chr4	11	+	GGCTCCTTGGCTTGTTCTGGCCAGGATGCTctgtggtcccagctacttgggaggctgaga	CT-AC	SHROOM3->IP6K2	->2
FUS_1741865119_1968835411(+-)	10	1	11	+-	3	48754592	4	77702420	IP6K2	NR_027438_chr3,NM_001146178_chr3,NM_001146179_chr3,NM_001190316_chr3,NM_001190317_chr3,NM_001005911_chr3,NR_027437_chr3,NM_001005909_chr3,NM_016291_chr3,NM_001005910_chr3	1,1,1,1,1,1,1,1,1,1	----------	SHROOM3	NM_020859_chr4	11	+	TTGGCTTGTTCTGGCCAGGATGCTCTGCTGtggtcccagctacttgggaggctgagatgg	CC-TG	SHROOM3->IP6K2	->
FUS_1742346506_2109325866(-+)	11	3	10	-+	3	49235979	5	27038571	CCDC36	NM_178173_chr3	2	+	CDH9	NM_016279_chr5	1	-	ACACTCCAGCCTGGGCGACAGAATGAGACCttgcttaacaatggaactgagtttagccct	CT-CC	CDH9->CCDC36	->
FUS_1742346508_2109275784(-+)	11	2	10	-+	3	49235981	5	26988489	CCDC36	NM_178173_chr3	2	+	CDH9	NM_016279_chr5	2	-	CTACACTCCAGCCTGGGCGACAGAATGAGAccttgcttaacaatggaactgagtttagcc	CC-TT	CDH9->CCDC36	->
FUS_1742418343_1747784347(--)	4	4	0	--	3	49307816	3	54673820	C3orf62	NM_198562_chr3	3	-	ESRG	NR_027122_chr3	1	-	GCACTCCAGCATGAGTGACAGAGTGAGACCacaaagcctgtttggtggtctcttcacacg	CT-AC	C3orf62->ESRG	->
FUS_1742640783_2622277648(++)	5	1	5	++	3	49530256	8	28821329	DAG1	NM_001165928_chr3,NM_001177638_chr3	4,2	++	HMBOX1	NM_024567_chr8,NM_001135726_chr8	3,2	++	CTCAGCTTCCTGAGTAGCTGGGATTACAGAatggtagataacgcagatcatctctggaaa	TA-GA	DAG1->HMBOX1	->
FUS_1744807419_1744818814(++)	13	1	14	++	3	51696892	3	51708287	RAD54L2	NM_015106_chr3	22	+	TEX264	NM_001129884_chr3,NM_015926_chr3	3,2	++	GCCAGCCCCCGTGCAGCCGTATGAACACGGctgccttgaggtgcagtgttggggatccag	GT-AG	RAD54L2->TEX264	1->
FUS_1745106631_1745118508(++)	8	6	4	++	3	51996104	3	52007981	PCBP4	NM_001174100_chr3	2	-	ABHD14B	NM_001146314_chr3,NM_032750_chr3,NR_027476_chr3	1,1,1	---	CCAATCTCTCTTCTATGTGCTGGAAATGGCctggggagctgcgtggactcgcgcagacgg	CT-AC	ABHD14B->PCBP4	->
FUS_1745111870_1745118510(++)	5	1	4	++	3	52001343	3	52007983	PCBP4	NM_001174100_chr3,NM_033008_chr3,NM_020418_chr3	1,1,1	---	ABHD14B	NM_001146314_chr3,NM_032750_chr3,NR_027476_chr3	1,1,1	---	AATCTCTCTTCTATGTGCTGGAAATGGCCTggggagctgcgtggactcgcgcagacggga	CG-CT	ABHD14B->PCBP4	->
FUS_1745368855_1745374204(++)	2	2	0	++	3	52258328	3	52263677	TLR9	NM_017442_chr3	2	-	TWF2	NM_007284_chr3	8	-	CAGCGGGTGCAGGGCGCTGCGGCAGAAACCtttcttggcgatctccagatggaagtcctg	CT-AC	TWF2->TLR9	2->0
FUS_1745979546_1745985043(++)	22	9	15	++	3	52869019	3	52874516	MUSTN1	NM_205853_chr3	1	-	TMEM110-MUSTN1,TMEM110	NM_001198974_chr3,NM_198563_chr3	8,8	--	CTCTGAAGGCGCCTCTCTGGCAGGCAGCAGgggtagcccaaagcggtgcttctttttctt	CT-AC	TMEM110-MUSTN1,TMEM110->MUSTN1	2->
FUS_1746233668_2262955787(++)	5	2	3	++	3	53123141	5	180668492	RFT1	NM_052859_chr3	13	-	GNB2L1	NM_006098_chr5	3	-	CTGCACTCCAGCCTGGGCGACAGAGTGAGActggacagtgtatttgcacacacccagggt	CT-AC	GNB2L1->RFT1	2->
FUS_1747784159_2726546537(--)	4	1	3	--	3	54673632	8	133090218	ESRG	NR_027122_chr3	1	-	HHLA1	NM_001145095_chr8	11	-	CCAAGAAACATCTCACCAATTTCAAATCCGctaccaggagggtggccagaactcagtggt	GT-AG	ESRG->HHLA1	->1
FUS_1750417341_2258801329(--)	8	3	5	--	3	57306814	5	176514034	APPL1	NM_012096_chr3	22	+	FGFR4	NM_002011_chr5,NM_213647_chr5	1,1	++	CATCCTGGCTAACACGGTGAAACCCCGTCTctggctcctcctcacctggctcctccgccg	CT-AC	FGFR4->APPL1	->
FUS_1766127397_1766157755(++)	12	2	11	++	3	73016870	3	73047228	GXYLT2	NM_001080393_chr3	6	+	PPP4R2	NM_174907_chr3	2	+	TTCAGAGCACTCTATGAAGCAATACGGGATattttgagaagagggggaaaaaggaagttt	GT-AG	GXYLT2->PPP4R2	2->1
FUS_1794653840_2275218460(--)	1	1	0	--	3	101543313	6	12015901	FAM55C	NM_145037_chr3,NM_001134456_chr3	8,8	++	HIVEP1	NM_002114_chr6	2	+	GCACTCCAGCCTGGGCAAAAGAGCAAGACCctcttagatttctgggatgaatttgtttag	CT-AC	HIVEP1->FAM55C	0->
FUS_1794653960_1943890921(++)	9	2	7	++	3	101543433	4	52757930	FAM55C	NM_145037_chr3,NM_001134456_chr3	8,8	++	DCUN1D4	NM_015115_chr4,NM_001040402_chr4	7,7	++	AGCCTCCTGAGTAGCTGGGACTACAGGTATttatgcttgtcctagcttggaaattggatg	GT-AG	FAM55C->DCUN1D4	->1
FUS_1802012464_1886192596(+-)	7	3	7	+-	3	108901937	3	193082069	C3orf66	NR_026767_chr3	3	+	ATP13A5	NM_198505_chr3	2	-	TCTCGGCTCACTGCAACGTCTGCCTCCCAGgaggtgtttggttaccgggaccacaatgta	GT-AG	C3orf66->ATP13A5	->0
FUS_1806917050_1943842424(--)	1	1	0	--	3	113806523	4	52709433	QTRTD1	NM_024638_chr3	10	+	DCUN1D4	NM_015115_chr4,NM_001040402_chr4	1,1	++	CAGATGCCAGTACCATGCTTCCTGTAAAGCtgacagcggcggcatccgagtgcattttca	CT-AC	DCUN1D4->QTRTD1	0->
FUS_1811976960_1812016184(++)	22	2	32	++	3	118866433	3	118905657	C3orf30	NM_152539_chr3	1	+	UPK1B	NM_006952_chr3	2	+	AGAAAAAACTCAAGCCATAGTAACCAAATCttgttgcggcattgccctgactgcggagtg	TG-GG	C3orf30->UPK1B	1->2
FUS_1811976961_1812017149(++)	23	3	32	++	3	118866434	3	118906622	C3orf30	NM_152539_chr3	1	+	UPK1B	NM_006952_chr3	3	+	GAAAAAACTCAAGCCATAGTAACCAAATCTtgttgcggcattgccctgactgcggagtgc	GT-AG	C3orf30->UPK1B	2->0
FUS_1812489434_1812499037(++)	15	1	15	++	3	119378907	3	119388510	POPDC2	NM_022135_chr3	1	-	COX17	NM_005694_chr3	3	-	GTGAACAATCTCCTTGTATGTCTGTAGGGGcaccatttcatattttaaatcctagggctc	CA-AC	COX17->POPDC2	->0
FUS_1812489437_1812504519(++)	16	3	15	++	3	119378910	3	119393992	POPDC2	NM_022135_chr3	1	-	COX17	NM_005694_chr3	2	-	AACAATCTCCTTGTATGTCTGTAGGGGCACcatttcatattttaaatcctagggctctca	CT-AC	COX17->POPDC2	->0
FUS_1815990829_1816038573(++)	16	3	15	++	3	122880302	3	122928046	PDIA5	NM_006810_chr3,NR_028444_chr3	16,15	++	SEC22A	NM_012430_chr3	2	+	TTCGCAGAAAAGTATGACAGCGACCGCACAgtcttctctgttggttgaaatgtctatgat	GT-AG	PDIA5->SEC22A	2->
FUS_1815991254_1816038574(++)	15	2	15	++	3	122880727	3	122928047	PDIA5	NM_006810_chr3,NR_028444_chr3	17,16	++	SEC22A	NM_012430_chr3	2	+	TCGCAGAAAAGTATGACAGCGACCGCACAGtcttctctgttggttgaaatgtctatgatt	AA-GG	PDIA5->SEC22A	0->
FUS_1818019892_1818107097(++)	3	2	1	++	3	124909365	3	124996570	SLC12A8	NM_024628_chr3,NM_001195483_chr3	3,2	--	ZNF148	NM_021964_chr3	7	-	CCACCAGGGCTGGGGCTGGGCCAGGGCATCcagtatgaatcttctcatgtctctgaagca	CT-AC	ZNF148->SLC12A8	0->0
FUS_1821404756_1997783647(+-)	3	2	1	+-	3	128294229	4	106650656	C3orf27	NM_007354_chr3	2	-	GSTCD	NM_024751_chr4,NM_001031720_chr4	5,5	++	TCCAGCCTGGGTGACAGAGCAAGACTCCATcttcctttgggctgactgctgcagggagaa	CT-AC	GSTCD->C3orf27	0->
FUS_1829089850_3058204155(-+)	4	1	4	-+	3	135979323	Y	21883196	PCCB	NM_001178014_chr3,NM_000532_chr3	5,4	++	KDM5D	NM_001146705_chrY,NM_001146706_chrY,NM_004653_chrY	13,11,12	---	CCTGACAGACTGCCTCCAAAAACTGTAAAAtcctgtaatcccaacactttgggaggccaa	TC-AC	KDM5D->PCCB	1->2
FUS_1848630907_2466843036(++)	8	5	4	++	3	155520380	7	32525405	C3orf33	NM_173657_chr3	3	-	LSM5	NM_001130710_chr7,NM_001139499_chr7,NM_012322_chr7,NR_024466_chr7	5,5,5,5	----	TCCAGCTATGGCCATTCCAGTGCTGATGTTctgtaatcccagctactcaggagggtgagg	CT-AC	LSM5->C3orf33	->
FUS_1848633914_2466843038(++)	4	1	4	++	3	155523387	7	32525407	C3orf33	NM_173657_chr3	2	-	LSM5	NM_001130710_chr7,NM_001139499_chr7,NM_012322_chr7,NR_024466_chr7	5,5,5,5	----	CAGCTATGGCCATTCCAGTGCTGATGTTCTgtaatcccagctactcaggagggtgaggca	GT-CT	LSM5->C3orf33	->
FUS_1853194467_1853266547(++)	6	4	2	++	3	160083940	3	160156020	IFT80	NM_001190242_chr3,NM_001190241_chr3,NM_020800_chr3	5,7,6	---	TRIM59	NM_173084_chr3	3	-	GGCCCCACGCTACTGAATACACTGGTGTTCcaggccaggaacatgacatcctttttggag	CT-AC	TRIM59->IFT80	0->1
FUS_1862917985_2855842939(+-)	6	1	5	+-	3	169807458	9	116022588	PHC3	NM_024947_chr3	15	-	SLC31A1	NM_001859_chr9	5	+	GTGTGGTGGCTCATGCCTGTAATCCCAGCAtgtttgcaggaggtgaggaaagctcagcat	CT-AC	SLC31A1->PHC3	2->
FUS_1869926856_1968835414(+-)	1	2	0	+-	3	176816329	4	77702423	TBL1XR1	NM_024665_chr3	2	-	SHROOM3	NM_020859_chr4	11	+	ACCGCCAATCACAAGTTGCTGTTGTTGATGctgtggtcccagctacttgggaggctgaga	CT-AC	SHROOM3->TBL1XR1	->
FUS_1873812253_2529751664(-+)	1	2	0	-+	3	180701726	7	95434033	DNAJC19	NM_145261_chr3,NR_033723_chr3,NR_033721_chr3,NR_033722_chr3,NM_001190233_chr3	6,6,5,5,6	-----	DYNC1I1	NM_001135556_chr7,NM_001135557_chr7,NM_004411_chr7	2,2,2	+++	CCTCAGCCTCCCAAAGTACTGGGATTACAGgaaaccaacatgtctgacaaaagtgactta	GC-AG	DNAJC19->DYNC1I1	->
FUS_1876319561_2934300388(++)	6	2	5	++	3	183209034	X	53250021	KLHL6	NM_130446_chr3	7	-	KDM5C	NM_004187_chrX	2	-	CTCCTGCCTCAGCCTCCTGAGTAGCTGGAActctagctcattcagcctctggattcgggg	TT-AC	KDM5C->KLHL6	2->
FUS_1877654480_2305790159(--)	9	3	8	--	3	184543953	6	42587600	VPS8	NM_015303_chr3,NM_001009921_chr3	3,3	++	UBR2	NM_001184801_chr6	12	+	ACTTGAGGAATATCAAACTCCTTGTCATCAatctgtggtcccagctacttgggaggctga	AT-GC	UBR2->VPS8	->2
FUS_1889107939_1889144341(++)	21	5	23	++	3	195997412	3	196033814	PCYT1A	NM_005017_chr3	3	-	TCTEX1D2	NM_152773_chr3	3	-	GCTGAACACTGTGCATCCATCTTCTTTTAAaatactccttcacctctttgttctccaatc	CT-AC	TCTEX1D2->PCYT1A	1->
FUS_1889153629_1889161142(++)	15	5	12	++	3	196043102	3	196050615	TCTEX1D2	NM_152773_chr3	2	-	TM4SF19	NM_138461_chr3	5	-	ATACAGTCTTTAACCACAGAGGGCCTGAACccactccttgtagaaaggattcaagacagc	CT-AC	TM4SF19->TCTEX1D2	->2
FUS_1889155438_1889161143(++)	11	1	12	++	3	196044911	3	196050616	TCTEX1D2	NM_152773_chr3	1	-	TM4SF19	NM_138461_chr3	5	-	TACAGTCTTTAACCACAGAGGGCCTGAACCcactccttgtagaaaggattcaagacagcc	TC-CC	TM4SF19->TCTEX1D2	->1
FUS_1889492045_1889554256(++)	8	2	7	++	3	196381518	3	196443729	LRRC33	NM_198565_chr3	2	+	PIGX	NM_001166304_chr3,NM_017861_chr3	2,2	++	ACAGCAGCCTCCCAAGGAGTCTGCAAGTTGgcataagggccatgtgttctgaaattattt	GT-AG	LRRC33->PIGX	2->1
FUS_1889668330_2125675747(-+)	16	6	16	-+	3	196557803	5	43388452	PAK2	NM_002577_chr3	15	+	CCL28	NM_148672_chr5	2	-	TGAGCTGAGATCATGTCACTGCACTCCAGCatgacagcagccaagtcacaatccccatca	CT-AC	CCL28->PAK2	1->
FUS_1891220620_2490419286(-+)	13	4	12	-+	4	87629	7	56101655	ZNF595	NM_182524_chr4	4	+	PSPH	NM_004577_chr7	2	-	CCAGCCTGGGCGACAGAACGAGACTCTGTCctgtgtcctgggcctccggggctcctgcgg	TC-CC	PSPH->ZNF595	->
FUS_1892306320_1892328048(++)	16	10	11	++	4	1173329	4	1195057	SPON2,LOC100130872-SPON2	NM_001199021_chr4,NR_033182_chr4	2,2	--	LOC100130872	NR_024569_chr4	3	-	ATTCTCATCTTCCTCCAAGCAGTGAGGAAActgccctgagtgtcccggccgtgagtcccc	CT-AC	LOC100130872->SPON2,LOC100130872-SPON2	->
FUS_1893597323_1893625055(++)	20	8	14	++	4	2464332	4	2492064	LOC402160	NM_001193282_chr4	15	+	RNF4	NM_002938_chr4,NM_001185009_chr4,NM_001185010_chr4	2,3,2	+++	GCGCCGCGGACCGCGCGCCCCAAGCCCCGGgacttgaaaatactggaaatctgtccggat	GT-AG	LOC402160->RNF4	2->
FUS_1893597528_1893625056(++)	13	1	14	++	4	2464537	4	2492065	LOC402160	NM_001193282_chr4	16	+	RNF4	NM_002938_chr4,NM_001185009_chr4,NM_001185010_chr4	2,3,2	+++	CGCCGCGGACCGCGCGCCCCAAGCCCCGGGacttgaaaatactggaaatctgtccggatc	CG-GG	LOC402160->RNF4	0->
FUS_1899717362_1899734171(++)	3	1	2	++	4	8584371	4	8601180	GPR78	NM_080819_chr4	2	+	CPZ	NM_001014447_chr4,NM_001014448_chr4	2,2	++	CATCTGCTTTGCCCCGTATGTCATGACCAGgtgaatgccacaggccaccagctgcagaca	GT-AG	GPR78->CPZ	1->1
FUS_1944020689_1994965685(--)	7	1	7	--	4	52887698	4	103832694	SGCB	NM_000232_chr4	6	-	NHEDC1	NM_001100874_chr4,NM_139173_chr4	8,8	--	CCTCAGCCTCCCGAGTACCTGGGACTACAGgtggtatacttaataacgccatagcctcta	GC-AG	SGCB->NHEDC1	->1
FUS_1944591990_1972085768(++)	1	1	0	++	4	53458999	4	80952777	USP46	NM_001134223_chr4,NM_022832_chr4	9,9	--	ANTXR2	NM_058172_chr4,NM_001145794_chr4	10,10	--	ACTCCAGCCTGGGTGACAGTGAGACTCCATtctccagctttattcaggataggtgcagga	CT-AC	ANTXR2->USP46	1->
FUS_1968325912_1968363288(++)	4	1	4	++	4	77192921	4	77230297	FAM47E	NM_001136570_chr4	5	+	STBD1	NM_003943_chr4	2	+	GGCTATGAGAGGAAACTCCAGAAACCACAGagcatcttcaagaaagcaatggacatttga	GT-AG	FAM47E->STBD1	2->1
FUS_1974945232_1974952134(++)	34	20	42	++	4	83812241	4	83819143	SEC31A	NM_016211_chr4,NM_001077207_chr4,NM_001191049_chr4,NM_001077208_chr4,NM_001077206_chr4,NM_014933_chr4	1,1,1,1,1,1	------	LOC100499177	NR_034075_chr4,NR_034076_chr4	4,3	--	TACGATCTACTTCCTTTAACTTCATCCTGCttccctgcatattttgagtaattatcttcc	TG-CC	LOC100499177->SEC31A	->0
FUS_1995121740_1995136229(++)	20	9	19	++	4	103988749	4	104003238	NHEDC2	NM_178833_chr4	2	-	BDH2	NM_020139_chr4	9	-	AGAAGATGACACAGGGAAGAGGAACGAGATttcatcagaagccaaatacacgcagagcat	CT-AC	BDH2->NHEDC2	2->
FUS_2000711789_2830970998(++)	8	4	5	++	4	109578798	9	91150647	OSTC	NM_021227_chr4	3	+	NXNL2	NM_001161625_chr9,NM_145283_chr9	1,1	++	TTCATGGCTAGAGTATTCATGAGAATGAAAcggcaacggagtctcgctctgttgcccagg	CT-AC	OSTC->NXNL2	2->0
FUS_2010311428_2533770846(++)	9	3	6	++	4	119178437	7	99453215	NDST3	NM_004784_chr4	14	+	CYP3A43	NM_022820_chr7,NM_057095_chr7,NM_057096_chr7	8,8,8	+++	CTCAGCCTCCTGAGGAGCTGGGATTACAGCactctttccatttcttaccccagtttttga	CA-GC	NDST3->CYP3A43	->2
FUS_2010311428_2533772088(++)	19	7	18	++	4	119178437	7	99454457	NDST3	NM_004784_chr4	14	+	CYP3A43	NM_022820_chr7,NM_057095_chr7,NM_057096_chr7	9,9,9	+++	CTCAGCCTCCTGAGGAGCTGGGATTACAGCatcgagtagatttctttcaacagatgatcg	CA-GC	NDST3->CYP3A43	->1
FUS_2031329537_2031346675(++)	17	7	16	++	4	140196546	4	140213684	C4orf49	NM_032623_chr4	2	-	NDUFC1	NM_001184988_chr4,NM_001184989_chr4,NM_001184990_chr4,NM_001184986_chr4,NM_001184991_chr4,NM_002494_chr4,NM_001184987_chr4	5,5,4,5,4,4,4	-------	ATCTGTTAGATGACATCCGGCGCAGAGATGtacattagtgtttcaaaagtttattccagc	CT-AC	NDUFC1->C4orf49	->1
FUS_2061190762_2871016859(+-)	1	1	0	+-	4	170057771	9	131196508	SH3RF1	NM_020870_chr4	5	-	CERCAM	NM_016174_chr9	10	+	TTCTATCAGCTGCTTAGCAGCCGAGTTAAAatcaggtcccaagacagtttctctgcctcc	CT-AC	CERCAM->SH3RF1	1->0
FUS_2069786624_2178298538(++)	7	1	6	++	4	178653633	5	96011243	LOC285501	NR_028342_chr4	2	+	CAST	NM_001042440_chr5,NM_001190442_chr5	2,2	++	TTCCTGAGGCCTCCCCAGCCATGCAGAACTcatgtcagtgaaaaaaccagtgaatcgcct	GT-AG	LOC285501->CAST	->0
FUS_2078263417_2078286272(++)	8	5	3	++	4	187130426	4	187153281	CYP4V2	NM_207352_chr4	10	+	KLKB1	NM_000892_chr4	3	+	CCTTCTCTGCTGGCCCCAGGAACTGTATAGgatgtctgactcaactctatgaaaacgcct	GT-AG	CYP4V2->KLKB1	0->1
FUS_2078481243_2078609327(++)	7	3	4	++	4	187348252	4	187476336	LOC285441	NR_033901_chr4	4	-	MTNR1A	NM_005958_chr4	1	-	TTCCGCATCCAGTGTCTTCATGTTGGCAGCctgcgttcctgagcttcttgttccgataca	CT-AC	MTNR1A->LOC285441	0->
FUS_2082631304_2082598705(++)	18	9	15	++	5	344009	5	311410	AHRR	NM_020731_chr5	2	+	PDCD6	NM_013232_chr5	5	+	AATCCAGTGACTGTCAGGTCGATCATATGCtaccggctctctgaccagttccacgacatc	CG-GC	AHRR->PDCD6	0->0
FUS_2114564143_2772866069(++)	9	4	6	++	5	32276848	9	33045718	MTMR12	NM_001040446_chr5	2	-	SMU1	NM_018225_chr9	12	-	TGTTACTTCCTTTTCGTTTGTGTGAATTTCctgtagtcccagctacttgggaggctaagg	CT-GC	SMU1->MTMR12	->0
FUS_2114600164_2930020100(--)	1	1	0	--	5	32312869	X	48969733	MTMR12	NM_001040446_chr5	1	-	GPKOW	NM_015698_chrX	11	-	CCAAGCCCTCCTTCGTGTCGTACGTACGCCctggggtcttcctctgttgcccagactgga	CT-GC	MTMR12->GPKOW	0->
FUS_2123142033_2137699737(-+)	4	1	3	-+	5	40854738	5	55412442	CARD6	NM_032587_chr5	3	+	ANKRD55	NM_024669_chr5	9	-	TGAGCCGAGATCGTGCCATTGCACTCCAGCctgctctcttgggagaggagtttgacacac	CT-AC	ANKRD55->CARD6	1->
FUS_2125461891_2370222121(+-)	7	5	3	+-	5	43174596	6	107019562	ZNF131	NM_003432_chr5	8	+	RTN4IP1	NM_032730_chr6	9	-	AACAGCTGGGACCAGTTCAAAGATCACTTGacagggtctcgctgtgtcacccaggctgga	GT-AG	ZNF131->RTN4IP1	2->
FUS_2144144379_2144162523(++)	1	1	0	++	5	61857084	5	61875228	IPO11	NM_016338_chr5,NM_001134779_chr5	27,27	++	LRRC70	NM_181506_chr5	2	+	TTTGCTCTCTCTTCTGCCATCTGATAATAGccaattctgatctgaacagaaaatccaaga	GT-AG	IPO11->LRRC70	1->
FUS_2151148224_2814654749(++)	18	2	22	++	5	68860929	9	74834398	GTF2H2C,GTF2H2D	NM_001098728_chr5,NM_001042490_chr5	2,3	++	GDA	NM_004293_chr9	6	+	CAGCCTCCCGAGTAGCTGGGATTACAGATTtgtgtcagaaatgctccaaaagaactattc	AT-TT	GTF2H2C,GTF2H2D->GDA	->2
FUS_2156346878_2636332339(+-)	3	1	2	+-	5	74059583	8	42876020	GFM2	NM_170691_chr5,NM_170681_chr5,NM_032380_chr5	2,2,2	---	HOOK3	NM_032410_chr8	22	+	AAGTTGGTCAACATCTTGATCCTCCAAACTgtgcctgtctcggcctcccaaagtgctggg	GT-AT	HOOK3->GFM2	->
FUS_2161729208_2738226483(-+)	7	3	4	-+	5	79441913	8	144770164	SERINC5	NM_001174071_chr5,NM_178276_chr5,NM_001174072_chr5	11,11,11	---	ZNF707	NM_173831_chr8	2	+	TGTGATGATGACCGTCACCAACTGGTTCAAatggagtctcactctgttgcccaggctgga	GT-AG	SERINC5->ZNF707	1->
FUS_2194487449_2472630819(-+)	2	295	0	-+	5	112200154	7	38313188	SRP19	NM_003135_chr5	3	+	TARP	NM_001003806_chr7,NM_001003799_chr7	1,1	--	AATCTCTGTAGCTGTAGGATTTTCAACAGCctgtaatgataagctttgttccgggaccaa	CT-AC	TARP->SRP19	->0
FUS_2197463538_2535193825(--)	4	1	3	--	5	115176243	7	100876194	ATG12	NR_033363_chr5	2	-	CLDN15	NM_001185080_chr7,NM_014343_chr7	4,3	--	CTGTAATCCCAGCACTTTGGTAGGCTGAGGtatctgcgggatggtggccatctcctggta	CG-GG	ATG12->CLDN15	->2
FUS_2215797008_2215848746(++)	22	10	18	++	5	133509713	5	133561451	SKP1	NM_170679_chr5,NM_006930_chr5	2,2	--	MIR3661,PPP2CA	NR_037434_chr5,NM_002715_chr5	1,1	+-	ATCAGAACTCTGCAACTTAATTGAAGGCATcttctcgcagaggctcttgacctgggactc	CT-AC	MIR3661,PPP2CA->SKP1	2->0
FUS_2216583683_2216592924(++)	15	7	10	++	5	134296388	5	134305629	PCBD2	NM_032151_chr5	4	+	CATSPER3	NM_178019_chr5	2	+	TGCTTCTGTGTGATTTCTTCCAAAATACATgaggaacgatgatgaatgtcgggcatttgt	GT-AG	PCBD2->CATSPER3	->2
FUS_2222519943_2294668599(--)	36	11	64	--	5	140232648	6	31466040	PCDHA9	NM_014005_chr5	1	+	MICB	NM_005931_chr6	1	+	CCTGACTAACACGGTGAAACCCCATCTCTAcagcggcggctgccgggggtgcaaaaggga	CT-AC	MICB->PCDHA9	0->
FUS_2238821268_2238857126(++)	19	10	12	++	5	156533973	5	156569831	HAVCR2	NM_032782_chr5	2	-	MED7	NM_004270_chr5	1	-	CCTCCGCTCTGTATTCCACTTCTGAGGACCctcagctctggctttacactggtagccgcc	CT-AC	MED7->HAVCR2	->1
FUS_2240798969_2554908849(-+)	2	144	0	-+	5	158511674	7	120591218	EBF1	NM_024007_chr5	5	-	ING3	NM_019071_chr7,NM_198267_chr7	2,2	++	AGTCTTGCTCACACATGAGATCATGTGCAGtgattgagcagcttcctatggatctgcggg	GT-AG	EBF1->ING3	1->1
FUS_2252502873_2894011664(-+)	18	4	22	-+	5	170215578	X	12961297	GABRP	NM_014211_chr5	2	+	LOC349408	NR_030727_chrX	1	-	CTCACACCAAGGGGCTGAAGTAGGAATCACctgggctgtactgccgcaaggcttcacagg	CT-AC	LOC349408->GABRP	->
FUS_2261356167_2600761888(++)	17	7	18	++	5	179068872	8	7305569	C5orf60	NM_001142306_chr5	6	-	SPAG11B	NM_058200_chr8,NM_058202_chr8	4,3	--	ACTGCACTCCAGCCTGAGCAACAGAGTGAGtcccttggtaaggtggggtgcgcggtggta	AC-TG	SPAG11B->C5orf60	0->
FUS_2273952490_2274094305(++)	10	5	5	++	6	10749931	6	10891746	TMEM14B	NM_001127711_chr6,NM_030969_chr6	3,3	++	SYCP2L	NM_001040274_chr6	2	+	CTGGTGGGATCGTTGGCTATGTAAAAACAGaaaaacaaagatgctttgcagcctattaag	GT-AG	TMEM14B->SYCP2L	0->0
FUS_2295268542_2295286816(++)	8	1	9	++	6	32065983	6	32084257	TNXB	NM_019105_chr6	2	-	ATF6B	NM_001136153_chr6,NM_004381_chr6	17,17	--	GAGCATACTGGGCTGGCATCATTCAGGAGGcattgggggccatggcaggcatcaccaggg	CT-AC	ATF6B->TNXB	0->
FUS_2295987288_2295999736(++)	8	6	4	++	6	32784729	6	32797177	HLA-DOB	NM_002120_chr6	1	-	TAP2	NM_000544_chr6,NM_018833_chr6	11,11	--	ACCACCCAGGGGACCCACCCAGAACCCATTggcctgctcgcactgcacatctagggcact	CT-AC	TAP2->HLA-DOB	2->
FUS_2296014610_2296026474(++)	6	3	3	++	6	32812051	6	32823915	LOC100507463	NR_037174_chr6,NR_037175_chr6,NR_037176_chr6,NR_037173_chr6	1,1,1,1	++++	PSMB9	NM_002800_chr6	2	+	AGCCCACTTGGCGATGGGTTACAGTAAGAGaccaccatcatggcagtggagtttgacggg	GT-AG	LOC100507463->PSMB9	->0
FUS_2301100334_2536411992(++)	2	2	0	++	6	37897775	7	102094361	ZFAND3	NM_021943_chr6	2	+	ORAI2	NM_032831_chr7,NM_001126340_chr7	3,4	++	CTATGAATCTCTGTTCCAAATGCTTTGCTGagacggggttttgccatgttggccaggctg	GT-AG	ZFAND3->ORAI2	0->
FUS_2320715442_2621674978(+-)	2	2	0	+-	6	57512883	8	28218659	PRIM2	NM_000947_chr6	15	+	ZNF395	NM_018660_chr8	2	-	CCTCAGCCTCCCAAGTAGTTGGGACCACAGgagaggagaggcagcagcatggcgagtgtc	GT-AG	PRIM2->ZNF395	->
FUS_2337137703_2337154337(++)	6	2	5	++	6	73935144	6	73951778	KHDC1L	NM_001126063_chr6	1	-	KHDC1	NM_030568_chr6	3	-	CTCGTTCCCACGGCCATGCTGTGCTCCCACctcgagcatgatgataggagtcctggctcc	CT-AC	KHDC1->KHDC1L	0->
FUS_2349486655_2349525109(++)	17	5	15	++	6	86284096	6	86322550	SNX14	NM_153816_chr6,NM_020468_chr6	2,2	--	SYNCRIP	NM_001159676_chr6,NM_001159677_chr6,NM_001159674_chr6,NM_001159673_chr6	11,12,12,11	----	GACCAGAAGATCATTAAAATATGAATATACcattactccactgcaagcttctggtgtaat	CT-AC	SYNCRIP->SNX14	->2
FUS_2351376587_2351389639(++)	4	2	2	++	6	88174028	6	88187080	C6orf165	NM_001031743_chr6	13	+	SLC35A1	NM_001168398_chr6,NM_006416_chr6	2,2	++	TCAATTATGAACAATAGCAAGTACTTAAAGacaatgtcactttattattcaagttatact	GT-AG	C6orf165->SLC35A1	->1
FUS_2372988439_2436924385(-+)	3	5	0	-+	6	109785880	7	2606754	ZBTB24	NM_014797_chr6	7	-	IQCE	NM_152558_chr7	2	+	AGCCTCCCTAGTAGCTGGGACTACAGGGATatgacagtctgtctgcagtcacctttgact	GT-AG	ZBTB24->IQCE	->1
FUS_2375871091_2529067775(--)	2	59	0	--	6	112668532	7	94750144	RFPL4B	NM_001013734_chr6	1	+	PPP1R9A	NM_017650_chr7,NM_001166161_chr7,NM_001166163_chr7,NM_001166162_chr7,NM_001166160_chr7	4,3,3,3,4	+++++	TCTCTACCTCTACAGACCTCTGCTCCTCTCctgccatcccgttgagcagcaccaccttct	GG-AC	PPP1R9A->RFPL4B	1->
FUS_2389532177_2840255350(++)	3	1	2	++	6	126329618	9	100434999	TRMT11	NM_001031712_chr6	8	+	NCBP1	NM_002486_chr9	23	+	ACATAGACTACAACACAGTTCATGGCTTGGcctgctcaacgtgaagatgatgaggatgaa	GT-AG	TRMT11->NCBP1	0->
FUS_2401970697_2442158932(-+)	2	107	0	-+	6	138768138	7	7841301	NHSL1	NM_001144060_chr6,NM_020464_chr6	4,4	--	LOC729852	NR_034084_chr7	3	+	AGGCTGACGTGGTGCCTATTAACATAACTGgagatacaacagatgagcaaagaatgacag	GT-AG	NHSL1->LOC729852	0->
FUS_2430474306_2430550138(++)	12	7	9	++	6	167271747	6	167347579	RPS6KA2	NM_001006932_chr6	2	-	RNASET2	NM_003730_chr6	7	-	CACATCCAGGTTGAGATCCTCCTCTGTGGTttggtagtaattgatggatggttttatccc	CT-AC	RNASET2->RPS6KA2	2->0
FUS_2435223335_2435243324(++)	5	2	3	++	7	905704	7	925693	SUN1	NM_001171944_chr7,NM_025154_chr7,NM_001130965_chr7	14,15,16	+++	GET4	NM_015949_chr7	2	+	TTCTCGCAGTCCCCGCGCGTGGTCATCCAGgtacatgtcccagagcaagcacacggaggc	GT-AG	SUN1->GET4	2->2
FUS_2435292772_2435330448(++)	4	2	2	++	7	975141	7	1012817	ADAP1	NM_006869_chr7	2	-	COX19	NM_001031617_chr7	2	-	CGCCCAGAGTGTAGGAGGCCCAGTCGGGATctctccatcctgcattctaaatattctttt	CT-AC	COX19->ADAP1	1->1
FUS_2440803366_2440841229(++)	2	1	1	++	7	6485735	7	6523598	DAGLB	NM_001142936_chr7,NM_139179_chr7	2,2	--	KDELR2	NM_001100603_chr7,NM_006854_chr7	1,1	--	ATGAGATACAACGTCAGAATGCCAATCCACcggcgcaggagcgcgtcttccagatcttca	CT-AC	KDELR2->DAGLB	0->2
FUS_2465240239_2465269239(++)	13	7	8	++	7	30922608	7	30951608	INMT-FAM188B,FAM188B	NR_037598_chr7,NM_032222_chr7	19,17	++	AQP1	NM_198098_chr7	1	+	CCCACCCCTCGAGCTCTGCATCAGAACCAAcatcggttctgccctgggcttcaaataccc	GT-AG	INMT-FAM188B,FAM188B->AQP1	1->2
FUS_2472214578_2472306073(++)	19	3	18	++	7	37896947	7	37988442	TXNDC3	NM_016616_chr7	6	+	EPDR1	NM_017549_chr7	2	+	AAATGTGAACCTGTTTTTCTCTTTAGTGTTattatttgaatatattttgctgtataagga	GT-AG	TXNDC3->EPDR1	2->2
FUS_2472219261_2472306074(++)	18	1	18	++	7	37901630	7	37988443	TXNDC3	NM_016616_chr7	7	+	EPDR1	NM_017549_chr7	2	+	AATGTGAACCTGTTTTTCTCTTTAGTGTTAttatttgaatatattttgctgtataaggat	AT-GA	TXNDC3->EPDR1	0->0
FUS_2499875281_2499910322(++)	10	6	4	++	7	65557650	7	65592691	ASL	NM_000048_chr7,NM_001024946_chr7,NM_001024943_chr7,NM_001024944_chr7	16,14,15,14	++++	CRCP	NM_001142414_chr7,NM_014478_chr7,NM_001040647_chr7,NR_024548_chr7	2,2,2,2	++++	GCTGTCACTGCAGGAGCTGCAGACCATCAGgaaggatgccaattctgcgcttctcagtaa	GT-AG	ASL->CRCP	1->2
FUS_2499912747_2509943547(-+)	4	1	3	-+	7	65595116	7	75625916	CRCP	NR_024548_chr7	3	+	STYXL1	NM_016086_chr7	9	-	ACTCCAGCCTGGGTGACAGAGCGAGACTCCctctgcaaggtctgctcgttactatgcatg	AT-AC	STYXL1->CRCP	1->
FUS_2524332183_2524352464(++)	18	5	18	++	7	90014552	7	90034833	GTPBP10	NM_033107_chr7,NM_001042717_chr7	10,8	++	CLDN12	NM_001185073_chr7,NM_001185072_chr7,NM_012129_chr7	2,2,2	+++	TCCTTTCATCTGTGACAACCTGGAGGACATgctcagattattgctactctgtattcagat	GT-AG	GTPBP10->CLDN12	->
FUS_2533350522_2533381365(++)	11	5	6	++	7	99032891	7	99063734	PTCD1,ATP5J2-PTCD1	NM_015545_chr7,NM_001198879_chr7	2,3	--	ATP5J2	NM_001190353_chr7,NM_001003714_chr7,NM_004889_chr7	1,1,1	---	CCATTTCTGGCTTTCCTGTCCCTCCAGGGCctggggccggacactcaccaactgacgcca	CT-AC	ATP5J2->PTCD1,ATP5J2-PTCD1	0->1
FUS_2533475949_2533515462(++)	9	2	7	++	7	99158318	7	99197831	ZNF655	NM_024061_chr7,NM_001083956_chr7,NM_001085366_chr7,NM_138494_chr7,NM_001009958_chr7,NM_001085367_chr7,NM_001009960_chr7,NM_001085368_chr7	2,2,2,2,2,2,2,2	++++++++	LOC100289187	NM_001195543_chr7,NM_001195541_chr7,NM_001195542_chr7	2,2,2	+++	ACACCGACATGGAACAGGGACTCACTGGGGttccaagagcctctgagttcctgccttttt	GT-AG	ZNF655->LOC100289187	0->
FUS_2534282871_2534288835(++)	19	9	11	++	7	99965240	7	99971204	PILRB	NM_178238_chr7,NR_036569_chr7,NR_036570_chr7	4,18,17	+++	PILRA	NM_013439_chr7,NM_178272_chr7,NM_178273_chr7	1,1,1	+++	GCATCCACACTGCAATGATATAGGAATGAGgcggcccctccacagggcccctctcctgcc	GT-AG	PILRB->PILRA	->
FUS_2550845812_2722452586(--)	3	1	2	--	7	116528181	8	128996267	CAPZA2	NM_006136_chr7	2	+	PVT1	NR_003367_chr8	5	+	ATGAATGATGAATTTTGCTGCTATACGCACctgtaataccagctactcgggaggctgagg	CT-GC	PVT1->CAPZA2	->0
FUS_2550912364_2551057447(++)	17	6	14	++	7	116594733	7	116739816	ST7OT4	NR_002329_chr7	2	+	ST7	NM_018412_chr7,NM_021908_chr7	2,2	++	TTACAGTCCTTTAAATCTGGAAATTTCAAGtgagcatgtttttgaacacattaacaccga	GT-AG	ST7OT4->ST7	->1
FUS_2562899960_2776035656(+-)	14	1	15	+-	7	128582329	9	36215305	IRF5	NM_001098627_chr7,NM_001098630_chr7,NM_001098629_chr7,NM_032643_chr7	2,2,2,2	++++	GNE	NM_001190388_chr9,NM_001128227_chr9,NM_001190384_chr9,NM_001190383_chr9,NM_005476_chr9	11,12,10,11,12	-----	CAGCCAGGACGGAGATAACACCATCTTCAAgggtctcactctgtcacccaggctggagtg	GG-AC	IRF5->GNE	1->
FUS_2574496591_2870694955(++)	1	1	0	++	7	140178960	9	130874604	MKRN1	NM_013446_chr7,NM_001145125_chr7	1,1	--	LOC100289019	NR_033374_chr9	5	-	CTTCCTTACAAACCCCATGCATAAAATACCtgtagtcccagctacttgggaggctgaggc	TG-CT	LOC100289019->MKRN1	->1
FUS_2615907664_2615914714(++)	2	1	1	++	8	22451345	8	22458395	PDLIM2	NM_176871_chr8,NM_021630_chr8,NM_198042_chr8	9,10,8	+++	C8orf58	NM_001013842_chr8,NM_001198827_chr8,NM_173686_chr8	2,2,2	+++	CTGAACCTGAAGATGCGCGGGCACTTCTGGatggggctggcgagggcctggcacggggct	GT-AG	PDLIM2->C8orf58	2->1
FUS_2616717905_2616748149(++)	8	5	4	++	8	23261586	8	23291830	LOXL2	NM_002318_chr8	1	-	ENTPD4	NM_001128930_chr8,NM_004901_chr8	12,12	--	AGCAGAGGGGGCGGCTCTGGTCTCCGATGGcttaatggtagaaagcgggtcctgtagagg	CT-AC	ENTPD4->LOXL2	1->
FUS_2621675018_2621761007(++)	4	2	2	++	8	28218699	8	28304688	ZNF395	NM_018660_chr8	2	-	FBXO16	NM_172366_chr8	7	-	GAAGGGGACACTGAAGCCTCTGCCCATCACcattgattgtgcttttcttagcctagttct	CT-AC	FBXO16->ZNF395	2->
FUS_2623418320_2623470241(++)	16	2	17	++	8	29962001	8	30013922	LEPROTL1	NM_015344_chr8,NM_001128208_chr8	3,3	++	DCTN6	NM_006571_chr8	1	+	ACTCCCTATTGTATTTGCCAGAGCACATCTgtgtgaagattgctcctggagcagttgtat	GG-GA	LEPROTL1->DCTN6	1->1
FUS_2623418321_2623477946(++)	24	12	17	++	8	29962002	8	30021627	LEPROTL1	NM_015344_chr8,NM_001128208_chr8	3,3	++	DCTN6	NM_006571_chr8	2	+	CTCCCTATTGTATTTGCCAGAGCACATCTGtgtgaagattgctcctggagcagttgtatg	GT-AG	LEPROTL1->DCTN6	2->2
FUS_2623478010_2854159577(++)	10	1	9	++	8	30021691	9	114339226	DCTN6	NM_006571_chr8	2	+	ZNF483	NM_001007169_chr9	6	+	AAAGTGAAATCAGAGGAGATGTAACTATCGctgggcatggtggtgcatgcctgtaatccc	GT-AG	DCTN6->ZNF483	0->
FUS_2636329956_2636370554(++)	16	8	11	++	8	42873637	8	42914235	HOOK3	NM_032410_chr8	22	+	FNTA	NM_002027_chr8	2	+	CCCAGGCCACGTGCAGCCGGCCACAGCAAGggacagagcagaatgggctgatatagatcc	GT-AG	HOOK3->FNTA	1->2
FUS_2660798932_2660811352(++)	5	2	3	++	8	67342613	8	67355033	RRS1	NM_015169_chr8	1	+	ADHFE1	NM_144650_chr8	3	+	GACAGGATTGCCCTTCCGTCAAGAAAGTATcccctggactttcaccttctgggaaaacaa	GT-AG	RRS1->ADHFE1	->1
FUS_2685687550_2685718164(++)	20	10	15	++	8	92231231	8	92261845	LRRC69	NM_001129890_chr8	8	+	SLC26A7	NM_134266_chr8,NM_052832_chr8	2,2	++	AACCTCTTTGGAATTGCTCAGGTGTAGAACagagaagtttacttctacaagaagaaatct	AG-TT	LRRC69->SLC26A7	->
FUS_2685687552_2685718086(++)	2	1	1	++	8	92231233	8	92261767	LRRC69	NM_001129890_chr8	8	+	SLC26A7	NM_134266_chr8,NM_052832_chr8	2,2	++	CCTCTTTGGAATTGCTCAGGTGTAGAACAGctttgacattgtaaaccacagacgaattgg	GT-AG	LRRC69->SLC26A7	->
FUS_2688386458_2830404460(-+)	2	148	0	-+	8	94930139	9	90584109	PDP1	NM_001161780_chr8,NM_001161779_chr8,NM_001161778_chr8	2,2,1	+++	CDK20	NM_001170640_chr9,NM_012119_chr9,NM_001039803_chr9,NM_001170639_chr9,NM_178432_chr9	5,6,7,6,6	-----	CGTCTGGGCCCGGGACACACACACATTCTCcttggaagctgcgatgcgctggtgaggagg	CT-AC	CDK20->PDP1	12->2
FUS_2688663252_2881267183(+-)	10	1	12	+-	8	95206933	X	216816	CDH17	NM_004063_chr8,NM_001144663_chr8	2,2	--	PLCXD1	NM_018390_chrX	7	+	GAAGTATCATAGTTTTCTTTATTCAAATTCctgggaggctgaggtgggaggatcacttga	CT-CT	PLCXD1->CDH17	->
FUS_2737789829_2737813193(++)	3	1	2	++	8	144333510	8	144356874	ZFP41	NM_173832_chr8	2	+	GLI4	NM_138465_chr8	3	+	CCCAGCCCCACAGACCAGCCCAGCATTCAGgctcccctggctccagccctaaggtgctct	GT-AG	ZFP41->GLI4	->1
FUS_2761638550_2761815510(++)	5	1	4	++	9	21818199	9	21995159	MTAP	NM_002451_chr9	4	+	CDKN2B-AS1	NR_003529_chr9	1	+	GATATTGTCATTATTGATCAGTTCATTGACaggactatttgccacgacatttcaaaggat	AG-CT	MTAP->CDKN2B-AS1	2->
FUS_2761638552_2761849783(++)	8	5	4	++	9	21818201	9	22029432	MTAP	NM_002451_chr9	4	+	CDKN2B-AS1	NR_003529_chr9	2	+	TATTGTCATTATTGATCAGTTCATTGACAGgactatttgccacgacatttcaaaggattc	GT-AG	MTAP->CDKN2B-AS1	1->
FUS_2761658260_2761849786(++)	6	2	4	++	9	21837909	9	22029435	MTAP	NM_002451_chr9	5	+	CDKN2B-AS1	NR_003529_chr9	2	+	TGTCATTATTGATCAGTTCATTGACAGGACtatttgccacgacatttcaaaggattccaa	CA-AC	MTAP->CDKN2B-AS1	1->
FUS_2777352406_2777409161(++)	4	3	1	++	9	37532055	9	37588810	FBXO10	NM_012166_chr9	4	-	TOMM5	NM_001134485_chr9,NM_001001790_chr9,NM_001134484_chr9	2,2,2	---	GCGGTAAATGTCGTTCCTGAGCATGATGATctttctgggcctattcacttgcagagagga	CT-AC	TOMM5->FBXO10	->0
FUS_2777362122_2777409159(++)	21	9	15	++	9	37541771	9	37588808	FBXO10	NM_012166_chr9	2	-	TOMM5	NM_001134485_chr9,NM_001001790_chr9,NM_001134484_chr9	2,2,2	---	CAAGGGGAGGCCACCAGCCTCCATGGTCACacctttctgggcctattcacttgcagagag	CT-AC	TOMM5->FBXO10	->
FUS_2777720298_2777768983(++)	7	3	4	++	9	37899947	9	37948632	MCART1	NR_024872_chr9,NR_024873_chr9,NM_033412_chr9	3,2,2	---	SHB	NM_003028_chr9	5	-	TTCTTGAGTCAATTTTGATAACTGGATTTCctcagggagagggagtagtcatgcttgctg	CT-AC	SHB->MCART1	1->
FUS_2867521496_2867530548(++)	17	5	18	++	9	127701145	9	127710197	GOLGA1	NM_002077_chr9	3	-	SCAI	NM_001144877_chr9,NM_173690_chr9	18,19	--	GTGGGCCAAGGGCTTATGGCAACACAGGATctgactatatttccagtccagagtgttctc	CT-AC	SCAI->GOLGA1	->
FUS_2867522737_2867530550(++)	13	1	18	++	9	127702386	9	127710199	GOLGA1	NM_002077_chr9	2	-	SCAI	NM_001144877_chr9,NM_173690_chr9	18,19	--	GGGCCAAGGGCTTATGGCAACACAGGATCTgactatatttccagtccagagtgttctctg	GG-CT	SCAI->GOLGA1	->
FUS_2867844587_2899285009(+-)	3	3	0	+-	9	128024236	X	18234642	GAPVD1	NM_015635_chr9	1	+	BEND2	NM_153346_chrX,NM_001184767_chrX	2,2	--	TCCTCCGTGTCCTCCCCCGCATGACCCCCTtgggtctggctctgtcacccaggctggagt	TG-TA	GAPVD1->BEND2	->2
FUS_2867844589_2899282398(+-)	2	2	0	+-	9	128024238	X	18232031	GAPVD1	NM_015635_chr9	1	+	BEND2	NM_153346_chrX,NM_001184767_chrX	3,3	--	CTCCGTGTCCTCCCCCGCATGACCCCCTTGggtctggctctgtcacccaggctggagtgc	GT-AG	GAPVD1->BEND2	->1
FUS_2870713056_2880230182(-+)	2	1	1	-+	9	130892705	9	140409831	LOC389791	NR_024425_chr9	1	+	PNPLA7	NM_152286_chr9,NM_001098537_chr9	11,12	--	GGCACCGAGGCAAGAGACAGAGGACACGAGcttgtggggccgaagggtcagggtcacctg	CT-AC	PNPLA7->LOC389791	0->
FUS_2871524201_2871531819(++)	24	13	16	++	9	131703850	9	131711468	PHYHD1	NM_174933_chr9,NM_001100877_chr9,NM_001100876_chr9	11,9,12	+++	NUP188	NM_015354_chr9	2	+	CTCTGGCACCACCTGGAGCCCGGAGAACTGgagcagtagagaactgtggactattctgct	GT-AG	PHYHD1->NUP188	01->2
FUS_2875807890_2875850916(++)	4	2	2	++	9	135987539	9	136030565	RALGDS	NM_001042368_chr9,NM_006266_chr9	2,2	--	GBGT1	NM_021996_chr9	6	-	CAGCTCCTCACCGATCTCCTGCGTGGAGCTttccccacggcaaacaccgtgaccccaatg	CT-AC	GBGT1->RALGDS	1->0
FUS_2878259382_3034725224(--)	18	7	17	--	9	138439031	X	153674857	OBP2A	NM_014582_chr9	3	+	FAM50A	NM_004699_chrX	4	+	CATCAGGATTTTCTTCTGGATGCACCGATCctccctcttcttcctcctccagggtgaagg	CT-GC	FAM50A->OBP2A	0->0
FUS_2918335620_2919575742(++)	9	2	7	++	X	37285253	X	38525375	PRRG1	NM_001173490_chrX,NM_001173486_chrX,NM_001142395_chrX,NM_001173489_chrX,NM_000950_chrX	3,3,3,4,4	+++++	TSPAN7	NM_004615_chrX	2	+	AGAGAAGCTTTTGAAAATAATGAAAAAACTatcactggggtgatcctgctggctgttgga	GT-AG	PRRG1->TSPAN7	2->0
FUS_3029632935_3029661271(++)	4	3	2	++	X	148582568	X	148610904	IDS	NM_000202_chrX,NM_006123_chrX,NM_001166550_chrX	4,4,4	---	LOC100131434	NR_027455_chrX	9	-	GAGAATCATCGGTATGGTTAGAAGATATCCcacgcagtaatgcagcgtgttccttccctt	CT-AC	LOC100131434->IDS	->1

## Sheet: d) Tophat-fusion Raw Results
Fusion	Sample Name	Gene on left	Chr on left	Coord on left	Gene on right	Chr on right	Coord on right	Span reads	Span Mates	Span Mate Span
22. chr7-chr5 rf	simreads	TARP	chr7	38313186	SRP19	chr5	112200154	295	0	0
33. chr11-chr12 ff	simreads	ENSG00000172487	chr11	56128763	CHST11	chr12	104850691	280	0	0
29. chr16-chr2 fr	simreads	ACSM5	chr16	20448500	AGAP1	chr2	236684437	260	0	0
36. chr8-chr18 ff	simreads	OTUD6B	chr8	92096341	POLI	chr18	51804072	237	0	0
32. chr8-chr19 ff	simreads	OXR1	chr8	107593478	ENSG00000204517	chr19	58350390	219	0	0
34. chr8-chr19 fr	simreads	OXR1	chr8	107593479	ZNF552	chr19	58324786	219	0	0
13. chr1-chr16 rf	simreads	S100A3	chr1	153520817	SLX1B-SULT1A4	chr16	29474668	211	0	0
14. chr1-chr16 rf	simreads	S100A3	chr1	153520817	SULT1A3	chr16	30214013	211	0	0
24. chr1-chrX rf	simreads	F11R	chr1	160990799	HPRT1	chrX	133607388	182	0	0
40. chr9-chr8 rf	simreads	CDK20	chr9	90584107	PDP1	chr8	94930139	148	0	0
30. chr5-chr7 rf	simreads	EBF1	chr5	158511673	ING3	chr7	120591217	144	0	0
25. chr7-chr17 rr	simreads	LAMB1	chr7	107642571	CWC25	chr17	36977325	112	0	0
31. chr19-chr11 fr	simreads	PVRL2	chr19	45389476	CTSC	chr11	88070899	108	0	0
15. chr6-chr7 rf	simreads	NHSL1	chr6	138768136	LOC729852	chr7	7841301	107	0	0
27. chr1-chrX rf	simreads	RNASEL	chr1	182545390	CA5B	chrX	15768025	103	0	0
35. chr11-chr10 fr	simreads	TIRAP	chr11	126162951	OGDHL	chr10	50959028	99	0	0
8. chrX-chr14 rr	simreads	CUL4B	chrX	119680990	ENSG00000211966	chr14	107035220	87	0	0
23. chr12-chr11 ff	simreads	IFT81	chr12	110628852	CAPN5	chr11	76813885	70	0	0
37. chr16-chr1 rr	simreads	COX6A2	chr16	31439335	ENSG00000142867	chr1	85742772	70	0	0
20. chr3-chr18 rr	simreads	PDZRN3	chr3	73434819	TMEM200C	chr18	5892102	69	0	0
38. chr3-chr10 rf	simreads	KIAA1257	chr3	128711885	IFIT1B	chr10	91137812	66	0	0
39. chrY-chr1 ff	simreads	TBL1Y	chrY	6954457	ENSG00000203782	chr1	153232175	66	0	0
28. chr7-chr6 ff	simreads	PPP1R9A	chr7	94750143	RFPL4B	chr6	112668531	59	0	0
18. chr10-chr7 ff	simreads	ZMIZ1	chr10	81050930	BPGM	chr7	134346196	52	0	0
1. chr2-chr1 ff	simreads	PLEKHB2	chr2	131890561	SSBP3	chr1	54867587	12	0	0
11. chr6-chr11 fr	simreads	ARMC2	chr6	109215746	TMEM218	chr11	124972703	8	0	0
19. chr13-chr12 rf	simreads	HTR2A	chr13	47469629	PLEKHA5	chr12	19443610	8	0	0
26. chr1-chr1 rf	simreads	PTCH2	chr1	45297646	LEPR	chr1	65895544	8	0	0
7. chr16-chr15 ff	simreads	UBFD1	chr16	23570996	KIF23	chr15	69738347	6	0	0
3. chr1-chr12 rf	simreads	DDOST	chr1	20982592	RAN	chr12	131357129	5	0	0
5. chrX-chr19 fr	simreads	ARR3	chrX	69497651	C19orf29	chr19	3618984	5	0	0
21. chr7-chr19 rf	simreads	LOC401397	chr7	112758122	ZNF773	chr19	58016024	4	0	0
4. chr9-chr17 rr	simreads	MAPKAP1	chr9	128419928	CCL14-CCL15	chr17	34311486	4	0	0
2. chr3-chr12 rf	simreads	WDR82	chr3	52304727	ACAD10	chr12	112147329	3	0	0
6. chr11-chr13 rf	simreads	ENSG00000255395	chr11	74811635	SACS	chr13	23928657	3	0	0
9. chr11-chr11 rr	simreads	C11orf34	chr11	112119521	COMMD9	chr11	36297789	2	0	0
10. chr3-chr14 fr	simreads	MITF	chr3	69987199	SLC35F4	chr14	58033281	1	0	0
12. chr9-chr4 fr	simreads	CERCAM	chr9	131196507	SH3RF1	chr4	170057770	1	0	0
16. chr9-chr6 fr	simreads	DNAJC25	chr9	114411864	TULP1	chr6	35473954	1	0	0
17. chr10-chr2 ff	simreads	GTPBP4	chr10	1041971	KCMF1	chr2	85273226	1	0	0
